# Supplementary material for: Proteomics-Based Detection of Immune Dysfunction in an Elite Adventure Athlete Trekking Across the Antarctica
Source: Proteomes. 2020 Mar 3;8(1):4. doi: 10.3390/proteomes8010004 (PMC7151708; doi:10.3390/proteomes8010004)
Supplement: Supplementary file 1 [file proteomes-08-00004-s001.xlsx]

## Sheet: Proteins Identified, Analyzed
		tA_training.wk1_wk4-tB_greenland.wk5_wk8						tC_training.wk9_wk15-tB_greenland.wk5_wk8						tD_antarctica.wk16_wk19-tB_greenland.wk5_wk8						tE_antarctica.wk20_wk23-tB_greenland.wk5_wk8						tF_recovery.wk24_wk26-tB_greenland.wk5_wk8
hgnc_symbol	Uniprot	logFC	CI.L	CI.R	t	P.Value	adj.P.Val	logFC	CI.L	CI.R	t	P.Value	adj.P.Val	logFC	CI.L	CI.R	t	P.Value	adj.P.Val	logFC	CI.L	CI.R	t	P.Value	adj.P.Val	logFC	CI.L	CI.R	AveExpr	t	P.Value	adj.P.Val
A0A075B6I5;P01702;P06316	IGLV1-51	0.42118	-0.12076	0.963119	1.60972	0.121407	0.361681	0.0133679	-0.46701	0.493746	0.0576388	0.954545	0.993462	0.20464	-0.337299	0.746579	0.78212	0.442301	0.815851	-0.740876	-1.28282	-0.198937	-2.83158	0.00958397	0.101118	0.176488	-0.408873	0.76185	0.624491	0.53859	0.706217	0.706217
A0A0A0MRZ8;P04433	IGKV3-11;IGKV3D-11	0.239058	-0.311357	0.789474	0.899595	0.377868	0.64364	0.172285	-0.315607	0.660176	0.731404	0.472085	0.829514	0.0390001	-0.511416	0.589416	0.14676	0.884629	0.974667	-0.171266	-0.721681	0.37915	-0.644486	0.52578	0.747216	0.472321	-0.122196	1.06684	1.64553	0.113766	0.286223	0.286223
A0A0C4DH73;P01611	IGKV1-12;IGKV1D-12	0.586057	-0.425873	1.59799	1.19956	0.242794	0.526412	-0.0704456	-0.967425	0.826534	-0.162669	0.872232	0.9734	-0.0964201	-1.10835	0.915509	-0.197356	0.845322	0.967635	-0.534817	-1.54675	0.477112	-1.09468	0.285241	0.57533	-0.219009	-1.31202	0.874	-0.415023	0.682058	0.810316	0.286223
A0M8Q6	IGLC7	0.35381	-0.105326	0.812946	1.59611	0.124422	0.363418	0.113825	-0.293156	0.520806	0.579292	0.56815	0.875747	-0.174921	-0.634057	0.284215	-0.789103	0.438292	0.815309	-0.493774	-0.95291	-0.034638	-2.22751	0.0362192	0.211187	-0.00412679	-0.500051	0.491797	-0.0172358	0.9864	0.993376	0.810316
A6NDG6	PGP	-0.0910804	-0.47965	0.297489	-0.485501	0.632017	0.805002	-0.0366052	-0.381035	0.307825	-0.220128	0.827757	0.954502	0.065985	-0.322584	0.454554	0.351731	0.728314	0.930987	0.0138418	-0.374727	0.402411	0.0737835	0.941835	0.976886	-0.0713543	-0.491057	0.348348	-0.352137	0.728013	0.84147	0.810316
B2RUZ4	SMIM1	-0.0312215	-0.439785	0.377342	-0.158281	0.875648	0.951072	0.00861082	-0.353542	0.370763	0.0492478	0.961157	0.993462	-0.0660785	-0.474642	0.342485	-0.334992	0.740735	0.931808	0.0993749	-0.309188	0.507938	0.503792	0.619307	0.81278	-0.0951085	-0.536407	0.34619	-0.446396	0.65958	0.795967	0.993376
B9A064	IGLL5	0.229967	-0.228012	0.687945	1.04005	0.30937	0.585206	0.318373	-0.0875814	0.724328	1.6244	0.118224	0.574788	0.0359727	-0.422006	0.493951	0.162691	0.872215	0.974667	0.0686852	-0.389293	0.526664	0.310636	0.758938	0.88371	0.264337	-0.230336	0.75901	1.10681	0.280074	0.464831	0.84147
E5RJM6	ANKRD65	-0.146873	-0.765362	0.471615	-0.491864	0.627582	0.802223	0.121109	-0.427122	0.66934	0.457559	0.651659	0.912139	-0.271956	-0.890444	0.346532	-0.910754	0.372084	0.773523	-0.219542	-0.838031	0.398946	-0.735226	0.4698	0.710186	-0.552483	-1.22053	0.11556	-1.71296	0.100474	0.270974	0.795967
E9PGN7;H9KV48;P05155	SERPING1	0.483531	-0.560441	1.5275	0.959333	0.347592	0.612588	0.425101	-0.500281	1.35048	0.951492	0.351469	0.776892	0.174784	-0.869188	1.21876	0.346775	0.731984	0.931808	0.733859	-0.310113	1.77783	1.45599	0.159215	0.434335	0.682066	-0.445552	1.80969	1.25285	0.223132	0.421631	0.464831
O00151	PDLIM1	0.228722	-0.259454	0.716898	0.970432	0.342153	0.607513	0.23727	-0.195452	0.669992	1.13571	0.268037	0.712099	-0.122596	-0.610772	0.36558	-0.520156	0.608038	0.887137	-0.0213502	-0.509526	0.466826	-0.0905855	0.928624	0.974967	0.104069	-0.423221	0.63136	0.408796	0.686556	0.81119	0.270974
O00231;O00231-2	PSMD11	-0.174943	-0.393546	0.0436595	-1.65758	0.111287	0.352161	0.106399	-0.0873718	0.300169	1.13732	0.267377	0.712099	-0.165982	-0.384585	0.0526202	-1.57268	0.129757	0.620476	0.0121259	-0.206477	0.230728	0.114893	0.909549	0.96573	-0.36725	-0.603368	-0.131133	-3.22157	0.00385237	0.0415589	0.421631
O00232	PSMD12	-0.200162	-0.722352	0.322028	-0.79394	0.435528	0.688254	-0.0238472	-0.486719	0.439025	-0.106711	0.915964	0.986362	0.00610406	-0.516086	0.528294	0.0242116	0.980897	0.994361	0.0900632	-0.432127	0.612253	0.357234	0.724247	0.868121	-0.294504	-0.858533	0.269526	-1.08149	0.29094	0.471866	0.81119
O00233	PSMD9	-0.193525	-0.447319	0.0602694	-1.57939	0.12821	0.368087	-0.0944026	-0.319367	0.130562	-0.869168	0.393937	0.79197	-0.0871941	-0.340988	0.1666	-0.711605	0.484026	0.823734	-0.356003	-0.609797	-0.102209	-2.9054	0.00808645	0.0885777	-0.218762	-0.492891	0.0553668	-1.65292	0.112241	0.284397	0.0415589
O00299	CLIC1	0.0451663	-0.153244	0.243576	0.471502	0.641824	0.81313	-0.0903167	-0.266189	0.0855552	-1.06367	0.298768	0.736065	0.116107	-0.0823034	0.314517	1.21207	0.238066	0.686248	-0.126064	-0.324474	0.0723461	-1.31602	0.201426	0.476462	-0.184748	-0.399055	0.0295598	-1.78556	0.0876633	0.247684	0.471866
O00410;O00410-3	IPO5	-0.321758	-0.693956	0.0504397	-1.79056	0.0868355	0.322015	-0.121997	-0.451915	0.207921	-0.765911	0.451694	0.825172	-0.389137	-0.761335	-0.0169393	-2.16552	0.0412116	0.51616	-0.390299	-0.762497	-0.0181015	-2.17199	0.0406631	0.221819	-0.317181	-0.7192	0.0848384	-1.63416	0.116148	0.288839	0.284397
O00743;O00743-2;O00743-3	PPP6C	-0.520963	-1.05927	0.0173443	-2.00452	0.0572	0.282822	-0.164516	-0.641675	0.312642	-0.714134	0.482491	0.833819	-0.282762	-0.821069	0.255546	-1.08799	0.288123	0.715548	-0.260574	-0.798882	0.277733	-1.00262	0.326712	0.612902	-1.07821	-1.65965	-0.496772	-3.8409	0.000861059	0.014597	0.247684
O14618	CCS	-0.256595	-0.488145	-0.0250445	-2.29528	0.0313962	0.227335	-0.0723866	-0.277634	0.132861	-0.73049	0.472633	0.829514	-0.139032	-0.370583	0.0925178	-1.24367	0.22643	0.682215	-0.0443521	-0.275902	0.187198	-0.396736	0.695301	0.856496	-0.379427	-0.62953	-0.129325	-3.14227	0.00464858	0.0433049	0.288839
O14744	PRMT5	-0.138199	-0.514598	0.2382	-0.760484	0.454865	0.694986	-0.0646867	-0.398328	0.268955	-0.401576	0.691786	0.93641	-0.272079	-0.648478	0.10432	-1.4972	0.148244	0.634427	-0.404165	-0.780563	-0.0277661	-2.22405	0.0364832	0.211187	-0.234224	-0.640782	0.172333	-1.19329	0.245194	0.440827	0.014597
O14791;O14791-2	APOL1	0.366185	-0.0678447	0.800215	1.74749	0.0941947	0.32584	0.300143	-0.084583	0.68487	1.61589	0.120062	0.574788	0.195628	-0.238402	0.629657	0.933565	0.360444	0.768372	0.360004	-0.074026	0.794034	1.71799	0.0995374	0.351577	0.845919	0.377113	1.31472	3.7374	0.00110926	0.0183672	0.0433049
O14818	PSMA7	-0.131458	-0.359249	0.0963338	-1.19531	0.244417	0.526412	-0.0946677	-0.296583	0.107248	-0.971103	0.341826	0.77019	-0.186094	-0.413886	0.0416971	-1.69211	0.104435	0.61312	-0.133833	-0.361625	0.0939585	-1.21691	0.236254	0.514412	-0.207592	-0.453635	0.038451	-1.74756	0.0941816	0.256924	0.440827
O14950;P19105	MYL12A;MYL12B	-0.00190209	-0.612652	0.608848	-0.00645064	0.99491	0.998016	0.0709703	-0.470401	0.612342	0.271528	0.788462	0.954502	0.0347644	-0.575985	0.645514	0.117898	0.907195	0.974667	-0.308954	-0.919704	0.301796	-1.04777	0.305877	0.596935	-0.484731	-1.14442	0.174954	-1.52194	0.141961	0.328169	0.0183672
O14980	XPO1	-0.119921	-0.473251	0.233409	-0.702987	0.489277	0.721294	0.235102	-0.0780916	0.548295	1.55481	0.133952	0.574788	0.0297796	-0.32355	0.383109	0.174571	0.862979	0.972216	0.167241	-0.186089	0.520571	0.980384	0.337326	0.625322	-0.130907	-0.512547	0.250733	-0.710464	0.484719	0.659688	0.256924
O15067	PFAS	-0.153196	-0.552743	0.246352	-0.794166	0.435399	0.688254	-0.213093	-0.567254	0.141068	-1.24624	0.225501	0.684266	-0.294042	-0.69359	0.105505	-1.52432	0.14137	0.629094	-0.201902	-0.60145	0.197646	-1.04666	0.306375	0.596935	-0.43068	-0.862241	0.000880865	-2.06703	0.0504309	0.172629	0.328169
O15144	ARPC2	-0.141787	-0.796325	0.512751	-0.448678	0.657957	0.824348	0.198817	-0.381369	0.779002	0.709773	0.48514	0.836282	0.00398944	-0.650548	0.658527	0.0126244	0.990039	0.995632	-0.244967	-0.899505	0.40957	-0.775188	0.446303	0.694371	0.0196261	-0.687356	0.726608	0.0574988	0.954656	0.97241	0.328169
O15400;O15400-2	STX7	0.22022	-0.462842	0.903281	0.667775	0.511072	0.738101	0.037625	-0.567844	0.643095	0.128712	0.89873	0.985948	-0.0525441	-0.735606	0.630518	-0.15933	0.874831	0.974667	0.449998	-0.233064	1.13306	1.36453	0.185899	0.458376	-0.683629	-1.42142	0.0541621	-1.9192	0.0677358	0.207879	0.659688
O43242	PSMD3	-0.110008	-0.389278	0.169263	-0.815891	0.42312	0.688254	-0.0911213	-0.338668	0.156425	-0.762424	0.45373	0.825172	-0.194989	-0.474259	0.0842817	-1.44617	0.161924	0.635041	-0.183138	-0.462408	0.0961327	-1.35827	0.187848	0.459614	-0.401186	-0.702833	-0.0995399	-2.75475	0.0114208	0.0767134	0.172629
O43396	TXNL1	-0.210742	-0.462644	0.0411598	-1.73282	0.0968204	0.327953	0.105055	-0.118232	0.328342	0.974512	0.340168	0.77019	-0.0166281	-0.26853	0.235274	-0.136724	0.892465	0.974667	0.033796	-0.218106	0.285698	0.277887	0.783638	0.893611	-0.0771824	-0.349267	0.194903	-0.587553	0.562685	0.721859	0.97241
O43488	AKR7A2	0.0485792	-0.265695	0.362854	0.320166	0.751798	0.878101	-0.122395	-0.40097	0.156179	-0.910033	0.372456	0.784928	-0.207383	-0.521657	0.106892	-1.36677	0.185205	0.66648	-0.166585	-0.48086	0.147689	-1.0979	0.283865	0.574182	-0.18571	-0.525165	0.153745	-1.13315	0.269088	0.45946	0.207879
O43598	DNPH1	-0.113015	-0.379247	0.153217	-0.879244	0.388567	0.652499	-0.0427869	-0.278776	0.193202	-0.375536	0.71078	0.947707	0.00988302	-0.256349	0.276115	0.0768889	0.939392	0.98606	0.0791503	-0.187081	0.345382	0.615781	0.544221	0.765781	-0.0665024	-0.354066	0.221061	-0.479003	0.636561	0.782783	0.0767134
O43665-3	RGS10	-0.367143	-0.829101	0.0948147	-1.64614	0.113639	0.354026	-0.374589	-0.78407	0.034893	-1.89476	0.0710531	0.516223	-0.137887	-0.599845	0.32407	-0.618238	0.54263	0.857771	-0.744331	-1.20629	-0.282373	-3.33732	0.00292266	0.0507545	-0.427385	-0.926356	0.0715863	-1.7741	0.0895881	0.248197	0.721859
O43707;P12814	ACTN1;ACTN4	-0.793307	-1.48081	-0.105802	-2.39001	0.0256368	0.213054	-0.457602	-1.06701	0.151806	-1.5553	0.133836	0.574788	-0.455663	-1.14317	0.231842	-1.37278	0.183355	0.66648	-0.510284	-1.19779	0.177221	-1.53734	0.138161	0.404697	-0.698201	-1.44079	0.0443891	-1.94744	0.064073	0.202755	0.45946
O43707;P12814;Q08043	ACTN1;ACTN3;ACTN4	0.121129	-0.957561	1.19982	0.232587	0.818186	0.913085	-0.230106	-1.18626	0.72605	-0.498462	0.622998	0.907106	-0.0202787	-1.09897	1.05841	-0.0389383	0.969283	0.990977	-1.04506	-2.12375	0.0336287	-2.00668	0.0569528	0.277742	-0.0801007	-1.24522	1.08502	-0.142397	0.888035	0.931009	0.782783
O43765	SGTA	-0.181698	-0.677984	0.314587	-0.758321	0.456132	0.695365	-0.139928	-0.579838	0.299982	-0.658832	0.516693	0.838434	-0.249688	-0.745974	0.246597	-1.04208	0.308448	0.727202	-0.535284	-1.03157	-0.0389981	-2.23401	0.0357289	0.211187	-0.379314	-0.915364	0.156735	-1.46564	0.156588	0.348357	0.248197
O43813	LANCL1	-0.653691	-1.32347	0.0160837	-2.02152	0.0552836	0.280001	0.169333	-0.424359	0.763025	0.590765	0.560569	0.8729	0.0658574	-0.603917	0.735632	0.203662	0.840449	0.967635	-0.0176623	-0.687437	0.652112	-0.05462	0.956924	0.976886	-0.160012	-0.883451	0.563427	-0.458126	0.651258	0.790726	0.202755
O60256	PRPSAP2	-0.369153	-0.842711	0.104406	-1.61461	0.12034	0.360009	-0.10059	-0.520354	0.319175	-0.496344	0.624468	0.907391	-0.0176812	-0.49124	0.455877	-0.0773345	0.939041	0.98606	-0.0644206	-0.537979	0.409138	-0.281763	0.780701	0.893611	-0.226704	-0.738205	0.284798	-0.918007	0.368356	0.550986	0.202755
O60610;O60610-2;O60610-3	DIAPH1	-0.210935	-0.455711	0.0338403	-1.7849	0.0877731	0.322136	0.0714809	-0.145489	0.288451	0.682375	0.50197	0.838434	-0.0784161	-0.323192	0.166359	-0.663546	0.513726	0.838928	-0.193496	-0.438272	0.0512791	-1.63734	0.115477	0.378893	-0.21219	-0.476577	0.0521981	-1.66233	0.110324	0.283926	0.931009
O60664;O60664-3;O60664-4	PLIN3	-0.393785	-0.766381	-0.0211896	-2.18905	0.0392479	0.236818	-0.111645	-0.441916	0.218626	-0.700169	0.491002	0.837687	-0.10636	-0.478956	0.266236	-0.591253	0.560247	0.8632	-0.11505	-0.487646	0.257546	-0.639563	0.528918	0.748687	-0.57372	-0.97617	-0.171271	-2.95272	0.00724687	0.0575798	0.931009
O60814;P06899;P23527;P33778;P58876;P62807;Q16778;Q5QNW6;Q5QNW6-2;Q93079;Q99877;Q99879	HIST1H2BB;HIST1H2BC;HIST1H2BD;HIST1H2BE;HIST1H2BF;HIST1H2BG;HIST1H2BH;HIST1H2BI;HIST1H2BJ;HIST1H2BK;HIST1H2BM;HIST1H2BN;HIST1H2BO;HIST2H2BE;HIST2H2BF	0.124583	-0.537131	0.786297	0.389961	0.700234	0.844009	-0.104384	-0.690931	0.482163	-0.368609	0.715866	0.948165	-0.398544	-1.06026	0.26317	-1.2475	0.225049	0.682215	-1.30136	-1.96307	-0.639643	-4.07343	0.000486227	0.0203643	-0.354852	-1.06958	0.359881	-1.02834	0.314723	0.497962	0.931009
O75083	WDR1	-0.031002	-0.267293	0.205289	-0.271754	0.78829	0.900903	-0.0289363	-0.238386	0.180513	-0.286153	0.777381	0.954502	-0.0735925	-0.309883	0.162698	-0.64509	0.525395	0.848878	-0.153473	-0.389764	0.0828172	-1.3453	0.191936	0.465129	-0.209271	-0.464494	0.0459525	-1.69833	0.10324	0.27475	0.348357
O75223	GGCT	-0.0366434	-0.392409	0.319122	-0.213337	0.832986	0.919513	-0.322683	-0.638035	-0.00733078	-2.1194	0.0453204	0.432792	-0.259394	-0.615159	0.0963718	-1.51018	0.14492	0.634427	-0.310943	-0.666708	0.0448228	-1.8103	0.0836322	0.328984	-0.387659	-0.77193	-0.0033885	-2.08952	0.0481762	0.166512	0.790726
O75340;O75340-2	PDCD6	-0.072213	-0.595321	0.450895	-0.285929	0.77755	0.894371	-0.12661	-0.590295	0.337076	-0.565558	0.577294	0.882045	0.00582852	-0.517279	0.528936	0.0230781	0.981791	0.994361	-0.249211	-0.772318	0.273897	-0.986755	0.33426	0.621393	-0.162922	-0.727942	0.402099	-0.597238	0.556314	0.720174	0.550986
O75347	TBCA	-0.25703	-0.488407	-0.0256526	-2.30089	0.0310245	0.227335	-0.0830979	-0.288192	0.121996	-0.839211	0.410183	0.802066	-0.180603	-0.41198	0.0507744	-1.61673	0.119878	0.620476	-0.082288	-0.313665	0.149089	-0.736631	0.468962	0.710186	-0.310085	-0.560001	-0.0601695	-2.56993	0.0172949	0.0962744	0.283926
O75368	SH3BGRL	0.0410218	-0.223303	0.305347	0.321448	0.750839	0.878101	0.110836	-0.123463	0.345135	0.979812	0.337602	0.77019	-0.070225	-0.33455	0.1941	-0.550284	0.587549	0.874596	-0.12379	-0.388115	0.140534	-0.970025	0.342351	0.625322	-0.0109329	-0.296436	0.274571	-0.0793158	0.937483	0.960414	0.0575798
O75636	FCN3	0.694125	-0.0460243	1.43427	1.94246	0.0647065	0.287759	-0.137507	-0.793579	0.518565	-0.434117	0.66834	0.920421	0.61719	-0.122959	1.35734	1.72716	0.0978495	0.61312	-0.321849	-1.062	0.4183	-0.900672	0.377307	0.65562	0.906761	0.107308	1.70621	2.34927	0.0279825	0.122819	0.497962
O75832	PSMD10	-0.221677	-0.984249	0.540896	-0.602105	0.553127	0.760763	-0.119904	-0.795853	0.556044	-0.367413	0.716746	0.948165	0.00347347	-0.759099	0.766046	0.00943444	0.992556	0.996756	-0.3197	-1.08227	0.442873	-0.868351	0.394374	0.66539	-0.269025	-1.0927	0.554647	-0.676507	0.505618	0.680529	0.497962
O75874	IDH1	-0.073299	-0.682441	0.535843	-0.249238	0.805439	0.907366	0.154988	-0.384958	0.694935	0.594542	0.558084	0.8729	0.363425	-0.245717	0.972566	1.23575	0.229305	0.682215	0.514966	-0.0941753	1.12411	1.75103	0.0935699	0.339907	0.375205	-0.282743	1.03315	1.18117	0.249877	0.441478	0.497962
O75882;O75882-2	ATRN	0.558414	-0.144675	1.2615	1.64505	0.113865	0.354026	0.452564	-0.170658	1.07579	1.50408	0.146475	0.581747	0.405437	-0.297653	1.10853	1.19439	0.24477	0.68884	0.439527	-0.263562	1.14262	1.29482	0.208519	0.488373	1.20923	0.449807	1.96865	3.29806	0.00321044	0.0401023	0.497962
O75882;P04003	ATRN;C4BPA	0.157659	-0.157621	0.47294	1.03575	0.311327	0.585206	-0.0936948	-0.373161	0.185772	-0.694416	0.494533	0.838434	-0.162583	-0.477863	0.152698	-1.0681	0.296808	0.717018	-0.251968	-0.567249	0.0633127	-1.65532	0.111749	0.3718	0.0465521	-0.29399	0.387094	0.283141	0.779659	0.876962	0.497962
O75955	FLOT1	-0.272634	-0.510578	-0.0346907	-2.37323	0.02658	0.213054	-0.175443	-0.386357	0.0354718	-1.72291	0.0986292	0.567703	-0.19151	-0.429453	0.0464336	-1.66706	0.10937	0.61312	-0.257071	-0.495015	-0.0191279	-2.23776	0.0354491	0.211187	-0.344838	-0.601846	-0.0878294	-2.77908	0.0108057	0.0754278	0.497962
O76003	GLRX3	-0.688361	-2.03493	0.658203	-1.05882	0.300921	0.579069	-0.27658	-1.47018	0.917021	-0.479949	0.635898	0.909956	-1.16114	-2.50771	0.185419	-1.78605	0.0875828	0.599783	-0.172799	-1.51936	1.17376	-0.265796	0.792818	0.895737	-0.713792	-2.16825	0.740663	-1.01649	0.320205	0.499969	0.497962
O94919	ENDOD1	-0.129072	-0.871678	0.613535	-0.360002	0.722204	0.855612	-0.152568	-0.810819	0.505682	-0.480073	0.635812	0.909956	-0.414738	-1.15734	0.327869	-1.15677	0.259504	0.694612	-0.610394	-1.353	0.132213	-1.70249	0.102447	0.352377	-0.311829	-1.11394	0.490278	-0.805226	0.429121	0.609349	0.497962
O95336	PGLS	-0.119913	-0.437229	0.197403	-0.782722	0.441955	0.688254	-0.241574	-0.522845	0.0396972	-1.77893	0.0887727	0.55439	-0.303845	-0.621162	0.0134711	-1.98332	0.0596721	0.568163	-0.408785	-0.726102	-0.0914689	-2.66831	0.0138844	0.122045	-0.296359	-0.6391	0.0463816	-1.79096	0.0867696	0.246135	0.497962
O95373	IPO7	0.17356	-0.579074	0.926194	0.477639	0.637517	0.809112	0.962075	0.294937	1.62921	2.98694	0.00669247	0.207176	0.543199	-0.209435	1.29583	1.49489	0.148844	0.634427	0.932321	0.179688	1.68495	2.56576	0.0174555	0.142854	0.134648	-0.67829	0.947585	0.343064	0.734736	0.845718	0.497962
O95445;O95445-2	APOM	-0.37254	-0.812086	0.0670064	-1.7555	0.0927864	0.323843	0.142396	-0.24722	0.532012	0.756999	0.456909	0.825172	0.670603	0.231057	1.11015	3.16006	0.00445722	0.306139	0.983972	0.544426	1.42352	4.63673	0.00012113	0.00718705	0.74113	0.266365	1.21589	3.23333	0.00374616	0.0410624	0.497962
O95456;O95456-2	PSMG1	0.0946296	-0.682229	0.871489	0.252301	0.8031	0.907366	0.703661	0.0150493	1.39227	2.11652	0.0455891	0.432792	0.520043	-0.256816	1.2969	1.38653	0.179176	0.665122	0.796757	0.0198977	1.57362	2.12431	0.0448668	0.23294	-0.0765638	-0.915668	0.76254	-0.188991	0.851795	0.914748	0.497962
O95747	OXSR1	0.107003	-0.26482	0.478825	0.596063	0.557085	0.761314	-0.0558973	-0.385483	0.273688	-0.351282	0.728646	0.951668	0.161666	-0.210157	0.533488	0.900567	0.377362	0.776536	-0.00720905	-0.379032	0.364614	-0.0401583	0.968321	0.981584	0.012531	-0.389083	0.414145	0.0646264	0.949042	0.969467	0.497962
O95782;O95782-2	AP2A1	0.0117918	-0.227738	0.251322	0.101965	0.919688	0.962967	-0.151644	-0.363964	0.060677	-1.47933	0.152923	0.587965	-0.200897	-0.440427	0.038633	-1.73719	0.0960319	0.61312	-0.293449	-0.532979	-0.0539191	-2.5375	0.0185811	0.148649	-0.33556	-0.594282	-0.076838	-2.6864	0.0133306	0.082534	0.497962
O95810	CAVIN2	0.337789	-0.0668904	0.742468	1.72889	0.0975338	0.327953	-0.185025	-0.543735	0.173685	-1.06837	0.296688	0.736035	0.0834591	-0.32122	0.488138	0.427166	0.67332	0.92549	-0.188206	-0.592885	0.216473	-0.963288	0.345647	0.625322	-0.0550375	-0.492141	0.382066	-0.2608	0.79662	0.880735	0.497962
P00338	LDHA	-0.18859	-0.412427	0.0352463	-1.74511	0.0946172	0.32584	-0.161486	-0.359896	0.0369236	-1.6858	0.10566	0.569926	-0.117249	-0.341086	0.106588	-1.08496	0.289435	0.715548	-0.114793	-0.338629	0.109044	-1.06222	0.299408	0.593811	-0.290607	-0.532378	-0.0488356	-2.48963	0.020644	0.106511	0.27475
P00352	ALDH1A1	-0.082747	-0.29535	0.129856	-0.806152	0.428598	0.688254	0.00640529	-0.182047	0.194858	0.0703998	0.944498	0.993462	-0.0910379	-0.303641	0.121565	-0.886925	0.384506	0.78209	-0.035414	-0.248017	0.177189	-0.345016	0.733288	0.871145	-0.103137	-0.332774	0.1265	-0.930262	0.362114	0.547399	0.166512
P00390;P00390-2	GSR	-0.0867141	-0.49335	0.319922	-0.44169	0.662932	0.824348	-0.052918	-0.413363	0.307526	-0.304088	0.763857	0.954502	-0.453557	-0.860193	-0.0469203	-2.31025	0.0304135	0.451134	-0.506209	-0.912845	-0.0995724	-2.57844	0.0169713	0.140507	-0.31088	-0.750097	0.128338	-1.46604	0.15648	0.348357	0.720174
P00441	SOD1	0.0474012	-0.342077	0.436879	0.252081	0.803268	0.907366	-0.141272	-0.486507	0.203964	-0.847566	0.40561	0.80088	-0.023262	-0.41274	0.366216	-0.123708	0.902645	0.974667	-0.455824	-0.845302	-0.0663464	-2.42409	0.0238151	0.169563	-0.305611	-0.726295	0.115073	-1.50469	0.14632	0.334196	0.0962744
P00450	CP	0.304653	-0.0118784	0.621184	1.99353	0.0584704	0.286592	-0.11047	-0.391045	0.170105	-0.81551	0.423333	0.804084	0.157662	-0.15887	0.474193	1.03168	0.313192	0.731123	0.284219	-0.032312	0.60075	1.85982	0.0760414	0.313721	0.398607	0.056714	0.7405	2.41484	0.0242972	0.116889	0.960414
P00488	F13A1	-0.197524	-0.556726	0.161679	-1.13897	0.266701	0.552009	-0.256795	-0.575194	0.0616041	-1.67051	0.108679	0.574788	-0.139428	-0.498631	0.219774	-0.80398	0.429825	0.806315	-0.000268873	-0.359471	0.358934	-0.00155039	0.998777	0.999181	-0.247838	-0.635821	0.140145	-1.32309	0.199102	0.394876	0.122819
P00491	PNP	-0.0757483	-0.278001	0.126504	-0.775733	0.445988	0.688254	-0.109653	-0.288931	0.069625	-1.26686	0.21817	0.684266	-0.203482	-0.405735	-0.00122938	-2.08385	0.0487363	0.53385	-0.16773	-0.369983	0.0345224	-1.71771	0.099589	0.351577	-0.275147	-0.493605	-0.0566893	-2.60874	0.0158649	0.0910953	0.680529
P00492	HPRT1	0.0402749	-0.269323	0.349873	0.269445	0.790044	0.901461	0.173369	-0.10106	0.447798	1.3085	0.203918	0.664703	0.0689142	-0.240684	0.378512	0.461046	0.649193	0.911688	-0.0232169	-0.332815	0.286381	-0.155324	0.877951	0.941491	-0.0581264	-0.39253	0.276278	-0.360027	0.722186	0.836092	0.441478
P00558	PGK1	-0.0894928	-0.276185	0.097199	-0.992879	0.331332	0.600275	-0.0270222	-0.192507	0.138462	-0.338218	0.738336	0.951668	-0.0654226	-0.252114	0.121269	-0.725832	0.475428	0.820044	-0.0931729	-0.279865	0.0935189	-1.03371	0.312261	0.599271	-0.145873	-0.347524	0.055777	-1.49834	0.14795	0.33548	0.0401023
P00568	AK1	-0.142227	-0.346022	0.0615673	-1.44552	0.162103	0.419009	-0.127603	-0.308248	0.0530412	-1.46309	0.157279	0.589383	-0.147227	-0.351022	0.0565675	-1.49633	0.148469	0.634427	-0.17517	-0.378965	0.0286244	-1.78033	0.0885369	0.330043	-0.281042	-0.501165	-0.0609185	-2.64447	0.0146474	0.0869078	0.876962
P00734	F2	0.281722	-0.0330574	0.596501	1.85374	0.0769402	0.304341	0.0138567	-0.265165	0.292879	0.102862	0.918984	0.986362	0.247638	-0.0671411	0.562418	1.62947	0.117142	0.620476	0.344053	0.0292734	0.658832	2.26388	0.0335534	0.207739	0.531329	0.191329	0.87133	3.23682	0.00371521	0.0410624	0.876962
P00736	C1R	0.649983	0.219704	1.08026	3.12885	0.00479818	0.137172	0.496076	0.114674	0.877478	2.69401	0.013104	0.274412	0.502438	0.0721587	0.932717	2.41861	0.0240996	0.429673	0.810226	0.379947	1.24051	3.90022	0.000744459	0.0278976	1.00925	0.544491	1.474	4.49787	0.000170616	0.0063936	0.0754278
P00738	HP	1.36918	0.734578	2.00379	4.46881	0.000183299	0.043503	0.0661711	-0.496345	0.628687	0.243651	0.80971	0.954502	0.33398	-0.300624	0.968584	1.09006	0.287228	0.715548	0.22131	-0.413294	0.855914	0.722325	0.477539	0.717598	0.392108	-0.293343	1.07756	1.18485	0.248447	0.441478	0.499969
P00739;P00739-2	HPR	-1.02014	-2.06783	0.0275535	-2.01678	0.0558115	0.280001	-0.104215	-1.03289	0.824464	-0.232432	0.818304	0.954502	0.00369157	-1.044	1.05138	0.00729812	0.994241	0.997042	-0.280614	-1.32831	0.767078	-0.554765	0.584531	0.791184	0.0729732	-1.05866	1.20461	0.133564	0.894935	0.932934	0.609349
P00742	F10	0.702857	0.104836	1.30088	2.43436	0.0232902	0.213054	0.428902	-0.101187	0.958991	1.67588	0.10761	0.574788	0.511207	-0.0868143	1.10923	1.77057	0.0901869	0.600439	0.309947	-0.288074	0.907968	1.07351	0.294427	0.588854	0.909244	0.263307	1.55518	2.91558	0.00789839	0.0604694	0.246135
P00747	PLG	0.384826	0.081041	0.68861	2.62381	0.0153404	0.207718	0.185113	-0.0841635	0.454389	1.42388	0.16821	0.607945	0.41592	0.112136	0.719705	2.83582	0.00949129	0.397517	0.621402	0.317617	0.925187	4.23682	0.000324987	0.0165279	0.689562	0.361437	1.01769	4.35279	0.000244091	0.0077322	0.845718
P00748	F12	0.169819	-0.330339	0.669976	0.703255	0.489114	0.721294	0.11999	-0.323352	0.563332	0.560583	0.580624	0.882105	0.182124	-0.318033	0.682282	0.754214	0.458545	0.820044	0.114322	-0.385835	0.61448	0.473433	0.640468	0.821645	0.571533	0.0313016	1.11177	2.19127	0.0390672	0.144123	0.0410624
P00751	CFB	0.597431	0.162141	1.03272	2.84277	0.00934096	0.163153	0.0993166	-0.286527	0.48516	0.533144	0.599164	0.893236	0.398313	-0.0369771	0.833604	1.89531	0.0709772	0.599783	0.195319	-0.239971	0.630609	0.929393	0.362554	0.641739	0.728716	0.258549	1.19888	3.21025	0.00395731	0.0418445	0.914748
P00915	CA1	-0.176306	-0.381737	0.0291257	-1.7776	0.088997	0.323843	-0.0777378	-0.259833	0.104358	-0.884233	0.385926	0.79197	-0.109281	-0.314712	0.0961502	-1.10182	0.282191	0.715017	-0.0460381	-0.251469	0.159393	-0.464178	0.646982	0.827022	-0.169613	-0.391504	0.0522786	-1.58326	0.127325	0.305236	0.969467
P00918	CA2	-0.152632	-0.386685	0.0814203	-1.35072	0.190219	0.459104	-0.111959	-0.319424	0.0955069	-1.11775	0.275472	0.715585	-0.143855	-0.377908	0.0901972	-1.27305	0.216002	0.682215	-0.0421076	-0.27616	0.191945	-0.372632	0.712911	0.865902	-0.239545	-0.49235	0.013261	-1.96261	0.0621794	0.197801	0.082534
P01008	SERPINC1	0.276886	-0.552127	1.1059	0.691789	0.49615	0.723891	-0.106144	-0.840985	0.628697	-0.299182	0.767548	0.954502	0.298889	-0.530124	1.1279	0.746762	0.462943	0.820044	0.703713	-0.125299	1.53273	1.7582	0.0923166	0.337074	0.659185	-0.236251	1.55462	1.52478	0.141255	0.328169	0.880735
P01009	SERPINA1	0.481114	0.163495	0.798732	3.13744	0.0047019	0.137172	0.132625	-0.148914	0.414164	0.975709	0.339588	0.77019	0.295459	-0.0221592	0.613078	1.92675	0.0667391	0.58932	0.0930387	-0.22458	0.410657	0.606724	0.55011	0.768506	0.385065	0.0419977	0.728132	2.32482	0.0294844	0.123488	0.106511
P01011	SERPINA3	0.583414	0.199493	0.967336	3.14752	0.0045913	0.137172	0.14116	-0.19915	0.48147	0.859152	0.399322	0.79197	0.180906	-0.203016	0.564827	0.975987	0.339453	0.753092	0.252281	-0.13164	0.636203	1.36106	0.186979	0.459065	0.385571	-0.0291115	0.800254	1.92585	0.0668575	0.206426	0.547399
P01019	AGT	0.550725	0.151772	0.949679	2.85922	0.00899475	0.163153	0.325468	-0.0281664	0.679102	1.90628	0.0694717	0.511515	0.424788	0.0258351	0.823742	2.20538	0.0379346	0.509613	0.679862	0.280909	1.07882	3.52966	0.0018388	0.0405636	0.962237	0.531318	1.39316	4.62509	0.000124656	0.00633963	0.348357
P01023	A2M	0.228851	-0.171279	0.628982	1.18464	0.248529	0.53299	0.127402	-0.227276	0.48208	0.744003	0.464578	0.826948	0.197879	-0.202252	0.598009	1.02431	0.316581	0.734221	0.404583	0.00445279	0.804714	2.09431	0.0477083	0.239584	0.485796	0.053606	0.917987	2.32816	0.0292747	0.123335	0.334196
P01024	C3	0.562672	0.182012	0.943331	3.06162	0.00562035	0.137172	0.2501	-0.0873183	0.587519	1.53525	0.138672	0.581747	0.265994	-0.114665	0.646654	1.44734	0.161599	0.635041	0.17689	-0.20377	0.557549	0.962497	0.346035	0.625322	0.787019	0.375859	1.19818	3.96468	0.000635424	0.0129263	0.116889
P01031	C5	0.514733	0.16973	0.859736	3.09024	0.005255	0.137172	0.0345199	-0.271293	0.340333	0.233802	0.817254	0.954502	0.313689	-0.0313141	0.658692	1.88326	0.0726624	0.599783	0.546807	0.201804	0.89181	3.2828	0.00332961	0.0538792	0.692973	0.320327	1.06562	3.85171	0.000838545	0.014562	0.394876
P01042	KNG1	0.312379	-0.00826791	0.633027	2.01785	0.0556923	0.280001	0.128892	-0.155332	0.413115	0.93929	0.357561	0.776892	0.208317	-0.11233	0.528965	1.34565	0.191826	0.669511	0.332482	0.0118344	0.653129	2.1477	0.0427577	0.225507	0.787149	0.44081	1.13349	4.70749	0.000101747	0.00633963	0.0910953
P01042-2	KNG1	0.405195	-0.23095	1.04134	1.31929	0.200345	0.475486	-0.00785737	-0.571739	0.556024	-0.0288618	0.977229	0.993462	0.479482	-0.156663	1.11563	1.56117	0.132446	0.620476	0.151305	-0.484839	0.78745	0.492643	0.62704	0.81611	0.821834	0.13472	1.50895	2.47736	0.0212062	0.108625	0.836092
P01591	JCHAIN	0.30264	-0.288879	0.894159	1.05972	0.300521	0.579069	0.18178	-0.342545	0.706106	0.718091	0.480095	0.831697	-0.575563	-1.16708	0.0159563	-2.01538	0.0559685	0.568163	-0.682353	-1.27387	-0.0908344	-2.38932	0.0256748	0.175774	0.249374	-0.389539	0.888288	0.808431	0.427312	0.609349	0.33548
P01596	IGKV1-5	0.369621	-0.0414856	0.780729	1.86224	0.0756859	0.304341	-0.0442903	-0.408698	0.320117	-0.251742	0.803527	0.954502	-0.0392955	-0.450403	0.371812	-0.19798	0.844839	0.967635	-0.304246	-0.715353	0.106861	-1.53286	0.139257	0.404697	0.334383	-0.109664	0.778429	1.55973	0.132786	0.315145	0.0869078
P01598	IGKV1-5	0.231826	-0.170006	0.633658	1.19496	0.244554	0.526412	0.015503	-0.340683	0.371689	0.0901518	0.928965	0.988674	0.0305549	-0.371277	0.432386	0.157496	0.876259	0.974667	-0.313403	-0.715234	0.0884287	-1.61545	0.120157	0.384209	0.346899	-0.0871283	0.780927	1.65546	0.111719	0.284086	0.0410624
P01601	IGKV1D-16	-0.0427355	-0.619509	0.534038	-0.153468	0.879398	0.951567	-0.390582	-0.901837	0.120673	-1.58237	0.127528	0.574788	-0.134584	-0.711358	0.442189	-0.483307	0.633549	0.905798	-0.783977	-1.36075	-0.207204	-2.81535	0.00994694	0.101175	0.028082	-0.594905	0.651069	0.0933649	0.92644	0.953216	0.0063936
P01608	IGKV1D-33	0.0244288	-0.685172	0.73403	0.0713052	0.943785	0.977046	-0.179862	-0.808855	0.449132	-0.592278	0.559572	0.8729	-0.452174	-1.16177	0.257427	-1.31985	0.200162	0.68199	-0.114048	-0.823649	0.595553	-0.332895	0.742297	0.875026	0.46418	-0.302276	1.23064	1.25439	0.222581	0.421631	0.441478
P01610	IGKV1-17	0.341666	0.0558303	0.627501	2.47582	0.0212776	0.213054	0.0980586	-0.155307	0.351424	0.801625	0.431159	0.81056	-0.0375624	-0.323398	0.248273	-0.27219	0.787959	0.948326	-0.23507	-0.520906	0.050765	-1.7034	0.102275	0.352377	0.456828	0.14809	0.765565	3.06476	0.00557912	0.0490412	0.932934
P01611	IGKV1D-12	-0.0605929	-1.08411	0.962922	-0.12262	0.903497	0.962325	-0.148213	-1.05546	0.759035	-0.338372	0.738221	0.951668	-0.447444	-1.47096	0.576071	-0.905478	0.374811	0.773523	-0.607973	-1.63149	0.415541	-1.23034	0.231285	0.510206	0.971101	-0.134421	2.07662	1.81941	0.0821881	0.238849	0.0604694
P01612	IGKV1-39	0.64886	0.0859109	1.21181	2.38735	0.0257843	0.213054	-0.0439382	-0.542939	0.455063	-0.182379	0.856919	0.963865	0.42901	-0.133939	0.991959	1.57845	0.128425	0.620476	-0.432873	-0.995822	0.130076	-1.59267	0.125193	0.389638	0.175648	-0.432406	0.783702	0.598321	0.555604	0.720174	0.0077322
P01613	IGKV1D-33	0.114764	-0.376493	0.606021	0.483872	0.633155	0.805011	0.0628826	-0.37257	0.498335	0.299105	0.767607	0.954502	0.278274	-0.212983	0.76953	1.17327	0.252965	0.690446	-0.12086	-0.612117	0.370397	-0.509574	0.615314	0.811303	0.206055	-0.324562	0.736673	0.804333	0.429625	0.609349	0.144123
P01614	IGKV2D-40	0.111458	-0.350569	0.573486	0.499664	0.622165	0.799606	-0.0405015	-0.450045	0.369042	-0.204835	0.839543	0.959478	0.151276	-0.310752	0.613304	0.678165	0.504585	0.836726	-0.114659	-0.576687	0.347369	-0.514013	0.612257	0.811303	0.185086	-0.313961	0.684133	0.768185	0.450369	0.631225	0.0418445
P01622	IGKV3-20	0.574836	0.192926	0.956745	3.11758	0.00492748	0.137172	0.204047	-0.13448	0.542573	1.24845	0.224708	0.684266	-0.00253833	-0.384448	0.379371	-0.0137665	0.989138	0.995632	0.00365247	-0.378257	0.385562	0.0198089	0.984371	0.988756	0.0736785	-0.338831	0.486188	0.369948	0.714882	0.831674	0.305236
P01624	IGKV3-15	-0.51504	-1.30475	0.27467	-1.35085	0.190179	0.459104	-0.0143236	-0.714327	0.685679	-0.0423825	0.966568	0.993462	-0.155002	-0.944712	0.634707	-0.406541	0.688188	0.930987	-0.334658	-1.12437	0.455052	-0.877742	0.389364	0.66164	-0.0967377	-0.949722	0.756246	-0.234903	0.81641	0.890174	0.197801
P01625	IGKV4-1	0.440194	-0.580518	1.46091	0.893253	0.381181	0.647734	-0.0314111	-0.936175	0.873353	-0.0719088	0.94331	0.993462	-0.441668	-1.46238	0.579044	-0.896244	0.379616	0.776685	-0.658125	-1.67884	0.362587	-1.33549	0.195077	0.46924	0.149237	-0.953258	1.25173	0.280371	0.781756	0.877158	0.328169
P01700	IGLV1-47	0.11488	-0.62466	0.854419	0.321748	0.750615	0.878101	0.0298952	-0.625637	0.685427	0.0944585	0.925581	0.986548	-0.00589236	-0.745432	0.733647	-0.0165029	0.986979	0.995632	0.113201	-0.626339	0.85274	0.317045	0.754134	0.880235	0.000408594	-0.798385	0.799203	0.00105948	0.999164	0.999164	0.123488
P01702;P06316	IGLV1-51	0.264058	-0.242785	0.7709	1.0791	0.291983	0.573563	0.0657869	-0.383481	0.515055	0.303297	0.764452	0.954502	-0.0604032	-0.567246	0.446439	-0.246843	0.807269	0.954777	-0.671159	-1.178	-0.164317	-2.74275	0.0117361	0.114468	0.11701	-0.430442	0.664463	0.442701	0.66221	0.79779	0.206426
P01703	IGLV1-40	0.0432021	-0.459163	0.545567	0.178123	0.860221	0.942273	0.382923	-0.0623761	0.828222	1.78112	0.0884048	0.55439	0.40737	-0.0949953	0.909735	1.67959	0.106878	0.61312	0.202418	-0.299947	0.704783	0.834571	0.412737	0.680297	0.368004	-0.174613	0.91062	1.40473	0.173763	0.370008	0.00633963
P01705	IGLV2-23	-0.489277	-1.02872	0.050166	-1.87864	0.073318	0.299111	-0.36118	-0.839345	0.116985	-1.56451	0.13166	0.574788	-0.497034	-1.03648	0.0424088	-1.90842	0.0691817	0.599783	-0.697391	-1.23683	-0.157948	-2.67772	0.0135938	0.120985	-0.326706	-0.909371	0.255959	-1.16137	0.257668	0.448225	0.123335
P01708	IGLV2-11	0.386078	-0.384021	1.15618	1.0384	0.310122	0.585206	0.152768	-0.529852	0.835387	0.463539	0.647433	0.909956	-0.157108	-0.927207	0.612991	-0.422558	0.67663	0.927932	-0.143142	-0.913241	0.626957	-0.384995	0.703858	0.859129	-0.0540654	-0.885867	0.777737	-0.134627	0.894104	0.932934	0.0129263
P01714	IGLV3-19	0.133095	-0.24701	0.513201	0.725257	0.475774	0.708684	0.0785094	-0.258418	0.415437	0.482635	0.634019	0.909956	0.00779343	-0.372312	0.387899	0.0424676	0.966501	0.990977	-0.316422	-0.696528	0.0636838	-1.72423	0.0983861	0.351577	0.233181	-0.17738	0.643742	1.17638	0.251743	0.442571	0.014562
P01717	IGLV3-25	0.374002	-0.0833038	0.831308	1.69395	0.104081	0.333808	0.147332	-0.258026	0.55269	0.75282	0.459366	0.825172	-0.0782363	-0.535542	0.379069	-0.354353	0.726376	0.930987	-0.167194	-0.624499	0.290112	-0.757263	0.456753	0.699584	0.213244	-0.280703	0.707191	0.894192	0.380689	0.561182	0.00633963
P01719	IGLV3-21	0.0347903	-0.387513	0.457093	0.170635	0.866037	0.945733	0.336385	-0.0379465	0.710717	1.86129	0.0758254	0.525003	0.0734143	-0.348889	0.495717	0.360073	0.722152	0.930987	0.0359631	-0.38634	0.458266	0.176387	0.861569	0.936866	0.227892	-0.228248	0.684031	1.03482	0.311752	0.49436	0.108625
P01742;P01761;P06326	IGHV1-69	0.283002	-0.07681	0.642813	1.6291	0.11722	0.358202	0.230958	-0.0879806	0.549897	1.49989	0.147551	0.581747	0.128775	-0.231036	0.488587	0.741295	0.466185	0.820044	0.0787862	-0.281025	0.438598	0.453533	0.654511	0.831205	0.334573	-0.0540678	0.723214	1.7831	0.0880734	0.247737	0.609349
P01743	IGHV1-46	0.122179	-0.30128	0.545638	0.597612	0.556069	0.761314	0.0115917	-0.363765	0.386948	0.0639641	0.949564	0.993462	0.077067	-0.346392	0.500526	0.376956	0.70974	0.930987	0.112948	-0.310512	0.536407	0.552458	0.586084	0.791184	0.312205	-0.145183	0.769593	1.4138	0.171114	0.370008	0.315145
P01762	IGHV3-11	0.0175357	-0.326809	0.361881	0.105479	0.916931	0.962325	0.0385587	-0.266671	0.343788	0.261655	0.795969	0.954502	-0.0915811	-0.435926	0.252764	-0.550866	0.587157	0.874596	-0.381316	-0.725661	-0.0369711	-2.29364	0.0315059	0.202092	0.161086	-0.210849	0.533021	0.897067	0.379186	0.560882	0.284086
P01763	IGHV3-48	0.470253	-0.817093	1.7576	0.756607	0.457139	0.695365	0.462171	-0.678939	1.60328	0.838897	0.410355	0.802066	-0.181996	-1.46934	1.10535	-0.29282	0.772344	0.946487	-0.0623111	-1.34966	1.22503	-0.100255	0.921031	0.972958	0.583315	-0.807178	1.97381	0.868896	0.394082	0.573797	0.953216
P01764	IGHV3-23	0.141714	-0.175965	0.459394	0.923971	0.365309	0.632847	-0.00595114	-0.287544	0.275642	-0.0437736	0.965471	0.993462	-0.226298	-0.543978	0.0913816	-1.47545	0.153955	0.634427	-0.235885	-0.553565	0.0817946	-1.53796	0.13801	0.404697	0.0675771	-0.275556	0.41071	0.407916	0.687193	0.81119	0.421631
P01765	IGHV3-23	-0.0229088	-0.44245	0.396633	-0.1131	0.910955	0.962325	-0.009326	-0.38121	0.362558	-0.0519424	0.959033	0.993462	0.00486781	-0.414674	0.424409	0.0240321	0.981039	0.994361	-0.144045	-0.563587	0.275496	-0.711144	0.484306	0.717791	-0.0490098	-0.502166	0.404147	-0.22401	0.824772	0.895247	0.0490412
P01766	IGHV3-13	0.0879947	-0.208721	0.38471	0.614256	0.54521	0.760763	0.137172	-0.125838	0.400183	1.08026	0.291477	0.733326	0.175213	-0.121503	0.471929	1.22309	0.233956	0.682215	-0.146451	-0.443166	0.150265	-1.02231	0.317504	0.603456	0.169396	-0.151094	0.489886	1.09477	0.285204	0.468077	0.238849
P01767	IGHV3-53	0.63235	-0.0361164	1.30082	1.95935	0.0625821	0.287759	0.17402	-0.418512	0.766553	0.608306	0.549079	0.8707	0.116606	-0.55186	0.785073	0.361306	0.721243	0.930987	0.813102	0.144636	1.48157	2.51941	0.019337	0.148751	0.430291	-0.291735	1.15232	1.23436	0.22981	0.424387	0.720174
P01770	IGHV3-30	0.0169337	-0.355776	0.389643	0.0941056	0.925859	0.96517	0.131093	-0.199278	0.461465	0.821886	0.41977	0.804084	0.0238974	-0.348812	0.396607	0.132805	0.895529	0.974667	-0.201216	-0.573925	0.171494	-1.11821	0.275278	0.563212	0.0940724	-0.3085	0.496645	0.484007	0.63306	0.779825	0.609349
P01781	IGHV3-7	-0.13276	-0.622675	0.357155	-0.561281	0.580156	0.777912	-0.088997	-0.52326	0.345266	-0.424478	0.67525	0.92198	-0.0480151	-0.53793	0.4419	-0.202997	0.840962	0.967635	-0.333635	-0.82355	0.15628	-1.41054	0.172063	0.449237	0.0444379	-0.484731	0.573607	0.173937	0.863471	0.919849	0.631225
P01824	IGHV4-39	0.721628	0.0962526	1.347	2.39005	0.0256347	0.213054	0.290455	-0.263881	0.844791	1.08527	0.289297	0.730425	0.204399	-0.420976	0.829775	0.676975	0.505326	0.836726	0.24968	-0.375695	0.875056	0.826946	0.416955	0.682441	0.0571249	-0.618358	0.732608	0.175164	0.862518	0.919849	0.831674
P01834	IGKC	0.195296	-0.0911605	0.481753	1.41211	0.171605	0.431742	-0.141452	-0.395369	0.112465	-1.15386	0.260674	0.710849	-0.081426	-0.367883	0.205031	-0.588759	0.56189	0.8632	-0.472174	-0.758631	-0.185717	-3.4141	0.00243056	0.0443733	0.127451	-0.181958	0.43686	0.853185	0.402552	0.583742	0.890174
P01857	IGHG1	0.259418	-0.081739	0.600575	1.575	0.129221	0.368591	0.0255926	-0.276811	0.327996	0.175292	0.862419	0.966211	0.0180324	-0.323124	0.359189	0.10948	0.913793	0.975443	-0.27682	-0.617977	0.0643372	-1.68065	0.10667	0.363391	0.163741	-0.204751	0.532232	0.920371	0.367146	0.550986	0.877158
P01859	IGHG2	0.298164	-0.0519421	0.64827	1.76396	0.0913195	0.323843	0.0359656	-0.27437	0.346301	0.240043	0.812471	0.954502	0.0301248	-0.319981	0.380231	0.178221	0.860145	0.9718	-0.234745	-0.584851	0.115361	-1.38877	0.178504	0.450433	0.249675	-0.128483	0.627833	1.36753	0.184973	0.381741	0.999164
P01860	IGHG3	0.252845	-0.243372	0.749061	1.0554	0.302449	0.580442	0.264015	-0.175833	0.703864	1.24325	0.22658	0.684266	0.270742	-0.225474	0.766959	1.13011	0.270341	0.705065	-0.109216	-0.605432	0.387001	-0.455877	0.65285	0.831205	0.439235	-0.0967402	0.975209	1.69741	0.103417	0.27475	0.79779
P01861	IGHG4	0.162249	-0.186086	0.510584	0.964757	0.344926	0.610914	-0.0235723	-0.332338	0.285194	-0.158127	0.875768	0.974292	-0.200003	-0.548338	0.148332	-1.18925	0.246746	0.688953	-0.320698	-0.669033	0.0276367	-1.90692	0.0693848	0.308023	-0.026243	-0.402488	0.350002	-0.14447	0.886417	0.931009	0.370008
P01871	IGHM	0.0964228	-0.269852	0.462697	0.545264	0.590939	0.783454	0.0760167	-0.248651	0.400684	0.484958	0.632397	0.909956	-0.0264123	-0.392687	0.339862	-0.14936	0.882601	0.974667	-0.127606	-0.493881	0.238668	-0.721603	0.477974	0.717598	0.23907	-0.156551	0.634692	1.25164	0.223564	0.421631	0.448225
P01876	IGHA1	0.298948	0.0621803	0.535717	2.61521	0.0156376	0.207718	-0.00985168	-0.219724	0.200021	-0.0972274	0.923407	0.986362	0.00294538	-0.233823	0.239714	0.0257663	0.979671	0.994361	0.0912958	-0.145472	0.328064	0.798659	0.432842	0.685951	0.0916144	-0.164124	0.347353	0.741995	0.46577	0.647711	0.932934
P01877	IGHA2	1.39285	0.365968	2.41972	2.80943	0.0100825	0.163153	0.772679	-0.13755	1.68291	1.75826	0.0923069	0.55697	1.60724	0.580359	2.63411	3.24186	0.00367084	0.306139	1.28453	0.25765	2.3114	2.59095	0.0165062	0.138376	0.39519	-0.713964	1.50434	0.737985	0.468154	0.648952	0.442571
P02008	HBZ	-0.453193	-1.2823	0.375916	-1.13215	0.269497	0.556175	-0.434726	-1.16965	0.3002	-1.2252	0.233179	0.684266	-0.513902	-1.34301	0.315207	-1.28381	0.212276	0.682215	-0.418608	-1.24772	0.410501	-1.04576	0.306784	0.596935	-0.107654	-1.00319	0.787886	-0.248987	0.80563	0.887881	0.561182
P02042	HBD	-0.0121589	-0.215002	0.190684	-0.124156	0.902295	0.962325	-0.0491487	-0.22895	0.130653	-0.566178	0.57688	0.882045	-0.0550688	-0.257912	0.147774	-0.562313	0.579465	0.874108	-0.0632175	-0.266061	0.139626	-0.645521	0.525121	0.747216	-0.135681	-0.354776	0.083415	-1.28268	0.212667	0.413275	0.49436
P02042;P68871	HBB;HBD	0.163916	-0.295941	0.623772	0.738298	0.467968	0.701459	-0.224706	-0.632325	0.182913	-1.14181	0.265544	0.712099	-0.259585	-0.719441	0.200271	-1.16921	0.254564	0.690446	-0.199084	-0.658941	0.260772	-0.896704	0.379376	0.65562	-0.299415	-0.796116	0.197286	-1.24857	0.224665	0.421631	0.247737
P02533	KRT14	2.44848	0.794041	4.10292	3.06534	0.00557151	0.137172	0.622666	-0.843839	2.08917	0.879438	0.388464	0.79197	0.85781	-0.796631	2.51225	1.07392	0.294245	0.717018	0.0732178	-1.58122	1.72766	0.0916641	0.927777	0.974967	0.49062	-1.29638	2.27762	0.568662	0.575221	0.730049	0.370008
P02549	SPTA1	-0.257006	-0.442319	-0.0716935	-2.87258	0.00872239	0.163153	-0.151744	-0.316006	0.0125188	-1.9134	0.0685106	0.511515	-0.186951	-0.372264	-0.00163763	-2.08956	0.0481723	0.53385	-0.199798	-0.385111	-0.0144847	-2.23315	0.0357936	0.211187	-0.312433	-0.512594	-0.112273	-3.23305	0.00374867	0.0410624	0.560882
P02647	APOA1	0.00191906	-0.280588	0.284426	0.0140699	0.988898	0.996347	0.190992	-0.0594239	0.441408	1.57975	0.128128	0.574788	0.280948	-0.00155968	0.563455	2.05982	0.0511731	0.552049	0.796764	0.514257	1.07927	5.84163	6.48e-06	0.000768716	0.639891	0.334748	0.945033	4.34346	0.000249776	0.0077322	0.573797
P02649	APOE	0.397235	-0.0391523	0.833622	1.88542	0.0723569	0.297806	0.413028	0.0262124	0.799845	2.21161	0.0374445	0.407184	1.07759	0.641206	1.51398	5.11466	3.75e-05	0.0207081	1.85588	1.41949	2.29226	8.80867	9.56e-09	6.81e-06	1.30199	0.830633	1.77334	5.72129	8.63e-06	0.00122931	0.81119
P02652	APOA2	0.325391	0.0228115	0.62797	2.22741	0.0362273	0.230302	0.449498	0.18129	0.717706	3.47128	0.00211758	0.135526	0.397905	0.0953256	0.700484	2.72379	0.0122513	0.401974	0.60348	0.300901	0.90606	4.13102	0.00042189	0.0187741	1.09964	0.772818	1.42646	6.96902	4.76e-07	0.000169466	0.895247
P02654	APOC1	0.323254	-0.0661594	0.712668	1.71936	0.0992842	0.327953	0.450659	0.105481	0.795837	2.7042	0.0128062	0.274412	0.582455	0.193042	0.971869	3.09803	0.00515964	0.306139	0.970013	0.5806	1.35943	5.15941	3.36e-05	0.00280516	1.27452	0.853905	1.69513	6.27619	2.33e-06	0.000414064	0.468077
P02655	APOC2	0.173537	-0.416424	0.763497	0.60926	0.548458	0.760763	0.20022	-0.322724	0.723164	0.793025	0.43605	0.814876	0.761062	0.171102	1.35102	2.67197	0.0137707	0.401974	1.46322	0.873261	2.05318	5.13713	3.55e-05	0.00280516	1.2693	0.632069	1.90653	4.12574	0.000427425	0.0112714	0.424387
P02656	APOC3	0.00603474	-0.541145	0.553214	0.0228435	0.981977	0.993264	0.0362285	-0.448795	0.521252	0.154711	0.878429	0.975728	0.585763	0.0385831	1.13294	2.21731	0.0370016	0.506638	1.57429	1.02711	2.12147	5.95922	4.9e-06	0.00069775	0.963329	0.372308	1.55435	3.37602	0.00266357	0.0364704	0.779825
P02671	FGA	-0.778507	-1.59799	0.0409758	-1.96769	0.0615559	0.287759	-0.911786	-1.63818	-0.185393	-2.59989	0.016181	0.320024	-0.0990424	-0.918525	0.72044	-0.250331	0.804604	0.954777	-0.348843	-1.16833	0.47064	-0.881706	0.387262	0.660361	-0.479379	-1.36452	0.405763	-1.12176	0.273799	0.459776	0.919849
P02675	FGB	-0.985007	-1.90604	-0.0639707	-2.21512	0.0371715	0.231377	-1.01671	-1.83312	-0.200294	-2.57941	0.016935	0.325884	-0.0828022	-1.00384	0.838234	-0.186208	0.853951	0.971267	-0.310461	-1.2315	0.610575	-0.698175	0.492224	0.719638	-0.575288	-1.57012	0.419545	-1.19776	0.243483	0.438885	0.919849
P02679	FGG	-0.963842	-1.90243	-0.0252518	-2.12698	0.0446211	0.250159	-1.09414	-1.92611	-0.262165	-2.72394	0.0122473	0.274412	-0.0462354	-0.984825	0.892355	-0.102031	0.919636	0.976299	-0.362206	-1.3008	0.576384	-0.799308	0.432473	0.685951	-0.601063	-1.61486	0.41273	-1.22802	0.232138	0.425985	0.583742
P02724;P02724-2;P02724-3	GYPA	0.0299129	-0.600119	0.659945	0.09834	0.922534	0.963951	-0.314965	-0.873429	0.243499	-1.16816	0.254978	0.704288	0.336514	-0.293518	0.966546	1.1063	0.280289	0.714639	0.18572	-0.444312	0.815752	0.610563	0.54761	0.768506	-0.0974205	-0.777933	0.583092	-0.296516	0.769557	0.871789	0.550986
P02730	SLC4A1	-0.17475	-0.400575	0.0510755	-1.60279	0.122933	0.363418	-0.0217177	-0.22189	0.178455	-0.224721	0.824226	0.954502	-0.0793691	-0.305194	0.146456	-0.727969	0.474144	0.820044	-0.0661277	-0.291953	0.159697	-0.60652	0.550244	0.768506	-0.28592	-0.529839	-0.0420009	-2.42791	0.0236185	0.114397	0.381741
P02743	APCS	0.524904	-0.0670238	1.11683	1.83673	0.079503	0.309323	0.0117037	-0.512985	0.536392	0.0462013	0.963558	0.993462	-0.0970046	-0.688933	0.494924	-0.339435	0.737431	0.931808	-0.74586	-1.33779	-0.153932	-2.60989	0.0158243	0.135746	0.235935	-0.40342	0.875291	0.764335	0.452613	0.633125	0.27475
P02745	C1QA	0.201853	-0.425837	0.829543	0.666075	0.512138	0.738142	0.395725	-0.160663	0.952112	1.47316	0.154567	0.587965	0.171694	-0.455996	0.799384	0.566556	0.576627	0.873528	-0.0241287	-0.651819	0.603561	-0.0796201	0.937244	0.976886	0.0782957	-0.599687	0.756278	0.239196	0.81312	0.889311	0.931009
P02746	C1QB	0.341873	-0.000280175	0.684026	2.06956	0.0501725	0.268592	0.247404	-0.0558821	0.550691	1.68962	0.104918	0.569926	0.390975	0.0488214	0.733128	2.3668	0.02695	0.436101	0.368093	0.0259402	0.710247	2.22829	0.0361606	0.211187	0.687801	0.318233	1.05737	3.85481	0.000832207	0.014562	0.421631
P02747	C1QC	0.509166	0.12274	0.895593	2.72915	0.0121036	0.183357	0.301967	-0.040563	0.644497	1.82597	0.0811613	0.534953	0.50364	0.117214	0.890067	2.69953	0.0129418	0.401974	0.527151	0.140725	0.913577	2.82555	0.00971738	0.101118	0.856941	0.439553	1.27433	4.2525	0.000312651	0.00923103	0.647711
P02748	C9	0.703543	0.254793	1.15229	3.24728	0.0036238	0.137172	-0.305599	-0.703374	0.0921751	-1.59129	0.125504	0.574788	0.55926	0.11051	1.00801	2.58133	0.0168629	0.401974	0.529476	0.0807262	0.978226	2.44386	0.022814	0.166806	0.113678	-0.371027	0.598383	0.485772	0.631828	0.779825	0.648952
P02749	APOH	0.382308	0.0570695	0.707546	2.4347	0.0232728	0.213054	0.0297341	-0.258559	0.318027	0.213626	0.832763	0.954502	0.238571	-0.0866674	0.56381	1.51932	0.142616	0.630699	0.0778078	-0.247431	0.403046	0.495513	0.625045	0.81611	0.660643	0.309345	1.01194	3.89516	0.000753773	0.0141233	0.887881
P02750	LRG1	0.978404	0.530695	1.42611	4.52643	0.000159002	0.043503	0.0930425	-0.303809	0.489894	0.485609	0.631942	0.909956	0.675425	0.227716	1.12313	3.12475	0.00484485	0.306139	0.601835	0.154126	1.04954	2.78429	0.010678	0.107081	0.620571	0.13699	1.10415	2.65801	0.0142095	0.0850181	0.413275
P02751	FN1	-0.106001	-0.621604	0.409603	-0.42582	0.674286	0.829174	-0.0109232	-0.467957	0.44611	-0.0495036	0.960955	0.993462	-0.0634872	-0.579091	0.452116	-0.255038	0.801012	0.953713	-0.494065	-1.00967	0.0215387	-1.98473	0.0595051	0.28058	0.71914	0.162225	1.27606	2.6746	0.0136896	0.0833075	0.421631
P02751;P02751-14;P02751-17;P02751-3;P02751-8;P02751-9	FN1	-0.138279	-0.80327	0.526712	-0.430699	0.670787	0.82773	0.0189872	-0.570465	0.608439	0.0667183	0.947395	0.993462	-0.0172401	-0.682231	0.647751	-0.0536979	0.95765	0.989618	-0.169057	-0.834048	0.495934	-0.526564	0.603652	0.804869	0.967783	0.24951	1.68606	2.79076	0.0105218	0.0741732	0.421631
P02753	RBP4	0.654101	0.131713	1.17649	2.59349	0.016413	0.209988	0.617724	0.154676	1.08077	2.76314	0.011205	0.274412	0.925618	0.40323	1.44801	3.67005	0.00130737	0.216957	1.41238	0.88999	1.93477	5.60004	1.15e-05	0.00117444	1.27456	0.710314	1.8388	4.67872	0.000109222	0.00633963	0.730049
P02760	AMBP	0.760354	0.171668	1.34904	2.67526	0.0136692	0.202759	0.0497065	-0.472108	0.571521	0.197302	0.845364	0.963038	0.111822	-0.476864	0.700508	0.39344	0.6977	0.930987	-0.073242	-0.661928	0.515444	-0.257697	0.798984	0.89769	0.71144	0.0755865	1.34729	2.31747	0.0299494	0.12402	0.0410624
P02763	ORM1	0.89792	0.309002	1.48684	3.15803	0.00447863	0.137172	-0.014514	-0.536534	0.507506	-0.057588	0.954585	0.993462	-0.437816	-1.02673	0.151103	-1.53982	0.137557	0.62676	-0.662162	-1.25108	-0.0732433	-2.32886	0.0292313	0.194511	-0.106686	-0.74279	0.529419	-0.347385	0.731532	0.844167	0.0077322
P02765	AHSG	0.271862	-0.0460358	0.589759	1.77131	0.0900614	0.323843	0.45312	0.171334	0.734906	3.33064	0.0029698	0.135526	0.240865	-0.0770323	0.558763	1.56935	0.130529	0.620476	-0.0589185	-0.376816	0.258979	-0.383882	0.704671	0.859129	0.869453	0.526085	1.21282	5.24468	2.73e-05	0.00277485	0.00122931
P02766	TTR	0.213279	-0.110485	0.537043	1.36444	0.185929	0.45774	0.479242	0.192255	0.766228	3.45881	0.00218228	0.135526	0.264781	-0.0589832	0.588545	1.69392	0.104088	0.61312	0.497943	0.174179	0.821707	3.18555	0.00419614	0.063567	0.766943	0.417238	1.11665	4.5425	0.000152822	0.0063936	0.000169466
P02768	ALB	0.372465	0.0328617	0.712069	2.27168	0.033005	0.228151	0.333111	0.0320845	0.634137	2.29202	0.0316144	0.407184	0.391311	0.0517077	0.730915	2.38662	0.0258246	0.429673	0.338815	-0.000788504	0.678419	2.06645	0.0504904	0.251393	0.567794	0.200981	0.934608	3.20612	0.00399638	0.0418445	0.000414064
P02774;P02774-3	GC	0.422738	0.0468402	0.798635	2.32935	0.0292003	0.218849	0.284728	-0.0484691	0.617926	1.76996	0.0902919	0.55439	0.242444	-0.133453	0.618342	1.33591	0.194941	0.677065	0.310542	-0.0653561	0.686439	1.71113	0.100816	0.351577	0.587965	0.181949	0.993981	2.99945	0.00650013	0.0542968	0.0112714
P02775	PPBP	-0.428834	-0.92892	0.0712523	-1.77614	0.0892421	0.323843	-0.535389	-0.978668	-0.0921105	-2.50165	0.0201069	0.349174	0.0277143	-0.472372	0.5278	0.114787	0.909633	0.974667	-0.244439	-0.744525	0.255647	-1.01242	0.322107	0.60833	-0.236848	-0.777002	0.303307	-0.908206	0.373399	0.556193	0.0364704
P02776	PF4	-0.364394	-0.831658	0.102869	-1.61526	0.120197	0.360009	-0.532582	-0.946767	-0.118397	-2.66334	0.0140404	0.285622	-0.0122899	-0.479553	0.454973	-0.0544778	0.957036	0.989618	-0.192572	-0.659835	0.274692	-0.853619	0.402316	0.675588	-0.242938	-0.74764	0.261764	-0.996999	0.329372	0.512036	0.459776
P02787	TF	0.110752	-0.267785	0.48929	0.606008	0.550578	0.760763	-0.218353	-0.553891	0.117184	-1.34788	0.191117	0.644586	0.108839	-0.269698	0.487377	0.59554	0.557429	0.8632	-0.00470524	-0.383243	0.373832	-0.0257458	0.979687	0.986616	0.276483	-0.132384	0.685351	1.40062	0.174975	0.370008	0.438885
P02790	HPX	0.850599	0.471233	1.22997	4.64408	0.000118955	0.043503	0.460292	0.12402	0.796565	2.83515	0.00950575	0.268109	0.488737	0.10937	0.868103	2.66839	0.0138818	0.401974	0.357041	-0.0223258	0.736407	1.94936	0.0638307	0.29321	0.789887	0.380124	1.19965	3.9927	0.000593124	0.0124207	0.425985
P03951;P03951-2	F11	0.24114	-0.744948	1.22723	0.506509	0.617429	0.797839	0.291028	-0.583045	1.1651	0.689638	0.497477	0.838434	0.125618	-0.86047	1.11171	0.263858	0.794292	0.949275	0.852235	-0.133853	1.83832	1.7901	0.0869117	0.330043	1.14975	0.0846569	2.21485	2.23588	0.035589	0.135505	0.871789
P03952	KLKB1	0.333662	-0.13208	0.799405	1.48387	0.151725	0.400463	0.136842	-0.275995	0.549678	0.686552	0.499383	0.838434	0.190967	-0.274776	0.656709	0.849269	0.404681	0.789406	0.451569	-0.0141732	0.917312	2.00822	0.0567773	0.277742	1.00922	0.506157	1.51228	4.15526	0.000397415	0.0108831	0.114397
P04003	C4BPA	0.298072	-0.148194	0.744338	1.38344	0.180109	0.449956	-0.0459591	-0.441532	0.349614	-0.240646	0.81201	0.954502	0.278924	-0.167343	0.72519	1.29457	0.208604	0.682215	0.178263	-0.268003	0.624529	0.827372	0.416719	0.682441	0.203474	-0.278548	0.685497	0.874331	0.391179	0.570737	0.633125
P04004	VTN	0.692954	0.310785	1.07512	3.75563	0.00106092	0.0944219	0.577737	0.238981	0.916493	3.53245	0.00182639	0.135526	0.559425	0.177256	0.941593	3.03194	0.00602511	0.30642	0.28309	-0.0990784	0.665259	1.53428	0.13891	0.404697	0.802737	0.389947	1.21553	4.0279	0.000543912	0.012069	0.889311
P04040	CAT	-0.0800188	-0.300298	0.140261	-0.752405	0.459611	0.695664	-0.0911143	-0.286371	0.104143	-0.966527	0.34406	0.772778	-0.110175	-0.330455	0.110104	-1.03596	0.311232	0.728938	-0.152093	-0.372373	0.0681865	-1.43011	0.166433	0.446695	-0.218218	-0.456147	0.0197114	-1.89966	0.0703766	0.214137	0.014562
P04075	ALDOA	-0.124189	-0.330298	0.08192	-1.24801	0.224863	0.508262	-0.141253	-0.323949	0.041443	-1.60141	0.12324	0.574788	-0.168513	-0.374622	0.0375956	-1.69344	0.104178	0.61312	-0.180344	-0.386452	0.0257653	-1.81233	0.0833081	0.328984	-0.269625	-0.492248	-0.047002	-2.50856	0.0198042	0.104527	0.00923103
P04080	CSTB	-0.726523	-1.58359	0.130547	-1.75577	0.0927405	0.323843	-0.603017	-1.36273	0.156695	-1.64405	0.114074	0.574788	-0.991737	-1.84881	-0.134667	-2.3967	0.0252692	0.429673	-0.686649	-1.54372	0.170422	-1.6594	0.110917	0.3718	-0.894683	-1.82042	0.0310593	-2.00176	0.0575162	0.18959	0.779825
P04083	ANXA1	0.608102	0.0707921	1.14541	2.34415	0.0282913	0.216596	0.367725	-0.108549	0.843999	1.59919	0.123734	0.574788	0.189278	-0.348032	0.726588	0.729641	0.473141	0.820044	-0.0151137	-0.552423	0.522196	-0.0582614	0.954055	0.976886	0.164033	-0.416328	0.744394	0.585419	0.564094	0.722365	0.0141233
P04114	APOB	0.0768035	-0.331004	0.484611	0.390085	0.700144	0.844009	0.388835	0.0273522	0.750318	2.22798	0.0361839	0.407184	0.0700376	-0.33777	0.477845	0.355721	0.725365	0.930987	0.412469	0.00466148	0.820277	2.09493	0.0476474	0.239584	0.859627	0.419144	1.30011	4.04217	0.000525129	0.012069	0.0850181
P04196	HRG	0.300917	-0.0390181	0.640852	1.83351	0.0799954	0.309548	0.144437	-0.156884	0.445757	0.992848	0.331347	0.77019	0.144441	-0.195494	0.484376	0.880091	0.388118	0.78209	0.0152354	-0.3247	0.355171	0.0928309	0.92686	0.974967	0.40733	0.0401577	0.774501	2.29779	0.0312296	0.125234	0.0833075
P04206	IGKV3-20	0.434277	-0.0428089	0.911362	1.8854	0.0723601	0.297806	0.293508	-0.129384	0.716399	1.43756	0.164329	0.596951	0.163348	-0.313738	0.640433	0.70917	0.485507	0.823734	-0.175857	-0.652943	0.301228	-0.763481	0.453112	0.698351	0.42247	-0.0928417	0.937781	1.69809	0.103287	0.27475	0.0741732
P04207	IGKV3-15	0.381188	0.0281955	0.734181	2.2367	0.0355283	0.230302	0.0699117	-0.242983	0.382806	0.462791	0.647961	0.909956	0.263593	-0.0894003	0.616585	1.54668	0.135897	0.62676	-0.252339	-0.605331	0.100654	-1.48065	0.152575	0.424349	0.324809	-0.056467	0.706085	1.7645	0.0912265	0.251757	0.00633963
P04208	IGLV1-47	0.108537	-0.1853	0.402374	0.765079	0.452179	0.692368	-0.0738897	-0.334348	0.186569	-0.587595	0.562658	0.8729	-0.0162017	-0.310039	0.277635	-0.114206	0.910088	0.974667	-0.447023	-0.74086	-0.153186	-3.15106	0.00455301	0.0648349	0.224318	-0.0930627	0.541698	1.46392	0.157054	0.348357	0.12402
P04209	IGLV2-14	0.694867	-0.219446	1.60918	1.57413	0.129421	0.368591	0.4274	-0.383052	1.23785	1.0923	0.286266	0.727933	0.451099	-0.463213	1.36541	1.02191	0.317692	0.734406	-0.0304932	-0.944806	0.883819	-0.0690783	0.945538	0.976886	0.269293	-0.718277	1.25686	0.564795	0.577804	0.731508	0.844167
P04211	IGLV7-43	0.151433	-0.65644	0.959306	0.38825	0.701482	0.844009	-0.0113038	-0.727407	0.704799	-0.0326951	0.974206	0.993462	-0.128984	-0.936857	0.678889	-0.330694	0.743937	0.93254	0.157551	-0.650322	0.965424	0.403935	0.690076	0.85301	0.120667	-0.751936	0.99327	0.286422	0.777177	0.876226	0.00277485
P04217	A1BG	0.516922	0.188879	0.844965	3.26383	0.0034837	0.137172	0.204047	-0.0867318	0.494826	1.45345	0.15991	0.592514	0.36663	0.0385869	0.694673	2.31489	0.0301145	0.451134	0.577154	0.249111	0.905197	3.64414	0.00139254	0.0381291	0.794339	0.440012	1.14867	4.64339	0.000119157	0.00633963	0.0063936
P04259	KRT6B	2.39289	0.459036	4.32675	2.56291	0.0175662	0.213054	1.24465	-0.46953	2.95883	1.50392	0.146517	0.581747	1.50776	-0.426101	3.44161	1.61488	0.12028	0.620476	1.66474	-0.269117	3.5986	1.78302	0.0880876	0.330043	-0.423899	-2.5127	1.66491	-0.420338	0.678228	0.808875	0.0418445
P04264	KRT1	1.83395	0.130468	3.53744	2.22989	0.0360393	0.230302	0.864267	-0.645711	2.37424	1.18553	0.248185	0.6957	1.0859	-0.617582	2.78939	1.32034	0.200001	0.68199	1.11396	-0.589529	2.81744	1.35445	0.189045	0.460959	-0.625958	-2.46593	1.21402	-0.70464	0.488268	0.659688	0.0542968
P04275	VWF	0.515227	0.0894456	0.941009	2.50637	0.0198995	0.213054	0.638307	0.260892	1.01572	3.50303	0.0019612	0.135526	0.605076	0.179294	1.03086	2.94345	0.00740451	0.337674	0.580085	0.154303	1.00587	2.82188	0.00979935	0.101118	0.48065	0.0207525	0.940547	2.16472	0.0412801	0.148441	0.556193
P04278	SHBG	0.105587	-0.680045	0.89122	0.278372	0.78327	0.897786	-0.787168	-1.48356	-0.0907796	-2.34126	0.0284667	0.407184	0.0496462	-0.735986	0.835279	0.130888	0.897028	0.974667	-0.503663	-1.2893	0.281969	-1.32787	0.197542	0.470402	0.265162	-0.583418	1.11374	0.647219	0.524042	0.693527	0.512036
P04350	TUBB4A	0.648591	-0.925791	2.22297	0.853286	0.402498	0.669469	1.51912	0.123578	2.91466	2.25467	0.0342108	0.407184	-0.578938	-2.15332	0.995443	-0.761651	0.454182	0.819986	-0.0208267	-1.59521	1.55356	-0.0273996	0.978383	0.986616	1.05225	-0.648277	2.75278	1.28165	0.213022	0.413275	0.370008
P04406	GAPDH	-0.0140144	-0.222761	0.194732	-0.139056	0.890644	0.957913	0.00335005	-0.181684	0.188384	0.0375003	0.970417	0.993462	-0.0798867	-0.288633	0.12886	-0.792665	0.436256	0.81526	-0.0302403	-0.238987	0.178506	-0.300056	0.766891	0.886406	-0.148326	-0.373797	0.0771461	-1.36257	0.186509	0.38269	0.0124207
P04430	IGKV1-16	0.0492277	-0.239168	0.337623	0.353553	0.726967	0.859801	0.143771	-0.111865	0.399406	1.16488	0.256273	0.704288	-0.0924035	-0.380799	0.195992	-0.663642	0.513666	0.838928	-0.110327	-0.398722	0.178069	-0.792365	0.436427	0.685951	0.210037	-0.101466	0.52154	1.39659	0.17617	0.370008	0.135505
P04433	IGKV3-11	0.0833818	-0.247491	0.414254	0.521969	0.606795	0.795651	-0.125371	-0.418658	0.167916	-0.885397	0.385311	0.79197	-0.0810108	-0.411883	0.249862	-0.507126	0.617003	0.894717	-0.318873	-0.649746	0.0119989	-1.99614	0.0581659	0.278783	0.0201508	-0.337232	0.377534	0.116786	0.908066	0.941111	0.0108831
P04632	CAPNS1	-0.222016	-0.500898	0.056866	-1.64891	0.113066	0.354026	-0.261878	-0.50908	-0.0146752	-2.19422	0.038828	0.407184	-0.259114	-0.537995	0.0197683	-1.92444	0.0670434	0.58932	-0.187301	-0.466183	0.0915809	-1.39108	0.17781	0.450433	-0.398308	-0.699535	-0.0970808	-2.73879	0.011842	0.0779839	0.570737
P04792	HSPB1	0.24803	-0.227248	0.723308	1.08091	0.291192	0.573563	-0.268016	-0.689305	0.153273	-1.31769	0.200872	0.659082	-0.0232827	-0.498561	0.451995	-0.101466	0.92008	0.976299	0.361593	-0.113685	0.836871	1.57582	0.129031	0.394293	0.0977429	-0.415616	0.611102	0.394364	0.697027	0.820303	0.012069
P04899;P04899-4	GNAI2	-0.0415589	-0.998464	0.915346	-0.0899557	0.929119	0.965741	-0.459187	-1.30739	0.389019	-1.1213	0.27399	0.715585	0.335142	-0.621763	1.29205	0.725427	0.475671	0.820044	-0.158882	-1.11579	0.798023	-0.343906	0.734111	0.871145	-0.0482114	-1.08179	0.985364	-0.0966144	0.923888	0.953081	0.214137
P04921;P04921-2;P04921-3	GYPC	-0.153063	-0.945308	0.639183	-0.400169	0.692808	0.841918	-0.0944859	-0.796736	0.607765	-0.278682	0.783035	0.954502	-0.307173	-1.09942	0.485072	-0.803076	0.430336	0.806315	-0.0216961	-0.813941	0.770549	-0.0567225	0.955267	0.976886	-0.282645	-1.13837	0.573078	-0.684136	0.500879	0.675428	0.104527
P05089;P05089-2	ARG1	0.173859	-0.186169	0.533887	1.00022	0.327845	0.596671	-0.00303419	-0.322165	0.316096	-0.0196928	0.984462	0.993462	-0.0939009	-0.453929	0.266127	-0.540216	0.594358	0.876155	0.0467722	-0.313256	0.4068	0.269082	0.790319	0.894606	-0.191463	-0.580337	0.197412	-1.01978	0.318676	0.499774	0.18959
P05090	APOD	0.0806455	-0.302435	0.463726	0.436037	0.666966	0.826844	-0.0231844	-0.362749	0.31638	-0.141419	0.888798	0.980785	0.77893	0.395849	1.16201	4.21155	0.000345899	0.0820935	1.55939	1.17631	1.94247	8.43135	2.05e-08	7.31e-06	0.510171	0.0963968	0.923946	2.55379	0.0179241	0.0981688	0.722365
P05106;P05106-2;P05106-3	ITGB3	-0.648189	-1.34087	0.0444955	-1.93821	0.0652515	0.287759	-0.364493	-0.978492	0.249507	-1.22957	0.231565	0.684266	-0.403887	-1.09657	0.288797	-1.2077	0.239711	0.688202	-1.08102	-1.7737	-0.388333	-3.23244	0.00375404	0.0593972	-0.681906	-1.43009	0.0662793	-1.88777	0.0720274	0.215477	0.012069
P05109	S100A8	0.388115	-0.523253	1.29948	0.882064	0.387073	0.651526	-0.596015	-1.40386	0.211827	-1.52814	0.14042	0.581747	-0.661746	-1.57311	0.249621	-1.50394	0.14651	0.634427	-1.68039	-2.59176	-0.769021	-3.819	0.00090853	0.0323437	-0.668338	-1.65273	0.316051	-1.40625	0.173316	0.370008	0.125234
P05154	SERPINA5	0.558895	-0.684444	1.80223	0.931053	0.361714	0.629682	0.367178	-0.734924	1.46928	0.690062	0.497215	0.838434	-0.269968	-1.51331	0.973371	-0.449735	0.657206	0.912933	0.306684	-0.936655	1.55002	0.510899	0.6144	0.811303	1.26049	-0.08247	2.60345	1.94406	0.0645023	0.203097	0.27475
P05155;P05155-2;P05155-3	SERPING1	0.655977	0.0948425	1.21711	2.42134	0.0239575	0.213054	0.376845	-0.120547	0.874237	1.56927	0.130549	0.574788	0.336732	-0.224402	0.897866	1.24295	0.226691	0.682215	0.947165	0.386031	1.5083	3.49617	0.001994	0.0405636	0.968771	0.362677	1.57487	3.31066	0.00311519	0.039983	0.251757
P05156	CFI	1.05535	0.518272	1.59243	4.06998	0.000490379	0.0555598	0.305033	-0.171037	0.781104	1.32712	0.197786	0.654994	0.588186	0.051106	1.12527	2.26835	0.0332383	0.477713	0.47211	-0.0649705	1.00919	1.8207	0.0819861	0.328984	0.906634	0.326521	1.48675	3.23708	0.0037129	0.0410624	0.348357
P05164;P05164-2;P05164-3	MPO	0.494177	-0.550218	1.53857	0.980057	0.337484	0.603741	-0.0976209	-1.02338	0.828136	-0.218413	0.829077	0.954502	-0.465768	-1.51016	0.578627	-0.923716	0.365439	0.772452	-1.12302	-2.16742	-0.0786287	-2.22719	0.0362436	0.211187	-0.615098	-1.74317	0.512978	-1.12938	0.270641	0.45946	0.731508
P05198	EIF2S1	-0.479227	-0.993203	0.0347488	-1.93122	0.0661549	0.287759	0.00936759	-0.446223	0.464959	0.0425879	0.966406	0.993462	-0.142213	-0.656189	0.371763	-0.573098	0.572264	0.872253	-0.318596	-0.832572	0.19538	-1.2839	0.212247	0.489229	-0.626175	-1.18133	-0.0710175	-2.33622	0.0287753	0.123335	0.876226
P05388;P05388-2	RPLP0	0.647462	-0.179263	1.47419	1.62214	0.118711	0.360009	-0.0112646	-0.744078	0.721549	-0.0318388	0.974881	0.993462	0.286755	-0.53997	1.11348	0.718429	0.479891	0.822261	-0.711694	-1.53842	0.11503	-1.78306	0.0880803	0.330043	0.110868	-0.782097	1.00383	0.257161	0.799393	0.88243	0.00633963
P05452	CLEC3B	0.47715	0.0229213	0.931379	2.17578	0.0403451	0.237818	0.222321	-0.18031	0.624952	1.14369	0.264782	0.712099	0.178894	-0.275335	0.633123	0.815747	0.423201	0.803518	0.112112	-0.342117	0.566341	0.511223	0.614178	0.811303	0.5216	0.0309767	1.01222	2.20203	0.038201	0.143262	0.808875
P05543	SERPINA7	0.265984	-0.203905	0.735873	1.17245	0.253287	0.536727	0.176561	-0.23995	0.593073	0.878015	0.389219	0.79197	0.052475	-0.417414	0.522364	0.231308	0.819167	0.958465	0.210541	-0.259348	0.68043	0.928058	0.363231	0.641739	0.554914	0.0473763	1.06245	2.2646	0.0335023	0.131064	0.659688
P05546	SERPIND1	0.578992	0.178666	0.979319	2.99566	0.00655789	0.141491	0.30347	-0.051381	0.658322	1.77135	0.0900552	0.55439	0.210804	-0.189522	0.611131	1.09068	0.28696	0.715548	0.520924	0.120598	0.921251	2.69522	0.0130683	0.120839	0.838499	0.406097	1.2709	4.01651	0.000559376	0.012069	0.148441
P05976;P05976-2	MYL1	0.0684392	-0.479551	0.616429	0.258682	0.798234	0.907366	-0.0685018	-0.554243	0.417239	-0.292099	0.772888	0.954502	0.356449	-0.191541	0.904439	1.34728	0.191308	0.669511	-0.120804	-0.668794	0.427186	-0.456606	0.652334	0.831205	-0.479212	-1.07111	0.112685	-1.67693	0.107402	0.279495	0.693527
P06132	UROD	-0.148491	-0.397616	0.100634	-1.23457	0.229735	0.514375	0.0451354	-0.17569	0.265961	0.423352	0.67606	0.92198	-0.242939	-0.492064	0.00618581	-2.01983	0.0554717	0.568163	-0.240057	-0.489182	0.00906852	-1.99586	0.0581989	0.278783	-0.0844672	-0.353553	0.184619	-0.650176	0.522165	0.692331	0.413275
P06310	IGKV2-30	0.00133285	-0.453679	0.456345	0.00606723	0.995213	0.998016	0.0504935	-0.352832	0.453819	0.259307	0.797757	0.954502	-0.0821991	-0.537211	0.372813	-0.374178	0.711777	0.930987	-0.214527	-0.669539	0.240485	-0.976548	0.339181	0.625322	0.227803	-0.263666	0.719273	0.960058	0.347235	0.530539	0.38269
P06312;P06313	IGKV4-1	0.448489	0.00463071	0.892347	2.09286	0.0478487	0.262064	0.225723	-0.167715	0.619161	1.18832	0.247105	0.695411	0.0953336	-0.348524	0.539192	0.444873	0.660664	0.913283	-0.233986	-0.677844	0.209873	-1.09189	0.286441	0.576119	0.309781	-0.16964	0.789203	1.33836	0.194155	0.387222	0.370008
P06331	IGHV4-34	0.0828173	-0.623159	0.788794	0.242977	0.810226	0.908777	-0.0712316	-0.697013	0.55455	-0.235767	0.815747	0.954502	0.0245821	-0.681395	0.730559	0.072121	0.943143	0.986076	-0.0296602	-0.735637	0.676317	-0.0870197	0.931426	0.974967	0.313494	-0.449048	1.07604	0.851528	0.403452	0.583858	0.941111
P06396	GSN	0.252048	-0.0765031	0.580599	1.58896	0.126029	0.363418	0.0139961	-0.277233	0.305226	0.0995418	0.92159	0.986362	-0.0602287	-0.38878	0.268322	-0.379694	0.707734	0.930987	-0.341821	-0.670372	-0.0132694	-2.15491	0.0421261	0.22482	0.19495	-0.159925	0.549826	1.13784	0.267164	0.458363	0.0779839
P06681	C2	0.548846	0.0397394	1.05795	2.23293	0.0358102	0.230302	0.236936	-0.214338	0.688211	1.08749	0.288339	0.730425	0.284349	-0.224758	0.793456	1.15685	0.259474	0.694612	0.533546	0.0244398	1.04265	2.17069	0.040773	0.221819	0.690428	0.14053	1.24033	2.60058	0.0161561	0.0917859	0.820303
P06702	S100A9	0.233309	-0.696332	1.16295	0.519817	0.60827	0.796119	-0.363538	-1.18758	0.4605	-0.913769	0.370531	0.784928	-0.719358	-1.649	0.210283	-1.60274	0.122945	0.620476	-1.35739	-2.28703	-0.427749	-3.02429	0.00613389	0.0750358	-0.659725	-1.66385	0.344402	-1.36084	0.187045	0.38269	0.953081
P06703	S100A6	-0.272265	-0.557248	0.0127172	-1.97883	0.0602086	0.287708	-0.294915	-0.547525	-0.0423049	-2.41813	0.0241246	0.381704	-0.297868	-0.58285	-0.0128854	-2.16491	0.0412641	0.51616	-0.201861	-0.486844	0.0831212	-1.46713	0.156186	0.42952	-0.408145	-0.715962	-0.100329	-2.74636	0.0116405	0.077458	0.675428
P06727	APOA4	-0.728411	-1.20709	-0.249729	-3.15183	0.00454473	0.137172	-0.674946	-1.09925	-0.25064	-3.29476	0.00323587	0.135526	-0.0958111	-0.574493	0.38287	-0.414575	0.682381	0.930757	0.282757	-0.195925	0.761438	1.22349	0.23381	0.510652	-0.105637	-0.622672	0.411398	-0.423185	0.67618	0.807785	0.499774
P06733	ENO1	-0.0554719	-0.258927	0.147984	-0.564725	0.57785	0.776282	-0.121852	-0.302196	0.0584919	-1.39947	0.175313	0.621341	-0.0927665	-0.296222	0.110689	-0.944398	0.355002	0.76363	-0.134405	-0.337861	0.0690502	-1.3683	0.184734	0.458295	-0.272325	-0.492082	-0.052568	-2.56672	0.0174184	0.0962744	0.0981688
P06744	GPI	-0.137823	-0.453783	0.178136	-0.903494	0.37584	0.642881	-0.21814	-0.498208	0.0619278	-1.61327	0.120632	0.574788	-0.207304	-0.523263	0.108656	-1.35897	0.18763	0.667963	-0.360137	-0.676096	-0.0441778	-2.36086	0.0272959	0.185092	-0.37524	-0.716515	-0.0339653	-2.2774	0.0326086	0.128985	0.215477
P06744;P06744-2	GPI	-0.312624	-1.12232	0.497076	-0.799709	0.432245	0.688254	-0.314241	-1.03196	0.403482	-0.906859	0.374096	0.784928	-0.182354	-0.992054	0.627346	-0.466471	0.645365	0.911688	-0.504159	-1.31386	0.305541	-1.28967	0.210272	0.488896	0.190406	-0.684171	1.06498	0.450937	0.656353	0.794767	0.370008
P06753-2	TPM3	-0.233628	-0.47253	0.00527432	-2.02553	0.0548398	0.280001	-0.191547	-0.403311	0.020217	-1.87351	0.0740509	0.522022	-0.169432	-0.408334	0.0694697	-1.46896	0.155693	0.634427	-0.248305	-0.487207	-0.00940329	-2.15278	0.0423117	0.22482	-0.290488	-0.548532	-0.0324445	-2.33168	0.0290556	0.123335	0.203097
P07195	LDHB	-0.143995	-0.360342	0.0723529	-1.37857	0.181588	0.452064	-0.140326	-0.332098	0.0514455	-1.51561	0.143547	0.581747	-0.188852	-0.405199	0.0274959	-1.80802	0.0839971	0.599783	-0.179127	-0.395475	0.0372204	-1.71492	0.100109	0.351577	-0.253369	-0.487052	-0.0196872	-2.24575	0.0348587	0.134159	0.039983
P07203	GPX1	-0.109862	-0.343262	0.123539	-0.97494	0.33996	0.60513	-0.0867591	-0.293647	0.120128	-0.86859	0.394246	0.79197	-0.163354	-0.396755	0.0700464	-1.44965	0.16096	0.635041	-0.0897896	-0.32319	0.143611	-0.796816	0.43389	0.685951	-0.197749	-0.44985	0.0543527	-1.6247	0.118161	0.290029	0.0410624
P07225	PROS1	0.381182	0.0443907	0.717973	2.34426	0.0282848	0.216596	0.0672942	-0.231239	0.365828	0.466894	0.645067	0.909956	0.0903927	-0.246398	0.427184	0.555913	0.583759	0.874596	0.11968	-0.217112	0.456471	0.736026	0.469323	0.710186	0.556054	0.192278	0.91983	3.16604	0.00439457	0.0433049	0.45946
P07311	ACYP1	0.126022	-0.210387	0.46243	0.775912	0.445884	0.688254	0.0834139	-0.21478	0.381608	0.579393	0.568083	0.875747	0.0889478	-0.24746	0.425356	0.547649	0.589327	0.874596	0.132432	-0.203977	0.46884	0.815377	0.423408	0.685951	0.0713305	-0.292032	0.434693	0.406602	0.688144	0.81119	0.123335
P07357	C8A	0.532898	0.0788785	0.986918	2.4311	0.0234553	0.213054	-0.00527828	-0.407724	0.397167	-0.0271656	0.978567	0.993462	0.390497	-0.0635224	0.844517	1.78146	0.0883473	0.599783	0.279432	-0.174588	0.733452	1.27478	0.215401	0.489229	0.560342	0.0699448	1.05074	2.36668	0.0269572	0.120714	0.88243
P07358	C8B	0.47418	0.0666836	0.881676	2.4102	0.0245425	0.213054	0.27377	-0.0874367	0.634977	1.56987	0.130409	0.574788	0.509593	0.102096	0.917089	2.5902	0.0165337	0.401974	0.340117	-0.067379	0.747614	1.72878	0.097555	0.350804	0.545298	0.105152	0.985445	2.56608	0.017443	0.0962744	0.143262
P07359	GP1BA	0.0790051	-0.497695	0.655706	0.283752	0.779197	0.894819	-0.145194	-0.656384	0.365997	-0.5883	0.562193	0.8729	-0.291285	-0.867986	0.285415	-1.04617	0.306597	0.725239	-0.196953	-0.773654	0.379747	-0.70737	0.486603	0.717791	-0.138769	-0.761677	0.484138	-0.461428	0.648924	0.790726	0.131064
P07360	C8G	0.890321	0.279654	1.50099	3.01979	0.00619878	0.141491	0.442272	-0.0990256	0.98357	1.69234	0.104392	0.569926	0.573208	-0.0374588	1.18387	1.9442	0.0644843	0.581175	0.863987	0.253321	1.47465	2.93047	0.00763074	0.0862395	0.903509	0.243914	1.5631	2.83719	0.00946137	0.0691482	0.012069
P07384	CAPN1	-0.0417256	-0.2116	0.128149	-0.508754	0.615879	0.797839	0.0591572	-0.0914206	0.209735	0.81373	0.424332	0.804084	0.151522	-0.0183528	0.321396	1.84748	0.0778741	0.599783	0.107344	-0.0625311	0.277218	1.30882	0.203811	0.479456	-0.131991	-0.315476	0.0514948	-1.48996	0.150126	0.337309	0.279495
P07437	TUBB	0.257847	-0.0228952	0.538589	1.90234	0.0700094	0.296706	0.178905	-0.0699462	0.427756	1.48907	0.150358	0.586223	-0.0613275	-0.342069	0.219414	-0.452461	0.655271	0.912933	-0.0101141	-0.290856	0.270628	-0.0746198	0.941177	0.976886	0.13953	-0.163706	0.442766	0.953063	0.35069	0.533529	0.692331
P07451	CA3	-0.0773486	-0.324974	0.170277	-0.646979	0.524194	0.74653	-0.14296	-0.362457	0.0765364	-1.34903	0.190754	0.644586	-0.0734455	-0.321071	0.17418	-0.614332	0.545161	0.857771	0.0268678	-0.220758	0.274494	0.224734	0.824215	0.911244	-0.150894	-0.418361	0.116572	-1.16852	0.254834	0.446901	0.530539
P07477;P07478;Q8NHM4	PRSS1;PRSS2	-0.43096	-1.93548	1.07356	-0.5933	0.558901	0.762332	-0.467252	-1.80086	0.866358	-0.725698	0.475508	0.829808	-0.260479	-1.76499	1.24404	-0.358599	0.723239	0.930987	-1.18405	-2.68856	0.320465	-1.63007	0.117013	0.379744	-0.191564	-1.81663	1.4335	-0.244162	0.809319	0.887881	0.387222
P07737	PFN1	0.119769	-0.198431	0.43797	0.77961	0.443748	0.688254	-0.0955301	-0.377585	0.186524	-0.701521	0.490174	0.837687	-0.0380876	-0.356288	0.280113	-0.247923	0.806444	0.954777	-0.179003	-0.497203	0.139198	-1.16518	0.256157	0.541878	-0.192132	-0.535828	0.151564	-1.15787	0.259067	0.448797	0.583858
P07738	BPGM	-0.175287	-0.431449	0.0808757	-1.41732	0.170095	0.429461	-0.160881	-0.387945	0.0661827	-1.46754	0.156075	0.587965	-0.203891	-0.460054	0.0522712	-1.64861	0.113129	0.61312	-0.189025	-0.445188	0.0671371	-1.5284	0.140356	0.406095	-0.321651	-0.598338	-0.0449638	-2.40785	0.0246675	0.11771	0.458363
P07741	APRT	-0.158677	-0.410432	0.0930776	-1.30548	0.204927	0.479426	-0.125257	-0.348414	0.0978994	-1.16259	0.257184	0.704288	-0.0565277	-0.308283	0.195227	-0.465069	0.646354	0.911688	-0.0264962	-0.278251	0.225259	-0.217991	0.829402	0.91414	-0.0824386	-0.354365	0.189488	-0.627932	0.536373	0.704608	0.0917859
P07900;P07900-2	HSP90AA1	-0.262048	-0.48838	-0.0357165	-2.39811	0.0251923	0.213054	0.0455854	-0.155036	0.246207	0.470632	0.642436	0.909956	-0.0674392	-0.293771	0.158892	-0.617164	0.543325	0.857771	-0.0994911	-0.325823	0.12684	-0.910485	0.372222	0.65116	-0.149449	-0.393915	0.0950168	-1.26622	0.218394	0.419127	0.38269
P07954-2	FH	0.175275	-0.423686	0.774236	0.606115	0.550508	0.760763	-0.441559	-0.972482	0.0893628	-1.72263	0.0986807	0.567703	-0.0294922	-0.628453	0.569469	-0.101986	0.919671	0.976299	0.0155182	-0.583443	0.614479	0.0536631	0.957677	0.976886	-0.133556	-0.780508	0.513396	-0.427588	0.673017	0.806715	0.077458
P07996	THBS1	-0.4398	-0.969429	0.0898294	-1.71995	0.0991742	0.327953	-0.14559	-0.615056	0.323877	-0.642332	0.527152	0.839375	0.275459	-0.254171	0.805088	1.07725	0.292787	0.717018	-0.0119509	-0.54158	0.517678	-0.0467373	0.963135	0.981048	-0.160344	-0.732409	0.411721	-0.580552	0.567314	0.723885	0.807785
P08107	HSPA1A;HSPA1B	-0.136264	-0.371453	0.0989251	-1.20005	0.242611	0.526412	-0.183442	-0.391915	0.0250311	-1.82256	0.0816936	0.534953	-0.202213	-0.437402	0.0329759	-1.78084	0.0884511	0.599783	-0.386252	-0.621441	-0.151063	-3.40163	0.00250459	0.0445817	-0.298387	-0.55242	-0.0443536	-2.43289	0.0233644	0.114253	0.0962744
P08185	SERPINA6	0.491889	0.166309	0.817469	3.12927	0.00479349	0.137172	0.236282	-0.0523137	0.524878	1.6958	0.103725	0.569926	0.461019	0.135439	0.786599	2.93288	0.00758817	0.337674	0.584756	0.259176	0.910336	3.72006	0.00115723	0.0343311	1.06591	0.714244	1.41758	6.27802	2.32e-06	0.000414064	0.128985
P08237	PFKM	0.0847771	-0.462187	0.631741	0.321036	0.751147	0.878101	-0.150623	-0.635455	0.334209	-0.643477	0.526422	0.839375	0.0691022	-0.477862	0.616066	0.261678	0.795951	0.949275	-0.151101	-0.698065	0.395863	-0.572192	0.572868	0.785817	-0.169067	-0.759855	0.421722	-0.592734	0.559273	0.720818	0.794767
P08238	HSP90AB1	0.436989	-0.0849715	0.95895	1.73407	0.0965943	0.327953	0.738648	0.275979	1.20132	3.30675	0.0031445	0.135526	0.3515	-0.170461	0.873461	1.39483	0.176692	0.662129	0.46836	-0.0536007	0.990321	1.85856	0.0762272	0.313721	0.0436296	-0.520153	0.607412	0.160289	0.874085	0.924737	0.123335
P08397	HMBS	0.00763065	-0.226239	0.2415	0.0675805	0.946717	0.977046	0.186205	-0.0210985	0.393508	1.86045	0.0759484	0.525003	0.0538352	-0.180034	0.287705	0.476789	0.638113	0.910493	0.240628	0.00675807	0.474497	2.13111	0.0442441	0.231631	0.171399	-0.0812087	0.424007	1.40539	0.173571	0.370008	0.134159
P08514	ITGA2B	0.012806	-0.321236	0.346848	0.0794045	0.937413	0.972942	-0.110564	-0.406661	0.185533	-0.773416	0.44733	0.825172	0.0692087	-0.264834	0.403251	0.429134	0.671908	0.925336	-0.12209	-0.456132	0.211952	-0.757029	0.456891	0.699584	-0.156096	-0.516903	0.204711	-0.896087	0.379698	0.560882	0.290029
P08519	LPA	0.00445822	-0.437068	0.445984	0.0209141	0.983499	0.993264	0.033267	-0.358104	0.424638	0.176059	0.861823	0.966211	0.0336783	-0.407848	0.475204	0.157989	0.875875	0.974667	0.191866	-0.249661	0.633392	0.900066	0.377622	0.65562	0.225422	-0.251481	0.702324	0.979038	0.337976	0.519739	0.0433049
P08567	PLEK	0.507019	-0.352884	1.36692	1.22126	0.234636	0.520438	-0.247312	-1.00953	0.514911	-0.672042	0.508403	0.838434	0.151881	-0.708022	1.01178	0.365837	0.717905	0.930987	-0.179585	-1.03949	0.680318	-0.432567	0.669449	0.838504	0.186455	-0.742346	1.11526	0.415801	0.681496	0.810316	0.81119
P08603	CFH	0.366841	-0.0180318	0.751715	1.97421	0.0607633	0.287759	0.0648493	-0.276304	0.406003	0.393721	0.697495	0.938253	0.0497456	-0.335128	0.434619	0.267714	0.791359	0.948565	-0.131881	-0.516754	0.252993	-0.709736	0.485162	0.717791	0.61023	0.194519	1.02594	3.04044	0.00590648	0.0509784	0.120714
P08670	VIM	-0.0325883	-0.644057	0.578881	-0.110388	0.913081	0.962325	-0.229505	-0.771514	0.312504	-0.877039	0.389738	0.79197	-0.276838	-0.888308	0.334631	-0.937747	0.358337	0.768372	-0.419079	-1.03055	0.19239	-1.41956	0.169448	0.446839	-0.414094	-1.07456	0.246369	-1.29863	0.20723	0.406469	0.0962744
P08697	SERPINF2	0.244769	-0.118119	0.607658	1.39707	0.176026	0.441305	0.144476	-0.17719	0.466142	0.930304	0.362093	0.781243	0.431269	0.0683803	0.794157	2.46155	0.0219513	0.429673	0.395049	0.0321607	0.757937	2.25482	0.0342001	0.209918	0.605183	0.213219	0.997147	3.19797	0.0040744	0.0420431	0.790726
P08758	ANXA5	0.445725	-0.373039	1.26449	1.12757	0.271389	0.556857	-0.124051	-0.849808	0.601706	-0.354032	0.726613	0.951668	0.354937	-0.463827	1.1737	0.897896	0.378753	0.776685	-0.139159	-0.957923	0.679605	-0.352036	0.728089	0.871145	-0.495679	-1.38005	0.388687	-1.16092	0.257849	0.448225	0.0691482
P09104	ENO2	-0.0907277	-0.385847	0.204392	-0.636759	0.53071	0.750526	0.0212062	-0.240389	0.282802	0.167906	0.868158	0.970374	0.0243406	-0.270779	0.31946	0.170831	0.865884	0.973949	0.05924	-0.23588	0.35436	0.415767	0.681521	0.845728	-0.207851	-0.526617	0.110914	-1.35056	0.19027	0.385247	0.337309
P09105	HBQ1	0.202252	-0.0547907	0.459295	1.62975	0.117082	0.358202	0.138372	-0.0894725	0.366216	1.25789	0.221335	0.684266	0.0874585	-0.169584	0.344501	0.704743	0.488205	0.823734	0.0697006	-0.187342	0.326743	0.561649	0.57991	0.787969	-0.186059	-0.463697	0.0915792	-1.38805	0.17872	0.373115	0.533529
P09211	GSTP1	-0.148245	-0.548506	0.252015	-0.767135	0.45098	0.692021	0.219364	-0.135429	0.574157	1.28063	0.213374	0.680814	0.12081	-0.27945	0.521071	0.625166	0.538154	0.857771	0.252792	-0.147468	0.653053	1.30814	0.204038	0.479456	0.114121	-0.31821	0.546452	0.546743	0.589939	0.740805	0.446901
P09417	QDPR	0.0890028	-0.105143	0.283148	0.949533	0.352443	0.619603	-0.0201828	-0.192275	0.151909	-0.242915	0.810273	0.954502	-0.146328	-0.340473	0.047818	-1.56111	0.132461	0.620476	-0.127855	-0.322001	0.0662905	-1.36403	0.186054	0.458376	-0.209389	-0.41909	0.000312346	-2.06817	0.0503141	0.172629	0.887881
P09493	TPM1	-0.287845	-0.619705	0.0440152	-1.79654	0.0858541	0.322015	-0.355627	-0.649789	-0.0614646	-2.50404	0.0200017	0.349174	-0.269331	-0.601191	0.0625288	-1.68099	0.106602	0.61312	-0.283128	-0.614988	0.0487321	-1.7671	0.0907802	0.334899	-0.413305	-0.771755	-0.0548556	-2.38823	0.0257352	0.119226	0.887881
P09493-2	TPM1	-0.127571	-0.363369	0.108227	-1.12059	0.274286	0.560164	-0.121468	-0.33048	0.0875447	-1.20371	0.241218	0.692769	-0.174249	-0.410046	0.0615492	-1.53061	0.139813	0.62676	-0.0505774	-0.286375	0.18522	-0.444273	0.661091	0.834706	-0.357365	-0.612056	-0.102674	-2.90625	0.00807058	0.0611304	0.448797
P09493-5	TPM1	-0.285901	-0.549403	-0.0224	-2.24733	0.0347434	0.230302	-0.386114	-0.619683	-0.152545	-3.424	0.00237331	0.135526	-0.458897	-0.722398	-0.195396	-3.60717	0.00152358	0.216957	-0.237683	-0.501184	0.0258186	-1.86831	0.0748021	0.311457	-0.553926	-0.83854	-0.269312	-4.03115	0.000539572	0.012069	0.11771
P09525	ANXA4	-0.489912	-1.0716	0.0917757	-1.74446	0.0947315	0.32584	-0.407331	-0.922942	0.10828	-1.63629	0.115699	0.574788	-0.470284	-1.05197	0.111403	-1.67457	0.107869	0.61312	-0.421118	-1.00281	0.160569	-1.4995	0.14765	0.415522	-0.543926	-1.17222	0.0843679	-1.79313	0.0864135	0.246135	0.704608
P09651;P09651-2;P09651-3	HNRNPA1	0.116248	-0.912972	1.14547	0.233944	0.817145	0.913085	-0.41851	-1.33082	0.493797	-0.950164	0.352129	0.776892	0.649256	-0.379965	1.67848	1.30659	0.204555	0.682215	-0.687853	-1.71707	0.341368	-1.38427	0.179859	0.450433	-0.0673374	-1.17902	1.04435	-0.125461	0.901273	0.936798	0.419127
P09871	C1S	0.513178	0.17085	0.855505	3.10499	0.0050758	0.137172	0.142316	-0.161125	0.445757	0.971433	0.341665	0.77019	0.521317	0.17899	0.863645	3.15423	0.00451901	0.306139	0.39578	0.0534527	0.738108	2.39467	0.0253801	0.175774	0.756541	0.386785	1.1263	4.2379	0.000324123	0.00923103	0.806715
P09960	LTA4H	-0.0936838	-0.316858	0.12949	-0.869471	0.393775	0.659688	-0.113552	-0.311374	0.0842709	-1.18892	0.246875	0.695411	-0.196194	-0.419368	0.0269793	-1.82086	0.0819599	0.599783	-0.151741	-0.374915	0.0714327	-1.4083	0.172718	0.449237	-0.244894	-0.485949	-0.00383837	-2.10424	0.0467503	0.163971	0.723885
P09972	ALDOC	0.0440382	-0.808438	0.896514	0.106999	0.915738	0.962325	-0.381395	-1.13703	0.374244	-1.04543	0.306932	0.743317	-0.820091	-1.67257	0.0323845	-1.99257	0.0585822	0.568163	-0.455483	-1.30796	0.396993	-1.10668	0.280128	0.569861	-0.00548994	-0.926269	0.915289	-0.0123494	0.990256	0.994616	0.114253
P0C0L4	C4A	0.633346	0.184793	1.0819	2.92456	0.00773584	0.161998	0.157917	-0.239683	0.555517	0.822653	0.419343	0.804084	0.302935	-0.145619	0.751488	1.39884	0.1755	0.662129	0.596269	0.147716	1.04482	2.75335	0.0114571	0.113298	0.657879	0.173386	1.14237	2.8125	0.010012	0.0720055	0.114253
P0C0L4;P0C0L5	C4A;C4B;C4B_2	-0.299699	-1.3344	0.734999	-0.599937	0.554545	0.760763	-0.400069	-1.31723	0.517093	-0.903489	0.375842	0.784928	-1.05839	-2.09309	-0.0236953	-2.11869	0.045387	0.53385	-0.337233	-1.37193	0.697465	-0.675072	0.506511	0.734493	0.117217	-1.00039	1.23482	0.217238	0.829981	0.899125	0.000414064
P0C0L5	C4B;C4B_2	0.482062	0.0727147	0.89141	2.43918	0.023047	0.213054	0.113877	-0.248971	0.476725	0.650049	0.522246	0.838434	0.447433	0.0380851	0.85678	2.26396	0.0335472	0.477713	0.4033	-0.00604759	0.812648	2.04066	0.0531944	0.263017	0.509775	0.0676293	0.951921	2.38807	0.0257442	0.119226	0.720818
P0C0S8;P20671;Q96KK5;Q99878;Q9BTM1	H2AFJ;HIST1H2AD;HIST1H2AG;HIST1H2AH;HIST1H2AI;HIST1H2AJ;HIST1H2AK;HIST1H2AL;HIST1H2AM	0.143125	-0.456719	0.742969	0.494209	0.625951	0.801578	0.0281329	-0.503572	0.559838	0.109592	0.913705	0.986362	-0.347075	-0.946919	0.252769	-1.19845	0.24322	0.68884	-0.170762	-0.770605	0.429082	-0.589638	0.561311	0.779051	0.0116769	-0.636228	0.659582	0.0373293	0.970552	0.981581	0.924737
P0CG05	IGLC2;IGLC3	0.260589	-0.0216169	0.542794	1.9126	0.0686184	0.292553	0.0655875	-0.184561	0.315736	0.543072	0.592423	0.893236	0.00774042	-0.274465	0.289946	0.0568111	0.955197	0.989618	-0.175504	-0.457709	0.106702	-1.28811	0.210802	0.488896	0.0536319	-0.251185	0.358449	0.364433	0.718939	0.833688	0.370008
P0CG06	IGLC2;IGLC3	0.750957	0.0568445	1.44507	2.24088	0.0352176	0.230302	0.311623	-0.303642	0.926888	1.04906	0.305293	0.741873	-0.0592502	-0.753363	0.634862	-0.176805	0.861244	0.9718	0.418094	-0.276019	1.11221	1.24761	0.22501	0.499088	0.702173	-0.0475544	1.4519	1.93988	0.0650368	0.203097	0.560882
P0CG47;P0CG48;P62979;P62987	RPS27A;UBA52;UBB;UBC	0.479314	0.106832	0.851797	2.66531	0.0139782	0.203111	0.529406	0.199236	0.859576	3.32112	0.00303823	0.135526	0.233321	-0.139161	0.605803	1.29742	0.207637	0.682215	0.273311	-0.0991708	0.645794	1.5198	0.142497	0.406095	0.243203	-0.159124	0.64553	1.25206	0.223414	0.421631	0.519739
P10599	TXN	0.157092	-0.128339	0.442522	1.13995	0.266303	0.552009	0.237154	-0.0158534	0.490161	1.94147	0.0648328	0.503259	0.0294861	-0.255945	0.314917	0.213969	0.832499	0.963804	-0.037535	-0.322966	0.247896	-0.272376	0.787818	0.893611	0.184884	-0.123416	0.493185	1.24211	0.226994	0.422939	0.810316
P10643	C7	0.559794	-0.035809	1.1554	1.94673	0.0641638	0.287759	-0.00752959	-0.535475	0.520416	-0.0295404	0.976694	0.993462	0.211668	-0.383934	0.807271	0.736094	0.469282	0.820044	0.277064	-0.318539	0.872666	0.963511	0.345538	0.625322	0.174658	-0.468666	0.817982	0.562331	0.579453	0.731508	0.0509784
P10746	UROS	0.162381	-0.466698	0.791461	0.534644	0.598142	0.788662	-0.0929495	-0.650569	0.46467	-0.345257	0.733109	0.951668	0.260596	-0.368483	0.889676	0.858018	0.399934	0.786611	0.239324	-0.389755	0.868404	0.78798	0.438935	0.688374	0.122827	-0.556657	0.80231	0.37441	0.711606	0.829493	0.406469
P10768	ESD	-0.181907	-0.399321	0.0355067	-1.73299	0.0967895	0.327953	-0.147291	-0.340008	0.0454264	-1.58303	0.127377	0.574788	-0.124941	-0.342355	0.0924728	-1.19029	0.246346	0.688953	-0.138682	-0.356096	0.0787319	-1.32119	0.199722	0.474006	-0.156826	-0.39166	0.0780085	-1.38321	0.180178	0.374014	0.0420431
P10909;P10909-2;P10909-4;P10909-5	CLU	0.493122	0.239436	0.746808	4.02617	0.000546234	0.0555598	0.345512	0.120643	0.57038	3.18249	0.00422664	0.158388	0.283884	0.030198	0.53757	2.31781	0.0299279	0.451134	0.439129	0.185443	0.692815	3.58534	0.00160656	0.0381291	0.607243	0.333231	0.881255	4.59015	0.000135874	0.0063936	0.448225
P11021	HSPA5	-0.213124	-0.980904	0.554656	-0.574949	0.571033	0.771491	-0.440814	-1.12138	0.239751	-1.34159	0.19312	0.645546	-0.457865	-1.22564	0.309915	-1.23519	0.229508	0.682215	-0.37134	-1.13912	0.39644	-1.00177	0.327111	0.612902	-0.686968	-1.51627	0.142329	-1.71577	0.0999492	0.270585	0.385247
P11142	HSPA8	-0.104809	-0.314554	0.104936	-1.035	0.311672	0.585206	-0.00876713	-0.194686	0.177152	-0.0976713	0.923059	0.986362	-0.0553787	-0.265124	0.154366	-0.546871	0.589853	0.874596	-0.0339695	-0.243715	0.175775	-0.335453	0.740392	0.874228	-0.121606	-0.348156	0.104945	-1.11179	0.277973	0.462422	0.373115
P11166	SLC2A1	-0.0654447	-0.399469	0.26858	-0.405817	0.688712	0.839663	0.0800434	-0.216038	0.376125	0.559949	0.581049	0.882105	0.0424308	-0.291594	0.376456	0.26311	0.794862	0.949275	0.00430557	-0.329719	0.33833	0.0266985	0.978936	0.986616	-0.205561	-0.566349	0.155227	-1.18011	0.250289	0.441478	0.740805
P11171	EPB41	-0.825417	-1.43353	-0.217306	-2.81141	0.0100369	0.163153	-0.658219	-1.19725	-0.119186	-2.52923	0.0189232	0.349174	-0.280036	-0.888148	0.328075	-0.953816	0.350317	0.758421	-0.251203	-0.859314	0.356909	-0.855609	0.401238	0.67537	-0.486538	-1.14337	0.170297	-1.53424	0.138919	0.327517	0.172629
P11171-2	EPB41	-0.266184	-0.487702	-0.0446654	-2.48889	0.0206776	0.213054	-0.144554	-0.340909	0.0518011	-1.52483	0.141242	0.581747	-0.114199	-0.335717	0.107319	-1.06779	0.296943	0.717018	-0.136568	-0.358087	0.08495	-1.27695	0.214647	0.489229	-0.288123	-0.52739	-0.0488558	-2.49418	0.020439	0.106223	0.119226
P11277	SPTB	-0.261182	-0.448739	-0.0736258	-2.88433	0.00848932	0.163153	-0.127656	-0.293907	0.0385954	-1.59041	0.125702	0.574788	-0.150577	-0.338133	0.0369799	-1.66287	0.110213	0.61312	-0.167494	-0.35505	0.0200626	-1.8497	0.0775423	0.314365	-0.307213	-0.509797	-0.104629	-3.141	0.00466255	0.0433049	0.0611304
P11413	G6PD	-0.192358	-0.453187	0.0684701	-1.52753	0.140572	0.384017	-0.122844	-0.354044	0.108355	-1.10053	0.282742	0.724146	-0.200196	-0.461025	0.0606322	-1.58977	0.125846	0.620476	-0.292545	-0.553373	-0.0317163	-2.32312	0.0295914	0.195084	-0.449868	-0.731595	-0.168141	-3.30743	0.00313938	0.039983	0.012069
P11413;P11413-2	G6PD	-0.0350562	-0.504164	0.434051	-0.154784	0.878372	0.951567	-0.00425242	-0.420072	0.411567	-0.0211819	0.983287	0.993462	-0.0831403	-0.552248	0.385967	-0.367091	0.716983	0.930987	0.0539058	-0.415201	0.523013	0.238011	0.814028	0.902784	-1.11545	-1.62215	-0.60876	-4.55974	0.000146459	0.0063936	0.246135
P11586	MTHFD1	-0.530669	-1.05924	-0.00209675	-2.07947	0.049172	0.265231	0.0232518	-0.445277	0.491781	0.102791	0.91904	0.986362	-0.231828	-0.7604	0.296744	-0.908438	0.373279	0.773523	-0.264793	-0.793365	0.263779	-1.03761	0.310477	0.599078	-0.0754845	-0.646407	0.495438	-0.273851	0.786699	0.878705	0.936798
P12259	F5	0.01233	-0.52595	0.55061	0.0474448	0.962578	0.986123	0.0440534	-0.433081	0.521188	0.191237	0.850056	0.963757	0.101401	-0.43688	0.639681	0.39018	0.700074	0.930987	0.485878	-0.0524024	1.02416	1.86962	0.0746128	0.311457	0.145155	-0.436254	0.726565	0.517112	0.610126	0.764806	0.00923103
P12429	ANXA3	-0.314324	-0.72986	0.101211	-1.56676	0.131134	0.369631	-0.0188774	-0.38721	0.349456	-0.106154	0.916402	0.986362	-0.246475	-0.662011	0.16906	-1.22857	0.231936	0.682215	-0.279422	-0.694957	0.136114	-1.39279	0.1773	0.450433	0.0569742	-0.391856	0.505804	0.262924	0.795003	0.880735	0.163971
P12814;P12814-2;P12814-3	ACTN1	0.0839129	-0.30932	0.477146	0.44199	0.662717	0.824348	-0.132538	-0.481101	0.216026	-0.787572	0.439169	0.818556	-0.051916	-0.445149	0.341317	-0.273454	0.787	0.948326	-0.513459	-0.906692	-0.120226	-2.70452	0.0127969	0.120839	-0.422766	-0.847506	0.00197414	-2.06163	0.050986	0.173694	0.994616
P12829	MYL4	-0.600394	-1.00816	-0.192626	-3.0497	0.00577971	0.137172	-0.0814911	-0.442939	0.279957	-0.46698	0.645007	0.909956	-0.308024	-0.715792	0.0997438	-1.56461	0.131638	0.620476	-0.205632	-0.6134	0.202136	-1.04451	0.307348	0.596935	-0.32311	-0.76355	0.11733	-1.51949	0.142574	0.32852	0.0720055
P12955	PEPD	0.264685	0.0122561	0.517114	2.17182	0.0406773	0.237818	0.241361	0.0176067	0.465116	2.23424	0.0357122	0.407184	0.101025	-0.151404	0.353454	0.828943	0.415848	0.798069	0.0988374	-0.153592	0.351266	0.810991	0.425871	0.685951	0.0368133	-0.235841	0.309468	0.279657	0.782296	0.877158	0.899125
P13489	RNH1	-0.199385	-0.386037	-0.0127328	-2.21255	0.0373713	0.231377	-0.0321033	-0.197553	0.133346	-0.401901	0.691551	0.93641	-0.105313	-0.291965	0.081339	-1.16865	0.254785	0.690446	-0.100355	-0.287007	0.0862968	-1.11363	0.277199	0.565518	-0.206635	-0.408243	-0.00502806	-2.12291	0.0449954	0.158598	0.899125
P13639	EEF2	-0.778947	-1.16802	-0.38987	-4.14673	0.000405863	0.0555598	-0.0491402	-0.39402	0.29574	-0.295123	0.770607	0.954502	-0.927002	-1.31608	-0.537925	-4.93491	5.82e-05	0.0207081	-0.896578	-1.28566	-0.507501	-4.77294	8.66e-05	0.00616619	-0.376753	-0.797004	0.0434984	-1.85687	0.0764762	0.225004	0.899125
P13645	KRT10	2.07532	0.332701	3.81794	2.4667	0.021706	0.213054	0.6413	-0.903368	2.18597	0.859923	0.398905	0.79197	0.93065	-0.811971	2.67327	1.10616	0.28035	0.714639	0.970774	-0.771847	2.71339	1.15385	0.260677	0.544288	-0.284387	-2.16663	1.59786	-0.312944	0.757207	0.863992	0.119226
P13647	KRT5	2.11872	0.11741	4.12004	2.19277	0.0389452	0.236818	0.856772	-0.917202	2.63075	1.00035	0.327784	0.77019	0.984036	-1.01728	2.98535	1.01843	0.319307	0.735749	1.37572	-0.62559	3.37704	1.4238	0.168231	0.446839	0.171096	-1.99057	2.33276	0.16394	0.871243	0.924421	0.119226
P13671	C6	0.525236	0.0971788	0.953294	2.54148	0.0184188	0.213054	0.0815037	-0.297929	0.460936	0.444915	0.660634	0.915119	0.49495	0.0668928	0.923008	2.39493	0.0253659	0.429673	0.4482	0.0201421	0.876257	2.16872	0.0409397	0.221819	0.517281	0.0549257	0.979636	2.31731	0.0299598	0.12402	0.981581
P13716	ALAD	-0.100427	-0.365384	0.164531	-0.785069	0.440606	0.688254	-0.0345084	-0.269368	0.200351	-0.304334	0.763672	0.954502	-0.187113	-0.452071	0.0778441	-1.46272	0.157378	0.634427	-0.180877	-0.445834	0.084081	-1.41397	0.171065	0.449237	-0.302903	-0.58909	-0.0167165	-2.19224	0.0389881	0.144123	0.981581
P13796	LCP1	-0.0774792	-0.367122	0.212163	-0.55406	0.585005	0.780007	-0.270892	-0.527633	-0.0141516	-2.18542	0.0395448	0.407184	-0.357423	-0.647065	-0.0677805	-2.55596	0.0178384	0.401974	-0.480209	-0.769852	-0.190567	-3.43402	0.00231675	0.0434085	-0.299299	-0.612148	0.0135508	-1.98154	0.0598843	0.194994	0.981581
P13798	APEH	-0.0546284	-0.307884	0.198628	-0.446779	0.659308	0.824348	-0.0258275	-0.250315	0.19866	-0.2383	0.813806	0.954502	-0.101746	-0.355002	0.15151	-0.832132	0.414083	0.796831	-0.086426	-0.339682	0.16683	-0.706835	0.486928	0.717791	-0.12986	-0.403408	0.143688	-0.983277	0.335931	0.518835	0.981581
P14174	MIF	-0.167781	-0.86616	0.530598	-0.497606	0.623592	0.799996	0.215029	-0.404018	0.834076	0.71946	0.479267	0.831697	0.470449	-0.22793	1.16883	1.39526	0.176564	0.662129	0.421367	-0.277012	1.11975	1.24969	0.224261	0.499088	0.0648412	-0.689494	0.819177	0.178041	0.860285	0.919849	0.981581
P14324;P14324-2	FDPS	-0.121769	-0.445254	0.201717	-0.779677	0.443709	0.688254	0.291496	0.00475675	0.578235	2.10562	0.0466186	0.436743	0.0356551	-0.28783	0.35914	0.228297	0.821478	0.958465	0.13585	-0.187636	0.459335	0.869835	0.39358	0.66539	0.083189	-0.266215	0.432593	0.493142	0.626693	0.776945	0.981581
P14550	AKR1A1	0.154073	-0.303504	0.611649	0.697422	0.492686	0.721994	0.0512898	-0.354308	0.456888	0.26192	0.795767	0.954502	0.11077	-0.346806	0.568346	0.50141	0.620956	0.898619	-0.0853574	-0.542934	0.372219	-0.386377	0.702849	0.859129	-0.109116	-0.603355	0.385123	-0.457284	0.651854	0.790726	0.981581
P14618	PKM	-0.0420352	-0.457432	0.373361	-0.209596	0.83587	0.921268	-0.102526	-0.470736	0.265683	-0.576731	0.569849	0.876313	-0.221518	-0.636915	0.193878	-1.10454	0.281038	0.714639	-0.115567	-0.530964	0.299829	-0.576243	0.570173	0.785817	-0.272194	-0.720873	0.176485	-1.25654	0.221816	0.421631	0.981581
P14735	IDE	0.0575349	-0.372663	0.487733	0.277011	0.784302	0.897786	0.257051	-0.124278	0.638381	1.39622	0.176279	0.621341	-0.0834571	-0.513655	0.346741	-0.401817	0.691612	0.930987	0.394827	-0.0353715	0.825025	1.90095	0.0701992	0.30853	-0.112073	-0.57674	0.352594	-0.499568	0.622232	0.774526	0.981581
P14868;P14868-2	DARS	0.963069	-0.0740634	2.0002	1.92334	0.0671874	0.289924	1.02962	0.110303	1.94894	2.31977	0.0298032	0.407184	0.898216	-0.138916	1.93535	1.79383	0.0862985	0.599783	0.167974	-0.869158	1.20511	0.335461	0.740386	0.874228	-1.04112	-2.16135	0.0791148	-1.92498	0.0669723	0.206426	0.833688
P15121	AKR1B1	-0.230432	-0.599071	0.138207	-1.29472	0.208552	0.483678	0.0377278	-0.289036	0.364491	0.239145	0.813159	0.954502	-0.179492	-0.54813	0.189147	-1.0085	0.323941	0.736888	-0.003476	-0.372115	0.365163	-0.0195305	0.98459	0.988756	-0.470564	-0.868739	-0.0723883	-2.44781	0.0226186	0.112618	0.833688
P15169	CPN1	0.770434	0.320141	1.22073	3.54384	0.00177671	0.108833	0.44671	0.0475675	0.845852	2.3181	0.0299098	0.407184	0.554421	0.104128	1.00471	2.55022	0.0180662	0.401974	0.762671	0.312378	1.21296	3.50813	0.00193715	0.0405636	0.9251	0.438728	1.41147	3.93961	0.000675809	0.013366	0.203097
P15311	EZR	0.167918	-0.993318	1.32915	0.29951	0.767301	0.889354	0.687101	-0.342225	1.71643	1.38262	0.180359	0.629489	0.28608	-0.875156	1.44732	0.510271	0.614834	0.893391	0.0488406	-1.1124	1.21008	0.0871152	0.931351	0.974967	0.294005	-0.960274	1.54828	0.485505	0.632014	0.779825	0.203097
P15374	UCHL3	-0.264792	-0.562736	0.0331529	-1.84078	0.0788854	0.308606	0.00718947	-0.25691	0.271289	0.0563849	0.955533	0.993462	-0.184552	-0.482496	0.113393	-1.28297	0.212567	0.682215	-0.075753	-0.373698	0.222191	-0.526621	0.603612	0.804869	-0.194061	-0.515878	0.127756	-1.249	0.224509	0.421631	0.421631
P15531	NME1	-1.51472	-2.99468	-0.0347566	-2.1199	0.0452745	0.251839	-0.594487	-1.90633	0.717359	-0.938627	0.357894	0.776892	-0.348507	-1.82847	1.13145	-0.487747	0.63045	0.904693	-0.0278359	-1.5078	1.45213	-0.0389572	0.969268	0.981584	0.0413292	-1.55721	1.63987	0.053551	0.957766	0.974185	0.421631
P16152	CBR1	-0.0851573	-0.294596	0.124281	-0.84217	0.40856	0.676499	-0.0677748	-0.253422	0.117872	-0.756159	0.457402	0.825172	-0.24377	-0.453208	-0.0343318	-2.41078	0.0245116	0.429673	-0.0412026	-0.250641	0.168236	-0.407477	0.687511	0.851317	-0.166365	-0.392584	0.0598541	-1.52323	0.141639	0.328169	0.421631
P16157	ANK1	-0.232512	-0.446088	-0.0189349	-2.25489	0.0341953	0.230302	-0.0895446	-0.27886	0.0997709	-0.979686	0.337663	0.77019	-0.158167	-0.371744	0.0554094	-1.5339	0.139003	0.62676	-0.117484	-0.331061	0.0960926	-1.13935	0.266546	0.553296	-0.272972	-0.503661	-0.0422826	-2.45089	0.0224673	0.112618	0.421631
P16157-4;P16157-9	ANK1	-0.309694	-0.885302	0.265914	-1.1144	0.276877	0.560164	-0.181356	-0.691578	0.328865	-0.73622	0.469207	0.829514	-0.169893	-0.745501	0.405715	-0.611339	0.547105	0.857771	-0.147694	-0.723301	0.427914	-0.531459	0.600311	0.803424	-0.706207	-1.32793	-0.0844799	-2.3527	0.0277781	0.122819	0.422939
P16157;P16157-8	ANK1	-0.395232	-1.15702	0.366551	-1.07462	0.293939	0.573563	0.235721	-0.439528	0.910969	0.723049	0.477103	0.830555	0.00585611	-0.755927	0.767639	0.0159225	0.987437	0.995632	-0.416312	-1.17809	0.345471	-1.13193	0.269587	0.556366	-0.0321865	-0.855006	0.790633	-0.081022	0.936141	0.960414	0.731508
P16403	HIST1H1C	-0.152077	-0.722489	0.418334	-0.552216	0.586247	0.780201	-0.31204	-0.817656	0.193576	-1.27827	0.214189	0.680814	-0.35011	-0.920522	0.220301	-1.27131	0.216611	0.682215	-0.4448	-1.01521	0.125611	-1.61514	0.120224	0.384209	-0.350872	-0.966987	0.265243	-1.17956	0.250502	0.441478	0.829493
P16452	EPB42	-0.328164	-0.568584	-0.087744	-2.82718	0.00968097	0.163153	-0.174044	-0.387154	0.0390659	-1.69157	0.104541	0.569926	-0.134859	-0.375279	0.105561	-1.16183	0.257486	0.694432	-0.162693	-0.403114	0.0777268	-1.40163	0.174677	0.450433	-0.370077	-0.629761	-0.110394	-2.95177	0.00726297	0.0575798	0.374014
P16930	FAH	-0.419499	-0.957635	0.118637	-1.61463	0.120335	0.360009	-0.110347	-0.587353	0.36666	-0.479147	0.63646	0.909956	-0.151051	-0.689187	0.387085	-0.581386	0.566762	0.867816	-0.206491	-0.744626	0.331645	-0.794771	0.435054	0.685951	-0.138935	-0.720189	0.442318	-0.495087	0.625341	0.776945	0.0063936
P17081;P60953	CDC42;RHOQ	-0.274713	-0.985421	0.435995	-0.800612	0.431733	0.688254	-0.372352	-1.00233	0.257623	-1.22423	0.233535	0.684266	0.340029	-0.37068	1.05074	0.990964	0.332246	0.750981	0.229608	-0.481101	0.940316	0.669158	0.510206	0.737176	-0.854852	-1.6225	-0.0871994	-2.30653	0.0306548	0.124421	0.270585
P17174	GOT1	-0.14618	-0.376519	0.0841589	-1.31448	0.201933	0.477661	-0.0102962	-0.21447	0.193877	-0.104451	0.917737	0.986362	-0.0515212	-0.28186	0.178818	-0.46329	0.647609	0.911688	-0.10052	-0.330859	0.129819	-0.903893	0.375633	0.655516	-0.136058	-0.384853	0.112736	-1.13271	0.269269	0.45946	0.462422
P17812	CTPS1	-0.317349	-1.14143	0.506728	-0.797634	0.433425	0.688254	-0.42796	-1.15843	0.302506	-1.21349	0.237533	0.690299	-0.244672	-1.06875	0.579406	-0.614964	0.544751	0.857771	-0.189396	-1.01347	0.634682	-0.476031	0.638644	0.820784	-0.609824	-1.49993	0.280282	-1.41905	0.169597	0.370008	0.441478
P17858	PFKL	-0.046769	-0.31496	0.221422	-0.361199	0.721321	0.855612	0.0428852	-0.194841	0.280611	0.373649	0.712164	0.947778	0.119469	-0.148722	0.38766	0.922665	0.365975	0.772452	-0.0223509	-0.290542	0.24584	-0.172618	0.864496	0.936866	-0.129598	-0.419278	0.160082	-0.926646	0.363948	0.547846	0.327517
P17931	LGALS3	-0.416214	-0.748978	-0.0834502	-2.59068	0.0165159	0.209988	-0.176066	-0.471029	0.118898	-1.23634	0.229087	0.684266	-0.260497	-0.593261	0.0722668	-1.62144	0.118861	0.620476	-0.478741	-0.811505	-0.145977	-2.97987	0.00680355	0.078131	0.0415818	-0.317844	0.401008	0.239622	0.812793	0.889311	0.106223
P17980	PSMC3	-0.144826	-0.463427	0.173775	-0.941529	0.356438	0.623548	-0.0237852	-0.306195	0.258625	-0.174446	0.863076	0.966211	-0.145989	-0.46459	0.172612	-0.949088	0.352664	0.760899	-0.128366	-0.446967	0.190235	-0.834521	0.412764	0.680297	-0.299029	-0.643158	0.0450994	-1.79981	0.0853217	0.244956	0.0433049
P17987	TCP1	-0.168899	-0.392265	0.0544681	-1.56618	0.13127	0.369631	0.0433364	-0.154657	0.24133	0.453353	0.654639	0.912139	0.08729	-0.136077	0.310657	0.80943	0.426749	0.805028	-0.0633941	-0.286761	0.159973	-0.587846	0.562492	0.779172	-0.135191	-0.376454	0.106073	-1.16062	0.25797	0.448225	0.039983
P18135	IGKV3-20	0.231502	-0.209009	0.672014	1.08851	0.287899	0.573563	0.170294	-0.220178	0.560766	0.903325	0.375928	0.784928	0.116047	-0.324465	0.556559	0.545645	0.590682	0.874596	-0.0486756	-0.489187	0.391836	-0.228869	0.821039	0.909144	0.411575	-0.0642321	0.887382	1.79164	0.0866571	0.246135	0.0063936
P18206	VCL	-0.030093	-0.509023	0.448837	-0.130145	0.897609	0.962325	-0.241506	-0.666032	0.183019	-1.17831	0.250992	0.700809	-0.155454	-0.634383	0.323476	-0.6723	0.508241	0.838928	-0.205656	-0.684586	0.273273	-0.889414	0.383196	0.659022	-0.243039	-0.760342	0.274264	-0.973116	0.340847	0.521898	0.878705
P18428	LBP	0.325404	-0.320324	0.971132	1.04378	0.307679	0.585206	-0.489066	-1.06144	0.0833104	-1.76978	0.090322	0.55439	0.226977	-0.41875	0.872705	0.728059	0.47409	0.820044	0.026696	-0.619032	0.672424	0.0856308	0.932518	0.974967	0.23727	-0.460195	0.934736	0.704619	0.48828	0.659688	0.764806
P18577;P18577-10;P18577-11;P18577-4;P18577-9	RHCE	-0.0919591	-0.584925	0.401007	-0.386377	0.702849	0.844009	-0.110803	-0.547771	0.326165	-0.525212	0.604576	0.893236	0.0301918	-0.462775	0.523158	0.126854	0.900183	0.974667	-0.0680115	-0.560978	0.424955	-0.285758	0.777679	0.893611	0.0439654	-0.488499	0.57643	0.171023	0.865735	0.920005	0.880735
P18669	PGAM1	0.119706	-0.180261	0.419673	0.826562	0.417169	0.682091	0.0968557	-0.169036	0.362748	0.75449	0.458383	0.825172	0.0162425	-0.283724	0.316209	0.112154	0.911697	0.974667	-0.00540565	-0.305373	0.294561	-0.0373258	0.970555	0.981584	-0.176795	-0.500796	0.147206	-1.1302	0.2703	0.45946	0.173694
P19652	ORM2	0.445953	-0.0361525	0.928058	1.91593	0.0681713	0.292397	0.25556	-0.171781	0.6829	1.23866	0.228245	0.684266	-0.013918	-0.496023	0.468187	-0.0597958	0.952846	0.989491	-0.128839	-0.610944	0.353266	-0.553529	0.585363	0.791184	0.384308	-0.136425	0.905041	1.52861	0.140304	0.328169	0.32852
P19823	ITIH2	0.420269	-0.0276729	0.86821	1.9433	0.0645996	0.287759	0.436223	0.0391657	0.833281	2.27556	0.0327353	0.407184	0.15239	-0.295551	0.600332	0.704644	0.488265	0.823734	0.335216	-0.112725	0.783158	1.55002	0.135095	0.404697	0.834903	0.35107	1.31873	3.57417	0.00165072	0.0250066	0.877158
P19827	ITIH1	0.363361	-0.137678	0.864401	1.5021	0.146982	0.394488	0.419283	-0.024841	0.863408	1.95541	0.0630725	0.503259	0.11842	-0.38262	0.61946	0.489538	0.629201	0.904693	0.112459	-0.388581	0.613499	0.464896	0.646476	0.827022	0.831576	0.290391	1.37276	3.18266	0.00422501	0.0429744	0.158598
P20073;P20073-2	ANXA7	0.0319159	-0.259725	0.323557	0.226669	0.822729	0.913858	-0.00214976	-0.260662	0.256363	-0.0172243	0.98641	0.993462	-0.0936262	-0.385268	0.198015	-0.664939	0.512851	0.838928	-0.280286	-0.571927	0.0113557	-1.99061	0.0588122	0.279162	-0.413501	-0.72851	-0.0984925	-2.71887	0.0123886	0.0794654	0.225004
P20340-2;P20340-4	RAB6A	-0.000583107	-0.684383	0.683217	-0.00176625	0.998606	0.999399	-0.243714	-0.849838	0.36241	-0.832824	0.413701	0.802602	-1.03906	-1.72286	-0.355259	-3.14735	0.00459318	0.306139	-1.08959	-1.77339	-0.405791	-3.30041	0.00319248	0.0528615	-0.372855	-1.11144	0.365734	-1.04561	0.306849	0.489859	0.863992
P20618	PSMB1	-0.203018	-0.7281	0.322064	-0.80083	0.431609	0.688254	-0.361205	-0.82664	0.10423	-1.60741	0.121913	0.574788	-0.22242	-0.747502	0.302662	-0.877366	0.389564	0.78209	-0.234043	-0.759125	0.291039	-0.923214	0.365695	0.642647	-0.083351	-0.650504	0.483802	-0.304399	0.763622	0.868529	0.924421
P20810;P20810-10;P20810-2;P20810-3;P20810-4;P20810-5;P20810-6;P20810-7;P20810-8;P20810-9	CAST	-0.15965	-0.467425	0.148125	-1.07441	0.294032	0.573563	-0.0706023	-0.343416	0.202211	-0.536028	0.597202	0.893236	0.0422157	-0.265559	0.34999	0.284102	0.778931	0.948326	-0.178667	-0.486441	0.129108	-1.20239	0.241721	0.523116	-0.167719	-0.500154	0.164716	-1.04498	0.307133	0.489859	0.12402
P21281	ATP6V1B2	0.147666	-0.377816	0.673149	0.582045	0.566326	0.769511	0.308976	-0.156815	0.774766	1.37394	0.183001	0.635449	0.00916822	-0.516314	0.534651	0.0361377	0.971491	0.990977	0.214988	-0.310494	0.740471	0.847403	0.405699	0.677253	0.151228	-0.416358	0.718814	0.551868	0.586481	0.737764	0.144123
P21333	FLNA	-0.342289	-0.785501	0.100922	-1.59962	0.123639	0.363418	-0.355401	-0.748266	0.0374641	-1.87374	0.0740187	0.522022	0.0474417	-0.39577	0.490653	0.221709	0.826541	0.958465	-0.40405	-0.847262	0.0391613	-1.88824	0.0719609	0.310522	-0.388583	-0.867306	0.0901401	-1.68125	0.10655	0.278911	0.194994
P21980	TGM2	-0.266443	-0.476473	-0.0564127	-2.62758	0.0152115	0.207718	-0.0792462	-0.265418	0.106925	-0.881654	0.38729	0.79197	-0.126517	-0.336547	0.083513	-1.24767	0.224986	0.682215	-0.15243	-0.36246	0.0575999	-1.50322	0.146695	0.414472	-0.250572	-0.47743	-0.0237135	-2.28776	0.0319008	0.12689	0.518835
P22061;P22061-2	PCMT1	-0.169365	-0.35505	0.0163199	-1.88921	0.0718253	0.297806	-0.0518327	-0.216425	0.112759	-0.652271	0.520838	0.838434	-0.081257	-0.266942	0.104428	-0.906395	0.374336	0.773523	-0.052937	-0.238622	0.132748	-0.590495	0.560746	0.779051	-0.212196	-0.412759	-0.0116338	-2.1914	0.0390563	0.144123	0.919849
P22234	PAICS	-0.438907	-0.806141	-0.0716741	-2.47551	0.0212921	0.213054	0.133072	-0.192445	0.45859	0.846733	0.406064	0.80088	-0.0315454	-0.398779	0.335688	-0.177921	0.860378	0.9718	-0.246152	-0.613385	0.121082	-1.38833	0.178634	0.450433	0.058583	-0.338074	0.45524	0.305907	0.762489	0.868529	0.776945
P22301	IL10	0.00348585	-0.271995	0.278967	0.026209	0.979322	0.993264	-0.175411	-0.419598	0.0687771	-1.48787	0.150672	0.586223	-0.268351	-0.543832	0.00712951	-2.01765	0.0557144	0.568163	-0.407573	-0.683054	-0.132093	-3.06442	0.00558361	0.0744325	-0.341239	-0.638792	-0.0436861	-2.37535	0.026459	0.119233	0.790726
P22314;P22314-2	UBA1	0.00793086	-0.233493	0.249355	0.0680413	0.946354	0.977046	0.115125	-0.0988745	0.329125	1.11427	0.27693	0.715585	-0.015126	-0.25655	0.226298	-0.129771	0.897901	0.974667	-0.0300374	-0.271462	0.211387	-0.257701	0.798981	0.89769	-0.0619491	-0.322717	0.198819	-0.492056	0.627449	0.776945	0.421631
P22352	GPX3	0.529197	0.0622672	0.996126	2.34747	0.0280911	0.216596	-0.0435425	-0.457431	0.370346	-0.217903	0.829469	0.954502	0.451524	-0.0154058	0.918453	2.00292	0.0573836	0.568163	1.58979	1.12286	2.05672	7.05216	3.95e-07	9.38e-05	0.253861	-0.250481	0.758202	1.04257	0.308226	0.489859	0.774526
P22392-2	NME2	0.0117102	-0.220462	0.243883	0.104469	0.917723	0.962325	-0.0419008	-0.2477	0.163898	-0.421709	0.677241	0.92198	-0.144707	-0.37688	0.0874652	-1.29096	0.20983	0.682215	-0.137441	-0.369614	0.0947311	-1.22614	0.23283	0.510206	-0.0716585	-0.322433	0.179116	-0.591858	0.559849	0.720818	0.206426
P22792	CPN2	0.563996	0.108048	1.01994	2.56209	0.0175979	0.213054	0.52894	0.124786	0.933095	2.71078	0.0126173	0.274412	0.471754	0.015807	0.927702	2.14306	0.0431686	0.529931	0.792953	0.337006	1.2489	3.60219	0.00154212	0.0381291	1.14782	0.655342	1.6403	4.82747	7.57e-05	0.00539221	0.112618
P23083	IGHV1-2	0.370035	-1.0398	1.77987	0.543638	0.592039	0.783454	0.887077	-0.362605	2.13676	1.47027	0.155343	0.587965	0.439364	-0.970468	1.84919	0.645492	0.52514	0.848878	0.834684	-0.575147	2.24452	1.22628	0.232779	0.510206	0.721172	-0.80162	2.24396	0.980916	0.337069	0.519466	0.013366
P23142	FBLN1	0.453641	-0.975367	1.88265	0.657524	0.517518	0.744389	-0.211035	-1.47772	1.05564	-0.345082	0.733239	0.951668	0.153119	-1.27589	1.58213	0.221936	0.826367	0.958465	-0.820679	-2.24969	0.608329	-1.18952	0.246642	0.530866	-0.813349	-2.35685	0.730156	-1.09145	0.286631	0.468077	0.779825
P23276	KEL	-0.499763	-1.42741	0.427883	-1.11588	0.276257	0.560164	0.0385437	-0.783726	0.860814	0.0970895	0.923515	0.986362	0.267723	-0.659923	1.19537	0.597775	0.555962	0.8632	0.186029	-0.741616	1.11368	0.415368	0.681809	0.845728	-1.05661	-2.05859	-0.0546416	-2.18421	0.0396447	0.144213	0.421631
P23381	WARS	-0.168516	-0.70808	0.371047	-0.646893	0.524249	0.74653	0.0525794	-0.425693	0.530851	0.227706	0.821932	0.954502	-0.322433	-0.861997	0.217131	-1.23774	0.228578	0.682215	-0.126741	-0.666305	0.412822	-0.48653	0.631299	0.818734	-0.263208	-0.846003	0.319587	-0.935442	0.359497	0.544946	0.974185
P23526	AHCY	-0.124337	-0.348205	0.0995305	-1.15038	0.262071	0.548807	-0.0381593	-0.236597	0.160278	-0.3983	0.694165	0.936434	-0.133877	-0.357745	0.0899906	-1.23865	0.228248	0.682215	-0.131221	-0.355089	0.0926464	-1.21408	0.237313	0.515144	-0.280814	-0.522619	-0.0390095	-2.4054	0.0247984	0.11771	0.328169
P23528	CFL1	-0.0108244	-0.254361	0.232712	-0.0920608	0.927465	0.965431	0.0667832	-0.149089	0.282655	0.640773	0.528146	0.839375	0.0226644	-0.220872	0.266201	0.192759	0.848878	0.968591	-0.0324127	-0.275949	0.211124	-0.275667	0.785321	0.893611	-0.0917321	-0.354782	0.171318	-0.722299	0.477555	0.655142	0.112618
P23588	EIF4B	-0.468749	-0.959149	0.0216513	-1.97981	0.0600911	0.287708	-0.176165	-0.610859	0.258528	-0.839404	0.410077	0.802066	-0.229704	-0.720104	0.260696	-0.970177	0.342277	0.753092	0.0900444	-0.400356	0.580445	0.380312	0.707282	0.860829	-0.108469	-0.638161	0.421224	-0.424144	0.67549	0.807785	0.122819
P23634;P23634-2;P23634-3;P23634-4;P23634-5;P23634-6;P23634-7;P23634-8	ATP2B4	-0.428474	-0.92358	0.0666322	-1.7925	0.0865159	0.322015	0.0728896	-0.365975	0.511754	0.344008	0.734036	0.951668	0.0654906	-0.429615	0.560597	0.273977	0.786603	0.948326	-0.276589	-0.771695	0.218517	-1.1571	0.259375	0.544288	-0.420911	-0.955687	0.113864	-1.63024	0.116977	0.289193	0.960414
P23921	RRM1	-0.352156	-1.02713	0.322813	-1.08065	0.291305	0.573563	0.56846	-0.0298363	1.16676	1.96796	0.0615222	0.503259	0.103196	-0.571774	0.778165	0.316673	0.754412	0.939059	0.0961687	-0.5788	0.771138	0.29511	0.770617	0.888131	0.53731	-0.19174	1.26636	1.52651	0.140824	0.328169	0.441478
P24666	ACP1	-0.122069	-0.345765	0.101628	-1.13026	0.270276	0.556175	0.012155	-0.186131	0.210441	0.126969	0.900093	0.985948	-0.093217	-0.316913	0.130479	-0.863118	0.397184	0.786611	-0.0263481	-0.250044	0.197348	-0.243964	0.809471	0.901946	-0.159148	-0.400768	0.0824712	-1.36428	0.185977	0.38269	0.0575798
P25311	AZGP1	0.645544	0.324167	0.966921	4.1605	0.000392319	0.0555598	0.147463	-0.137407	0.432333	1.07219	0.295007	0.735609	0.307553	-0.0138233	0.62893	1.98217	0.05981	0.568163	0.468347	0.14697	0.789724	3.01847	0.00621785	0.0750358	0.55418	0.207054	0.901307	3.30672	0.00314473	0.039983	0.776945
P25325	MPST	-0.0988966	-0.352584	0.154791	-0.807451	0.427864	0.688254	-0.0461997	-0.271069	0.17867	-0.425541	0.674487	0.92198	0.0580396	-0.195648	0.311727	0.47387	0.640161	0.911589	-0.0480664	-0.301754	0.205621	-0.392443	0.698426	0.858859	-0.0509302	-0.324944	0.223083	-0.384979	0.70387	0.823942	0.124421
P25686;P25686-2	DNAJB2	0.688004	0.167737	1.20827	2.73904	0.0118354	0.183191	1.29773	0.836566	1.7589	5.82855	6.68e-06	0.00475814	0.30063	-0.219637	0.820897	1.19685	0.24383	0.68884	0.642058	0.121791	1.16233	2.55612	0.017832	0.144277	0.366989	-0.194963	0.928942	1.35266	0.189609	0.385247	0.124421
P25786;P25786-2	PSMA1	0.0183809	-0.212332	0.249093	0.165017	0.870405	0.947597	0.224939	0.0204346	0.429444	2.27822	0.0325519	0.407184	0.125118	-0.105595	0.35583	1.12326	0.273174	0.709301	0.2445	0.0137877	0.475213	2.19504	0.0387618	0.21731	-0.0852244	-0.334422	0.163974	-0.708358	0.486001	0.659688	0.45946
P25787	PSMA2	-0.112104	-0.384739	0.160531	-0.851673	0.403374	0.669469	-0.0328365	-0.274502	0.208829	-0.281434	0.780951	0.954502	-0.0423268	-0.314962	0.230308	-0.321564	0.750752	0.936204	-0.21513	-0.487765	0.0575054	-1.63438	0.116101	0.379193	-0.21032	-0.5048	0.0841591	-1.47931	0.152928	0.342406	0.370008
P25788;P25788-2	PSMA3	-0.289727	-0.621486	0.0420316	-1.80884	0.0838651	0.319315	-0.28502	-0.579092	0.00905297	-2.00749	0.0568606	0.493716	-0.281943	-0.613701	0.0498161	-1.76024	0.0919624	0.60585	-0.255468	-0.587227	0.0762905	-1.59495	0.12468	0.389638	-0.30714	-0.66548	0.0512003	-1.77531	0.0893827	0.248197	0.547846
P25789	PSMA4	-0.0923369	-0.353894	0.16922	-0.73121	0.472201	0.704837	0.0733685	-0.158477	0.305214	0.655457	0.518823	0.838434	0.00611814	-0.255439	0.267675	0.0484492	0.961786	0.990672	-0.0452032	-0.306761	0.216354	-0.357961	0.72371	0.868121	-0.152682	-0.435196	0.129832	-1.11939	0.274787	0.46028	0.889311
P25815	S100P	-0.109219	-0.88036	0.661923	-0.293357	0.771939	0.889354	-0.300112	-0.983656	0.383432	-0.909391	0.372787	0.784928	-0.437449	-1.20859	0.333693	-1.17497	0.252297	0.690446	-0.575415	-1.34656	0.195727	-1.54554	0.136172	0.404697	-0.789073	-1.622	0.0438552	-1.9622	0.0622296	0.197801	0.244956
P26038	MSN	-0.171833	-0.444711	0.101045	-1.30428	0.205329	0.479426	-0.26162	-0.5035	-0.0197392	-2.24029	0.0352617	0.407184	-0.133491	-0.406369	0.139387	-1.01325	0.321719	0.736888	-0.321582	-0.59446	-0.0487041	-2.44094	0.0229592	0.166806	-0.46575	-0.760492	-0.171008	-3.27299	0.00340845	0.0410624	0.448225
P26447	S100A4	-0.236135	-0.450423	-0.0218477	-2.28243	0.0322631	0.227335	-0.137453	-0.327398	0.0524929	-1.49885	0.147819	0.581747	-0.0637664	-0.278054	0.150521	-0.616352	0.543851	0.857771	-0.106339	-0.320626	0.107949	-1.02785	0.314951	0.602809	-0.257952	-0.489408	-0.0264946	-2.30835	0.0305367	0.124421	0.246135
P27105	STOM	-0.416213	-0.66912	-0.163306	-3.4087	0.00246237	0.134862	-0.301512	-0.525691	-0.0773341	-2.78577	0.0106422	0.274412	-0.0944746	-0.347382	0.158433	-0.773727	0.44715	0.819986	-0.145196	-0.398104	0.107711	-1.18913	0.246793	0.530866	-0.53832	-0.811491	-0.265149	-4.08169	0.000476435	0.012069	0.521898
P27169	PON1	0.388781	0.0365879	0.740974	2.28643	0.0319911	0.227335	0.482479	0.170293	0.794665	3.2011	0.00404428	0.158388	0.298539	-0.0536541	0.650732	1.75571	0.0927496	0.60585	0.589524	0.23733	0.941717	3.467	0.00213959	0.0423163	0.909015	0.528603	1.28943	4.94937	5.61e-05	0.00444135	0.659688
P27348	YWHAQ	-0.633867	-1.18095	-0.0867863	-2.39983	0.025099	0.213054	-0.159649	-0.644585	0.325286	-0.681895	0.502268	0.838434	-0.293472	-0.840553	0.253608	-1.11109	0.278267	0.714639	-0.337794	-0.884875	0.209287	-1.27889	0.213974	0.489229	-0.298842	-0.889757	0.292073	-1.04749	0.306	0.489859	0.920005
P27348;P31946;P61981	YWHAB;YWHAG;YWHAQ	-0.147994	-0.75993	0.463942	-0.500923	0.621293	0.799606	-0.509628	-1.05205	0.032795	-1.94603	0.0642525	0.503259	0.0912449	-0.520691	0.703181	0.308842	0.760285	0.940715	-0.897262	-1.5092	-0.285326	-3.03702	0.00595395	0.0744442	-0.359451	-1.02042	0.301515	-1.1264	0.271871	0.45946	0.45946
P28066	PSMA5	-0.0473479	-0.341493	0.246797	-0.333406	0.741916	0.876027	-0.00762327	-0.268355	0.253108	-0.0605594	0.952245	0.993462	-0.173391	-0.467535	0.120754	-1.22095	0.234751	0.682215	0.0194923	-0.274652	0.313637	0.137258	0.892049	0.952232	-0.216125	-0.533838	0.101588	-1.40898	0.172518	0.370008	0.328169
P28070	PSMB4	-0.324141	-0.601435	-0.0468475	-2.42118	0.0239655	0.213054	-0.0790156	-0.32481	0.166779	-0.665846	0.512281	0.838434	-0.251471	-0.528765	0.0258227	-1.87837	0.0733558	0.599783	-0.0657546	-0.343048	0.211539	-0.491156	0.628075	0.81611	-0.236114	-0.535625	0.063398	-1.63283	0.116428	0.288839	0.0250066
P28072	PSMB6	-0.110795	-0.370945	0.149356	-0.882119	0.387044	0.651526	-0.108165	-0.338764	0.122434	-0.971549	0.341609	0.77019	-0.209939	-0.47009	0.0502114	-1.67148	0.108484	0.61312	-0.0300025	-0.290153	0.230148	-0.238873	0.813368	0.902784	-0.190322	-0.471317	0.0906727	-1.40289	0.174304	0.370008	0.0429744
P28074	PSMB5	-0.148554	-0.355347	0.0582386	-1.48793	0.150657	0.400252	-0.0968761	-0.280178	0.0864261	-1.09467	0.285247	0.727933	-0.186247	-0.393039	0.0205461	-1.86546	0.0752153	0.599783	-0.138998	-0.345791	0.0677946	-1.39222	0.177471	0.450433	-0.3213	-0.544661	-0.0979379	-2.97944	0.00681037	0.0557355	0.0794654
P28161	GSTM2	0.0855672	-0.627232	0.798366	0.248642	0.805894	0.907366	-0.264889	-0.896717	0.36694	-0.868356	0.394372	0.79197	0.0294767	-0.683322	0.742276	0.0856536	0.9325	0.985074	0.223047	-0.489752	0.935846	0.64813	0.523463	0.746905	0.263206	-0.506705	1.03312	0.708091	0.486163	0.659688	0.489859
P28289	TMOD1	-0.231193	-0.566155	0.103769	-1.4296	0.166578	0.425534	-0.0851494	-0.382061	0.211763	-0.594002	0.558439	0.8729	-0.220474	-0.555436	0.114488	-1.36331	0.186278	0.66648	-0.102671	-0.437633	0.232291	-0.634874	0.531917	0.751438	-0.0983651	-0.460165	0.263435	-0.563127	0.57892	0.731508	0.868529
P28482;P28482-2	MAPK1	-0.328564	-0.745546	0.0884187	-1.63206	0.116592	0.358202	0.00234702	-0.367268	0.371962	0.0131523	0.989622	0.993462	0.0620043	-0.354978	0.478987	0.307991	0.760924	0.940715	-0.131641	-0.548623	0.285342	-0.653891	0.519812	0.744681	-0.190764	-0.641156	0.259629	-0.877279	0.38961	0.569615	0.489859
P29144	TPP2	-0.173718	-0.416286	0.0688507	-1.48335	0.151861	0.400463	0.007585	-0.207429	0.222599	0.0730672	0.942399	0.993462	-0.0920279	-0.334596	0.150541	-0.785812	0.440179	0.815309	-0.0665028	-0.309071	0.176066	-0.567857	0.575758	0.785817	-0.157188	-0.419192	0.104816	-1.24264	0.226801	0.422939	0.737764
P29401;P29401-2	TKT	0.0480145	-0.200608	0.296637	0.400005	0.692927	0.841918	0.0930404	-0.12734	0.313421	0.874443	0.391119	0.79197	-0.00781181	-0.256435	0.240811	-0.0650795	0.948686	0.988967	-0.0849045	-0.333527	0.163718	-0.707332	0.486625	0.717791	-0.00278679	-0.27133	0.265757	-0.0214943	0.983041	0.991395	0.278911
P29622	SERPINA4	0.950052	0.392709	1.5074	3.53068	0.00183426	0.108833	0.89229	0.398257	1.38632	3.74097	0.00109962	0.135526	0.317628	-0.239716	0.874971	1.1804	0.250176	0.690446	0.971137	0.413793	1.52848	3.60903	0.00151668	0.0381291	1.57247	0.970473	2.17447	5.41029	1.83e-05	0.00216571	0.12689
P30041	PRDX6	-0.0231934	-0.283714	0.237327	-0.184398	0.855354	0.939833	0.0589327	-0.171994	0.289859	0.528586	0.60227	0.893236	-0.0451058	-0.305626	0.215414	-0.358612	0.72323	0.930987	-0.0895508	-0.350071	0.170969	-0.71197	0.483804	0.717791	-0.167147	-0.448541	0.114247	-1.23032	0.231292	0.425529	0.144123
P30043	BLVRB	-0.090016	-0.295396	0.115364	-0.90781	0.373604	0.642268	-0.0467812	-0.228831	0.135269	-0.532249	0.599773	0.893236	-0.140624	-0.346004	0.0647561	-1.41819	0.169843	0.660812	-0.153516	-0.358896	0.0518643	-1.54821	0.135531	0.404697	-0.17429	-0.396126	0.0475462	-1.62732	0.117599	0.289725	0.868529
P30044;P30044-2	PRDX5	0.397657	-0.402803	1.19812	1.02897	0.314433	0.585206	0.795149	0.0856177	1.50468	2.32119	0.0297132	0.407184	0.354388	-0.446071	1.15485	0.917009	0.368868	0.772452	0.0667233	-0.733736	0.867183	0.172652	0.864469	0.936866	0.784322	-0.0802729	1.64892	1.87895	0.0732734	0.217378	0.119233
P30046	DDT	-0.0371287	-0.281549	0.207292	-0.314635	0.755939	0.879459	0.0859842	-0.130671	0.30264	0.822021	0.419695	0.804084	0.0173885	-0.227032	0.261809	0.147353	0.884166	0.974667	0.0290569	-0.215363	0.273477	0.246233	0.807735	0.901422	-0.213642	-0.477647	0.0503616	-1.67614	0.107559	0.279495	0.776945
P30085	CMPK1	-0.167405	-0.412023	0.0772131	-1.41747	0.170052	0.429461	0.172071	-0.0447599	0.388902	1.64369	0.114148	0.574788	0.137943	-0.106675	0.382561	1.168	0.255038	0.690446	0.124749	-0.11987	0.369367	1.05628	0.302053	0.595739	0.0712825	-0.192935	0.3355	0.558798	0.581822	0.733198	0.489859
P30086	PEBP1	-0.23795	-0.531059	0.0551592	-1.68147	0.106507	0.338541	-0.131824	-0.391638	0.12799	-1.05091	0.30446	0.741873	-0.224587	-0.517696	0.0685226	-1.58704	0.126464	0.620476	-0.123499	-0.416608	0.169611	-0.872702	0.392048	0.664615	-0.40096	-0.717554	-0.0843658	-2.6232	0.0153611	0.0892794	0.720818
P30153	PPP2R1A	0.0896995	-0.310969	0.490368	0.463702	0.647318	0.818633	0.00463303	-0.350521	0.359788	0.0270198	0.978682	0.993462	-0.0680425	-0.468711	0.332626	-0.351746	0.728303	0.930987	-0.153546	-0.554214	0.247123	-0.793755	0.435634	0.685951	-0.0361208	-0.468892	0.39665	-0.172875	0.864296	0.919849	0.00539221
P30566	ADSL	-0.0568307	-0.251603	0.137942	-0.604351	0.551659	0.760763	-0.0635945	-0.236242	0.109053	-0.762945	0.453425	0.825172	-0.135855	-0.330628	0.0589176	-1.44471	0.162328	0.635041	-0.0911161	-0.285889	0.103656	-0.968949	0.342876	0.625322	-0.171801	-0.38218	0.038577	-1.69145	0.104563	0.275737	0.519466
P30613	PKLR	-0.125155	-0.352262	0.101951	-1.14144	0.265695	0.552009	0.0215936	-0.179715	0.222902	0.222176	0.826182	0.954502	-0.0797691	-0.306876	0.147338	-0.727509	0.47442	0.820044	-0.171659	-0.398766	0.0554474	-1.56556	0.131414	0.398156	-0.124915	-0.370219	0.120388	-1.05474	0.302744	0.488783	0.468077
P30626;P30626-2;P30626-3	SRI	0.0542009	-0.147153	0.255554	0.557547	0.582661	0.779802	0.098793	-0.0796878	0.277274	1.14649	0.263646	0.712099	-0.0194699	-0.220823	0.181884	-0.20028	0.843062	0.967635	-0.0419633	-0.243317	0.15939	-0.431662	0.670097	0.838504	-0.0433437	-0.26083	0.174143	-0.412788	0.68367	0.810316	0.144213
P30740	SERPINB1	0.194094	-0.0583713	0.446559	1.59237	0.125261	0.363418	0.166665	-0.0571209	0.390452	1.54257	0.136889	0.581747	-0.0563939	-0.308859	0.196071	-0.462663	0.648051	0.911688	-0.0160067	-0.268472	0.236458	-0.131321	0.896689	0.955752	-0.0311713	-0.303865	0.241522	-0.236763	0.814984	0.889982	0.544946
P31146	CORO1A	-0.092438	-0.532636	0.34776	-0.434946	0.667747	0.826844	-0.186337	-0.576531	0.203857	-0.989127	0.333124	0.77019	0.0817835	-0.358415	0.521982	0.384814	0.70399	0.930987	-0.0948005	-0.534999	0.345398	-0.446063	0.659817	0.834706	-0.14632	-0.621788	0.329149	-0.637404	0.530298	0.699208	0.11771
P31939;P31939-2	ATIC	-0.0789388	-0.27565	0.117773	-0.831179	0.41461	0.682091	0.059065	-0.115301	0.233431	0.701619	0.490114	0.837687	-0.0545308	-0.251242	0.142181	-0.574177	0.571547	0.872253	-0.0168707	-0.213582	0.179841	-0.177638	0.860598	0.936866	-0.184848	-0.39732	0.027625	-1.80196	0.0849733	0.244956	0.655142
P31946	YWHAB	-0.127854	-0.343376	0.0876684	-1.22873	0.231877	0.515926	-0.155574	-0.346614	0.0354657	-1.68674	0.105478	0.569926	-0.268907	-0.484428	-0.0533846	-2.5843	0.0167518	0.401974	-0.261928	-0.47745	-0.0464066	-2.51724	0.0194296	0.148751	-0.255323	-0.488113	-0.0225328	-2.27174	0.0330007	0.129815	0.807785
P31946-2	YWHAB	-0.379145	-0.860734	0.102443	-1.63066	0.116889	0.358202	-0.218306	-0.645188	0.208577	-1.05923	0.300739	0.738367	-0.469027	-0.950616	0.0125611	-2.01723	0.0557613	0.568163	-0.370182	-0.851771	0.111406	-1.59211	0.125319	0.389638	-0.280123	-0.800298	0.240052	-1.11541	0.276454	0.460972	0.289193
P31948	STIP1	-0.148414	-0.402995	0.106167	-1.20749	0.23979	0.525764	-0.106261	-0.331923	0.1194	-0.975329	0.339772	0.77019	-0.121255	-0.375835	0.133326	-0.986523	0.334372	0.753092	-0.0539182	-0.308499	0.200662	-0.438676	0.665082	0.83664	-0.239075	-0.514053	0.0359037	-1.80081	0.0851586	0.244956	0.328169
P32119	PRDX2	-0.210667	-0.442089	0.0207558	-1.88549	0.0723478	0.297806	-0.156935	-0.362069	0.0481993	-1.58458	0.127023	0.574788	-0.200483	-0.431906	0.0309389	-1.79435	0.0862128	0.599783	-0.258408	-0.48983	-0.0269851	-2.31278	0.0302505	0.1976	-0.330092	-0.580057	-0.0801277	-2.73521	0.0119386	0.0779839	0.38269
P34932	HSPA4	-0.370667	-0.751193	0.00985916	-2.01759	0.0557211	0.280001	0.135964	-0.201336	0.473264	0.834911	0.41255	0.802556	-0.0330705	-0.413596	0.347455	-0.180007	0.858759	0.9718	0.0732115	-0.307314	0.453737	0.3985	0.69402	0.856399	-0.241046	-0.65206	0.169969	-1.21472	0.237074	0.431705	0.039983
P35241;P35241-5	RDX	0.110563	-0.0790294	0.300155	1.20788	0.239644	0.525764	0.0254325	-0.142623	0.193488	0.313451	0.756827	0.954502	0.0107682	-0.178824	0.20036	0.11764	0.907397	0.974667	-0.169211	-0.358803	0.0203817	-1.84859	0.0777081	0.314365	0.0206415	-0.184142	0.225425	0.208776	0.836502	0.901043	0.823942
P35527	KRT9	1.51076	0.116671	2.90484	2.2446	0.0349436	0.230302	0.900242	-0.335483	2.13597	1.50894	0.145236	0.581747	1.22687	-0.167218	2.62095	1.82281	0.0816546	0.599783	1.11448	-0.279608	2.50856	1.65583	0.111645	0.3718	-0.0631691	-1.56895	1.44261	-0.0868912	0.931527	0.957067	0.385247
P35542	SAA4	0.688623	0.213872	1.16337	3.00434	0.00642643	0.141491	0.1323	-0.288522	0.553123	0.651173	0.521533	0.838434	0.161334	-0.313418	0.636085	0.70387	0.488738	0.823734	0.0623203	-0.412431	0.537072	0.271892	0.788185	0.893611	0.64899	0.1362	1.16178	2.62139	0.0154233	0.0892794	0.659688
P35579	MYH9	-0.298626	-0.753627	0.156374	-1.35941	0.187492	0.458744	-0.310545	-0.713859	0.0927698	-1.59483	0.124708	0.574788	-0.18335	-0.63835	0.27165	-0.834647	0.412695	0.796311	-0.321752	-0.776753	0.133248	-1.46468	0.156847	0.42952	-0.555437	-1.04689	-0.0639802	-2.3409	0.0284885	0.122932	0.342406
P35611;P35611-3	ADD1	-0.147977	-0.339612	0.0436575	-1.59939	0.123689	0.363418	-0.140837	-0.310703	0.0290288	-1.71729	0.099667	0.567703	-0.196181	-0.387816	-0.00454614	-2.12039	0.0452287	0.53385	-0.160646	-0.352281	0.0309888	-1.73632	0.0961887	0.347646	-0.303582	-0.510572	-0.0965932	-3.03782	0.00594271	0.0509784	0.248197
P35612	ADD2	-0.112099	-0.325021	0.100822	-1.09048	0.287048	0.573563	0.0024743	-0.186261	0.191209	0.0271539	0.978576	0.993462	-0.117668	-0.33059	0.0952536	-1.14465	0.26439	0.70018	-0.0394614	-0.252383	0.17346	-0.383872	0.704679	0.859129	-0.319464	-0.549446	-0.0894825	-2.87715	0.00863102	0.0646872	0.46028
P35754	GLRX	-0.0674643	-0.678149	0.543221	-0.228818	0.821078	0.913449	-0.0201455	-0.56146	0.521169	-0.0770835	0.939239	0.993462	-0.167644	-0.778329	0.443041	-0.568597	0.575264	0.873322	-0.342735	-0.95342	0.26795	-1.16245	0.25724	0.541878	-0.978076	-1.63769	-0.318461	-3.07125	0.00549478	0.0489036	0.197801
P35813;P35813-2;P35813-3	PPM1A	-0.14776	-0.447363	0.151843	-1.02151	0.317874	0.585206	0.0296135	-0.235956	0.295183	0.230964	0.819431	0.954502	-0.0392694	-0.338872	0.260333	-0.271483	0.788496	0.948326	-0.136102	-0.435705	0.1635	-0.940921	0.356743	0.637731	-0.367456	-0.691064	-0.0438478	-2.3519	0.0278254	0.122819	0.0410624
P35858;P35858-2	IGFALS	0.78718	0.166937	1.40742	2.62873	0.0151725	0.207718	0.898885	0.349099	1.44867	3.38644	0.00259771	0.135526	0.385084	-0.235158	1.00533	1.28596	0.211539	0.682215	0.570446	-0.0497964	1.19069	1.90496	0.0696512	0.308023	1.67222	1.00228	2.34216	5.17003	3.27e-05	0.00291236	0.124421
P35908	KRT2	2.11122	0.272381	3.95006	2.37806	0.0263052	0.213054	0.524014	-1.10594	2.15397	0.665887	0.512256	0.838434	0.934023	-0.904817	2.77286	1.05208	0.303938	0.723758	0.733164	-1.10568	2.572	0.82583	0.417575	0.682441	-0.262142	-2.24832	1.72403	-0.273371	0.787063	0.878705	0.012069
P35998	PSMC2	-0.0278227	-0.223064	0.167418	-0.295162	0.770577	0.889354	0.0564445	-0.116618	0.229507	0.675541	0.506219	0.838434	-0.00786054	-0.203102	0.187381	-0.0833902	0.934279	0.985491	0.0138819	-0.181359	0.209123	0.147269	0.884232	0.945305	-0.179275	-0.39016	0.0316094	-1.7608	0.0918662	0.252543	0.00444135
P36507	MAP2K2	-0.325456	-0.64047	-0.0104415	-2.13991	0.04345	0.245527	0.214249	-0.0649814	0.493479	1.58924	0.125966	0.574788	0.18483	-0.130184	0.499845	1.21528	0.236864	0.685557	-0.186458	-0.501472	0.128557	-1.22598	0.232889	0.510206	-0.146044	-0.486299	0.19421	-0.889025	0.3834	0.562847	0.489859
P36955	SERPINF1	0.484698	0.0285956	0.9408	2.20111	0.038274	0.234923	0.38308	-0.0212116	0.787371	1.96258	0.0621821	0.503259	0.0817775	-0.374325	0.537879	0.371369	0.713839	0.930987	-0.20297	-0.659072	0.253132	-0.921728	0.366453	0.642647	1.054	0.561352	1.54664	4.43137	0.000201048	0.00715731	0.45946
P36959	GMPR	-0.164951	-0.599667	0.269766	-0.785926	0.440114	0.688254	-0.14321	-0.528545	0.242125	-0.769783	0.449439	0.825172	-0.273037	-0.707754	0.16168	-1.30092	0.206459	0.682215	-0.123984	-0.558701	0.310732	-0.590737	0.560587	0.779051	-0.3107	-0.780248	0.158847	-1.37055	0.184039	0.380919	0.45946
P36969;P36969-2	GPX4	-0.166096	-0.930564	0.598372	-0.450023	0.657002	0.824348	-0.18947	-0.867098	0.488158	-0.579138	0.568252	0.875747	0.0877639	-0.676704	0.852232	0.237788	0.814198	0.958197	-0.132638	-0.897105	0.63183	-0.359369	0.722671	0.868121	0.113869	-0.71185	0.939589	0.285633	0.777774	0.876226	0.45946
P36980;Q03591	CFHR1;CFHR2	0.103141	-0.562973	0.769256	0.320714	0.751389	0.878101	0.0612493	-0.529198	0.651697	0.214859	0.831813	0.954502	0.201991	-0.464123	0.868106	0.628084	0.536276	0.857771	0.44513	-0.220984	1.11124	1.38411	0.179906	0.450433	-0.0777855	-0.797272	0.6417	-0.223929	0.824834	0.895247	0.370008
P37802	TAGLN2	-0.0644427	-0.283095	0.15421	-0.610453	0.547682	0.760763	-0.0600299	-0.253845	0.133785	-0.641525	0.527666	0.839375	-0.149369	-0.368021	0.0692841	-1.41494	0.170783	0.660858	-0.258661	-0.477314	-0.0400082	-2.45025	0.0224989	0.166806	-0.180642	-0.416814	0.0555301	-1.58425	0.127099	0.305236	0.288839
P37837	TALDO1	-0.160607	-0.376306	0.0550916	-1.54224	0.136971	0.380949	-0.094486	-0.285683	0.0967105	-1.02358	0.316919	0.758273	-0.0853232	-0.301022	0.130376	-0.81932	0.421202	0.802812	-0.195614	-0.411313	0.020085	-1.87839	0.0733534	0.311457	-0.348775	-0.581756	-0.115794	-3.10069	0.00512744	0.0462119	0.370008
P37840;P37840-2	SNCA	-0.0489724	-0.271952	0.174007	-0.454905	0.653539	0.823574	0.0880955	-0.109555	0.285746	0.923188	0.365708	0.781329	-0.0145673	-0.237547	0.208412	-0.135316	0.893566	0.974667	-0.0531531	-0.276133	0.169826	-0.493739	0.626278	0.81611	-0.115014	-0.355859	0.125831	-0.989113	0.333131	0.516751	0.0557355
P38606;P38606-2	ATP6V1A	-0.405336	-1.01655	0.205876	-1.37359	0.183107	0.454259	0.00205017	-0.539731	0.543831	0.0078379	0.993815	0.995213	-0.207396	-0.818608	0.403816	-0.702817	0.489381	0.823734	-0.287217	-0.898429	0.323994	-0.973313	0.340751	0.625322	-0.19553	-0.855714	0.464654	-0.613454	0.545731	0.710349	0.659688
P40227	CCT6A	-0.046704	-0.315432	0.222024	-0.359977	0.722223	0.855612	0.154718	-0.0834841	0.392921	1.34533	0.191927	0.644586	-0.0599451	-0.328674	0.208783	-0.462034	0.648496	0.911688	-0.129129	-0.397858	0.139599	-0.995279	0.330189	0.617046	-0.178799	-0.469059	0.111461	-1.27589	0.215015	0.416008	0.731508
P40925;P40925-3	MDH1	-0.0983252	-0.334776	0.138126	-0.861306	0.39816	0.665211	0.0764555	-0.133136	0.286047	0.755561	0.457753	0.825172	0.10491	-0.131541	0.341361	0.918988	0.367854	0.772452	0.0938156	-0.142635	0.330266	0.821803	0.419816	0.682441	-0.106169	-0.361566	0.149227	-0.861031	0.398308	0.578766	0.569615
P41091	EIF2S3	-0.562221	-1.1604	0.0359625	-1.94673	0.0641631	0.287759	-0.062215	-0.592448	0.468018	-0.243031	0.810184	0.954502	-0.40377	-1.00195	0.194413	-1.39809	0.175724	0.662129	-0.3689	-0.967083	0.229284	-1.27734	0.21451	0.489229	-0.435835	-1.08195	0.210276	-1.39717	0.175997	0.370008	0.422939
P43034	PAFAH1B1	-0.196103	-0.646321	0.254114	-0.902186	0.376519	0.642881	-0.0703182	-0.469393	0.328757	-0.364961	0.71855	0.948165	-0.0886656	-0.538883	0.361552	-0.407912	0.687196	0.930987	-0.0399441	-0.490162	0.410273	-0.183766	0.855844	0.936038	-0.471637	-0.957927	0.0146536	-2.00884	0.0567072	0.187793	0.991395
P43487;P43487-2	RANBP1	-0.293095	-0.767213	0.181023	-1.28043	0.213443	0.489134	-0.241187	-0.661447	0.179074	-1.18869	0.246963	0.695411	-0.301908	-0.776026	0.17221	-1.31893	0.200465	0.68199	-0.547499	-1.02162	-0.0733812	-2.39183	0.0255361	0.175774	-0.518812	-1.03092	-0.00670672	-2.09838	0.047313	0.164326	0.00216571
P43652	AFM	0.549021	0.156256	0.941786	2.89527	0.00827776	0.163153	0.724648	0.376498	1.0728	4.31117	0.000270503	0.0962992	0.51109	0.118325	0.903855	2.69525	0.0130675	0.401974	0.601927	0.209162	0.994692	3.17428	0.00430974	0.0639277	1.50521	1.08097	1.92944	7.34893	2.05e-07	0.000145752	0.425529
P43686	PSMC4	-0.33976	-0.82485	0.14533	-1.45072	0.160664	0.418236	0.277637	-0.15235	0.707624	1.33738	0.194467	0.647011	-0.0923982	-0.577488	0.392692	-0.394525	0.69691	0.930987	-0.00388203	-0.488972	0.481208	-0.0165756	0.986921	0.989701	0.200272	-0.323686	0.724229	0.791694	0.43681	0.614642	0.289725
P45378;P45378-2;P45378-3;P45378-5;P45378-6;P45378-7	TNNT3	0.327466	-0.518668	1.1736	0.801606	0.43117	0.688254	0.670874	-0.0791442	1.42089	1.85269	0.0770957	0.527809	0.75118	-0.0949547	1.59731	1.83882	0.0791845	0.599783	0.32641	-0.519724	1.17254	0.799021	0.432636	0.685951	1.07294	0.159014	1.98687	2.43163	0.0234284	0.114253	0.217378
P45974;P45974-2	USP5	-0.0710641	-0.323409	0.18128	-0.583298	0.565497	0.769511	0.0161672	-0.207512	0.239847	0.149707	0.88233	0.978535	-0.118093	-0.370438	0.134252	-0.969312	0.342699	0.753092	-0.128254	-0.380599	0.12409	-1.05272	0.30365	0.596935	-0.296755	-0.569319	-0.024192	-2.25509	0.0341802	0.132263	0.279495
P46109	CRKL	-0.0646046	-0.628108	0.498899	-0.237466	0.814445	0.911769	-0.0321759	-0.531668	0.467317	-0.133424	0.895044	0.984243	-0.266449	-0.829953	0.297054	-0.979381	0.33781	0.753092	-0.115107	-0.678611	0.448396	-0.423097	0.676243	0.843231	-0.441416	-1.05007	0.167237	-1.50214	0.146971	0.334325	0.733198
P46459	NSF	-0.000432938	-1.17704	1.17617	-0.000762128	0.999399	0.999399	0.742367	-0.300583	1.78532	1.47431	0.154259	0.587965	0.0335991	-1.14301	1.2102	0.0591467	0.953358	0.989491	0.0420365	-1.13457	1.21864	0.0739997	0.941665	0.976886	1.43788	0.166996	2.70876	2.34342	0.0283353	0.122932	0.0892794
P46926	GNPDA1	0.1771	-0.673731	1.02793	0.43113	0.670478	0.82773	-9.7e-05	-0.754277	0.754083	-0.000266467	0.99979	0.99979	-0.154165	-1.005	0.696665	-0.375299	0.710954	0.930987	-0.266295	-1.11713	0.584535	-0.648267	0.523377	0.746905	-0.0944348	-1.01344	0.824567	-0.212838	0.833371	0.899639	0.919849
P47756;P47756-2	CAPZB	-0.213379	-0.45529	0.0285308	-1.82697	0.0810061	0.311764	-0.160956	-0.375386	0.0534747	-1.55473	0.133972	0.574788	-0.171485	-0.413395	0.0704252	-1.46827	0.155879	0.634427	-0.199982	-0.441893	0.041928	-1.71226	0.100604	0.351577	-0.312105	-0.573398	-0.0508121	-2.47404	0.0213606	0.108634	0.275737
P48426	PIP4K2A	-0.0244678	-0.250148	0.201212	-0.224562	0.824347	0.91423	-0.0425558	-0.242599	0.157488	-0.440623	0.663692	0.915792	-0.0367165	-0.262396	0.188963	-0.336979	0.739257	0.931808	-0.179061	-0.404741	0.0466184	-1.6434	0.114209	0.376467	-0.0485284	-0.29229	0.195234	-0.412348	0.683988	0.810316	0.488783
P48506	GCLC	-0.0727868	-0.369573	0.223999	-0.507975	0.616417	0.797839	-0.00203078	-0.265103	0.261042	-0.015989	0.987384	0.993462	-0.0335831	-0.330369	0.263203	-0.234375	0.816814	0.958465	-0.00852475	-0.305311	0.288261	-0.0594938	0.953084	0.976886	-0.305142	-0.625707	0.0154235	-1.9716	0.0610797	0.196782	0.810316
P48507	GCLM	-0.267226	-0.537066	0.00261328	-2.0512	0.052074	0.276692	0.161462	-0.0777249	0.40065	1.39819	0.175693	0.621341	-0.119497	-0.389337	0.150342	-0.917247	0.368745	0.772452	-0.0422428	-0.312083	0.227597	-0.324251	0.748745	0.87538	-0.266382	-0.557842	0.025078	-1.89304	0.0712917	0.215305	0.889982
P48637	GSS	0.201612	-0.152435	0.555658	1.17948	0.250535	0.534075	-0.017447	-0.331276	0.296382	-0.115149	0.909349	0.986362	0.0719742	-0.282072	0.426021	0.421066	0.677703	0.927932	0.308249	-0.0457975	0.662295	1.80333	0.0847515	0.330043	-0.35736	-0.739774	0.0250536	-1.93556	0.0655927	0.203939	0.699208
P48643	CCT5	-0.0947863	-0.294361	0.104788	-0.983726	0.335715	0.60361	0.134831	-0.0420731	0.311735	1.57865	0.12838	0.574788	0.028337	-0.171237	0.227911	0.294091	0.771385	0.946487	0.0153143	-0.18426	0.214889	0.158937	0.875137	0.941491	-0.155046	-0.370611	0.0605188	-1.48976	0.150178	0.337309	0.244956
P48729;P48729-3	CSNK1A1	0.277623	-0.456563	1.01181	0.783218	0.441669	0.688254	0.310982	-0.339804	0.961768	0.98976	0.332821	0.77019	0.24285	-0.491336	0.977035	0.685118	0.50027	0.834175	0.0911755	-0.64301	0.825361	0.257221	0.799347	0.89769	0.0605307	-0.73248	0.853542	0.158099	0.875789	0.925166	0.129815
P48741	HSPA7	-0.0671844	-0.2961	0.161732	-0.607891	0.54935	0.760763	-0.0383642	-0.241277	0.164548	-0.391607	0.699034	0.938253	-0.0953422	-0.324258	0.133574	-0.862665	0.397427	0.786611	-0.141722	-0.370638	0.0871946	-1.28231	0.212794	0.489229	-0.25418	-0.501438	-0.00692285	-2.12925	0.0444137	0.157326	0.460972
P49189	ALDH9A1	-0.160699	-0.408274	0.086876	-1.34444	0.192212	0.462348	-0.0502195	-0.269671	0.169232	-0.473988	0.640078	0.909956	-0.0737908	-0.321366	0.173784	-0.617347	0.543206	0.857771	-0.0501806	-0.297755	0.197394	-0.41982	0.6786	0.844691	-0.145584	-0.412995	0.121828	-1.12763	0.271363	0.45946	0.244956
P49247	RPIA	-0.191367	-0.469111	0.0863777	-1.4271	0.167288	0.425534	-0.190055	-0.436249	0.0561389	-1.59895	0.123787	0.574788	-0.196816	-0.47456	0.0809287	-1.46774	0.156023	0.634427	-0.120303	-0.398047	0.157442	-0.897148	0.379144	0.65562	-0.281026	-0.581024	0.0189719	-1.94027	0.0649866	0.203097	0.0779839
P49327	FASN	0.0748442	-0.453359	0.603048	0.293488	0.77184	0.889354	-0.212879	-0.681081	0.255323	-0.941745	0.35633	0.776892	-0.181226	-0.709429	0.346978	-0.710644	0.48461	0.823734	-0.393548	-0.921752	0.134655	-1.54323	0.13673	0.404697	-0.0137826	-0.584307	0.556742	-0.0500369	0.960535	0.974218	0.431705
P49368	CCT3	-0.0671375	-0.307134	0.172858	-0.579422	0.568064	0.7701	0.220985	0.00825169	0.433719	2.1516	0.0424153	0.425197	0.11723	-0.122766	0.357226	1.01174	0.322424	0.736888	0.0604064	-0.17959	0.300402	0.52133	0.607233	0.806623	0.0488235	-0.210402	0.308049	0.390109	0.700126	0.821236	0.901043
P49720	PSMB3	-0.12347	-0.385187	0.138247	-0.977152	0.338888	0.604733	0.146377	-0.0856102	0.378365	1.3069	0.204452	0.664703	0.0225268	-0.23919	0.284244	0.178279	0.8601	0.9718	0.144238	-0.117479	0.405955	1.14151	0.265666	0.553081	-0.181523	-0.46421	0.101164	-1.33002	0.196842	0.391485	0.957067
P49721	PSMB2	-0.127933	-0.352376	0.0965092	-1.18063	0.250088	0.534075	-0.165185	-0.364132	0.0337623	-1.71975	0.0992113	0.567703	-0.278495	-0.502937	-0.0540521	-2.57007	0.0172894	0.401974	-0.173487	-0.39793	0.0509555	-1.60102	0.123328	0.388537	-0.278367	-0.520792	-0.035941	-2.37833	0.02629	0.119226	0.0892794
P49773	HINT1	-0.181525	-0.486038	0.122989	-1.2347	0.229686	0.514375	-0.114694	-0.384616	0.155229	-0.880106	0.38811	0.79197	-0.185343	-0.489857	0.119171	-1.26068	0.220349	0.682215	-0.0448045	-0.349318	0.259709	-0.304753	0.763356	0.885753	-0.412586	-0.741498	-0.0836733	-2.59817	0.016243	0.0917859	0.122932
P49908	SELENOP	0.568648	-0.57696	1.71426	1.02811	0.314827	0.585206	-0.064958	-1.08043	0.950515	-0.132495	0.895771	0.984243	0.168166	-0.977441	1.31377	0.304044	0.763889	0.940985	1.04122	-0.104385	2.18683	1.88253	0.0727659	0.311457	0.611507	-0.625891	1.8489	1.02359	0.316914	0.499209	0.0509784
P50395	GDI2	-0.180297	-0.373765	0.0131708	-1.93025	0.0662817	0.287759	-0.111861	-0.283352	0.0596302	-1.35105	0.190117	0.644586	-0.196661	-0.390129	-0.00319343	-2.10544	0.046635	0.53385	-0.183709	-0.377177	0.00975875	-1.96678	0.0616671	0.287479	-0.274412	-0.483381	-0.065443	-2.71991	0.0123593	0.0794654	0.0646872
P50502	ST13	-0.0149214	-0.332495	0.302652	-0.0973194	0.923335	0.963951	0.101602	-0.179896	0.383101	0.747586	0.462456	0.825234	-0.0365293	-0.354103	0.281044	-0.238249	0.813846	0.958197	0.0871471	-0.230426	0.404721	0.568385	0.575406	0.785817	0.0203433	-0.322675	0.363362	0.122839	0.903325	0.937562	0.0489036
P50552	VASP	0.0770886	-0.552751	0.706928	0.253509	0.802178	0.907366	-0.408614	-0.966907	0.149679	-1.51595	0.143462	0.581747	-0.185548	-0.815387	0.444291	-0.610183	0.547857	0.857771	-0.468746	-1.09859	0.161093	-1.54149	0.137151	0.404697	-0.150765	-0.831069	0.529539	-0.459019	0.650626	0.790726	0.122819
P50570;P50570-2;P50570-3;P50570-4;P50570-5	DNM2	-0.404111	-1.05836	0.250133	-1.27937	0.213811	0.489134	0.258034	-0.321891	0.83796	0.921592	0.366523	0.781329	-0.0238228	-0.678067	0.630422	-0.07542	0.940547	0.98606	-0.327047	-0.981291	0.327198	-1.03539	0.311492	0.599271	-0.229457	-0.936122	0.477208	-0.672546	0.508088	0.682563	0.00291236
P50990;P50990-2	CCT8	-0.120817	-0.363759	0.122126	-1.03005	0.313938	0.585206	0.126331	-0.0890147	0.341676	1.21509	0.236936	0.690299	0.0261788	-0.216764	0.269121	0.223193	0.8254	0.958465	-0.113826	-0.356768	0.129117	-0.970446	0.342146	0.625322	-0.203353	-0.465761	0.0590549	-1.60512	0.122419	0.297483	0.878705
P50991	CCT4	-0.176861	-0.426867	0.0731453	-1.46526	0.156691	0.410162	0.0811036	-0.140503	0.302711	0.758038	0.456299	0.825172	-0.00496208	-0.254968	0.245044	-0.0411099	0.967571	0.990977	-0.153508	-0.403515	0.0964979	-1.27179	0.216443	0.489229	-0.208247	-0.478285	0.0617903	-1.59731	0.124153	0.300671	0.252543
P51148	RAB5C	-0.148418	-0.601454	0.304619	-0.678557	0.504342	0.731347	0.155314	-0.24626	0.556888	0.801086	0.431464	0.81056	-0.168592	-0.621628	0.284444	-0.770794	0.448851	0.819986	0.0786395	-0.374397	0.531676	0.359535	0.722549	0.868121	0.420828	-0.0685066	0.910163	1.78128	0.088378	0.247737	0.562847
P51665	PSMD7	-0.00239775	-0.221364	0.216569	-0.0226809	0.982105	0.993264	0.325786	0.131693	0.519879	3.47662	0.00209047	0.135526	0.0900929	-0.128873	0.309059	0.85221	0.403082	0.788683	0.0321498	-0.186816	0.251116	0.304113	0.763838	0.885753	0.0489064	-0.187604	0.285417	0.4283	0.672506	0.806715	0.00715731
P51884	LUM	0.621918	0.0985381	1.1453	2.46122	0.0219673	0.213054	0.516683	0.052756	0.98061	2.30679	0.0306381	0.407184	0.375489	-0.147891	0.898869	1.48598	0.151168	0.634427	-0.124089	-0.647469	0.399291	-0.491077	0.62813	0.81611	1.01723	0.451917	1.58255	3.72703	0.00113771	0.0184102	0.380919
P52209	PGD	-0.154073	-0.36705	0.0589027	-1.49841	0.147933	0.394488	-0.0368055	-0.225589	0.151978	-0.403815	0.690163	0.93641	-0.0847279	-0.297704	0.128248	-0.824004	0.418591	0.801173	-0.0714839	-0.28446	0.141492	-0.695202	0.49405	0.720827	-0.207809	-0.437849	0.0222315	-1.87109	0.0744004	0.219805	0.876226
P52565	ARHGDIA	-0.346079	-0.627142	-0.0650147	-2.55037	0.0180603	0.213054	-0.164927	-0.414064	0.084209	-1.37116	0.183852	0.635449	-0.325449	-0.606512	-0.0443848	-2.39834	0.0251797	0.429673	-0.266766	-0.54783	0.0142975	-1.96589	0.0617756	0.287479	-0.444169	-0.747753	-0.140586	-3.03043	0.00604645	0.0512508	0.895247
P52566	ARHGDIB	0.069388	-0.312769	0.451545	0.376076	0.710384	0.848647	-0.0229041	-0.36165	0.315842	-0.140047	0.88987	0.980785	0.0837649	-0.298392	0.465922	0.453998	0.654181	0.912933	0.0130478	-0.369109	0.395205	0.070718	0.944247	0.976886	-0.240606	-0.653383	0.172171	-1.20733	0.239851	0.433437	0.895247
P52907	CAPZA1	-0.231712	-0.441639	-0.0217845	-2.28619	0.0320071	0.227335	-0.206033	-0.392114	-0.0199527	-2.29335	0.0315253	0.407184	-0.308063	-0.51799	-0.098136	-3.03952	0.00591917	0.30642	-0.432432	-0.642359	-0.222505	-4.26661	0.000301956	0.0165279	-0.34365	-0.570397	-0.116903	-3.13912	0.00468326	0.0433049	0.305236
P53004	BLVRA	-0.255279	-0.499126	-0.0114322	-2.16836	0.0409699	0.237818	0.0101559	-0.205991	0.226303	0.0973204	0.923334	0.986362	-0.112826	-0.356673	0.131021	-0.958355	0.348074	0.758421	-0.0434556	-0.287303	0.200391	-0.369116	0.715494	0.86638	-0.261653	-0.525038	0.00173145	-2.05764	0.0513996	0.174269	0.0462119
P53396	ACLY	-0.204984	-0.399794	-0.0101747	-2.17944	0.0400398	0.237818	-0.178269	-0.35095	-0.00558907	-2.1383	0.0435947	0.425197	-0.203789	-0.398598	-0.00897888	-2.16672	0.0411094	0.51616	-0.27398	-0.468789	-0.07917	-2.91301	0.00794545	0.0883931	-0.376121	-0.58654	-0.165703	-3.70235	0.00120836	0.0191189	0.516751
P54105	CLNS1A	0.58504	-0.0351729	1.20525	1.95379	0.0632741	0.287759	0.834569	0.284809	1.38433	3.14429	0.00462647	0.164702	0.537183	-0.0830299	1.1574	1.79397	0.0862749	0.599783	0.89797	0.277757	1.51818	2.99885	0.00650929	0.0759773	0.264131	-0.405776	0.934037	0.816654	0.422693	0.604331	0.710349
P54578	USP14	-0.14329	-0.348981	0.0624012	-1.44289	0.162835	0.419009	0.00848974	-0.173836	0.190816	0.096445	0.924021	0.986362	-0.0294874	-0.235179	0.176204	-0.29693	0.769245	0.945946	-0.0944884	-0.30018	0.111203	-0.951473	0.351479	0.633552	-0.288983	-0.511155	-0.0668116	-2.69412	0.0131006	0.0818211	0.416008
P54725	RAD23A	0.0896419	-0.234341	0.413625	0.573089	0.57227	0.771698	-0.0311099	-0.31829	0.25607	-0.224377	0.82449	0.954502	-0.0729609	-0.396944	0.251022	-0.466446	0.645383	0.911688	-0.394911	-0.718894	-0.0709283	-2.52471	0.0191128	0.148751	-0.286322	-0.636264	0.0636196	-1.6947	0.103936	0.275103	0.578766
P54725-3	RAD23A	0.581429	-0.379907	1.54277	1.25272	0.223176	0.506056	0.454138	-0.397995	1.30627	1.10386	0.281325	0.723116	0.273214	-0.688122	1.23455	0.588656	0.561958	0.8632	-0.151939	-1.11328	0.809397	-0.327361	0.746422	0.8751	0.288906	-0.749456	1.32727	0.57629	0.570142	0.726192	0.370008
P54727	RAD23B	0.267739	0.0180836	0.517393	2.22129	0.0366948	0.23121	0.220466	-0.000829634	0.441761	2.06349	0.0507939	0.46278	0.0493267	-0.200328	0.298982	0.409237	0.686237	0.930987	-0.151699	-0.401354	0.0979555	-1.25857	0.221094	0.495029	0.142394	-0.127264	0.412053	1.09374	0.285647	0.468077	0.187793
P54920	NAPA	-0.323739	-0.652729	0.00525064	-2.0382	0.0534586	0.279871	-0.157998	-0.449617	0.13362	-1.1222	0.273615	0.715585	-0.182765	-0.511755	0.146225	-1.15065	0.261963	0.698568	-0.2236	-0.55259	0.10539	-1.40774	0.172881	0.449237	-0.284717	-0.640067	0.0706325	-1.65955	0.110886	0.283926	0.164326
P55010	EIF5	0.190054	-0.38237	0.762478	0.687689	0.49868	0.726094	-0.23184	-0.73924	0.27556	-0.946394	0.354006	0.776892	-0.274549	-0.846973	0.297875	-0.993427	0.331071	0.750708	0.214065	-0.358359	0.786489	0.774572	0.44666	0.694371	0.0781614	-0.540127	0.69645	0.261839	0.795828	0.880735	0.000145752
P55036	PSMD4	-0.488319	-1.00954	0.0328983	-1.94052	0.0649542	0.287759	0.0732448	-0.388765	0.535255	0.328367	0.745672	0.954502	-0.0505945	-0.571812	0.470623	-0.201056	0.842462	0.967635	0.185256	-0.335962	0.706473	0.736184	0.469228	0.710186	-0.088998	-0.651977	0.473981	-0.327432	0.746369	0.854365	0.614642
P55072	VCP	-0.181775	-0.368486	0.00493565	-2.0165	0.0558429	0.280001	-0.0565658	-0.222067	0.108936	-0.707924	0.486265	0.836282	-0.137919	-0.32463	0.0487918	-1.52999	0.139965	0.62676	-0.174656	-0.361366	0.012055	-1.93752	0.0653391	0.29782	-0.260529	-0.4622	-0.0588588	-2.67576	0.0136536	0.0833075	0.114253
P55209;P55209-2	NAP1L1	-0.505716	-1.64917	0.637735	-0.916058	0.369355	0.638303	-0.210597	-1.22416	0.802965	-0.430363	0.671028	0.92198	-0.526412	-1.66986	0.617039	-0.953547	0.35045	0.758421	-0.135968	-1.27942	1.00748	-0.246293	0.80769	0.901422	-0.204151	-1.43922	1.03092	-0.342369	0.735252	0.845718	0.132263
P55263;P55263-2;P55263-4	ADK	-0.208937	-0.712229	0.294356	-0.859859	0.39894	0.665211	-0.185362	-0.631484	0.260759	-0.860602	0.398539	0.79197	-0.259387	-0.762679	0.243906	-1.06748	0.297079	0.717018	-0.836991	-1.34028	-0.333698	-3.44456	0.00225862	0.0434085	-0.29915	-0.842769	0.244468	-1.1398	0.266364	0.458094	0.334325
P55786	NPEPPS	-0.429729	-1.56294	0.703479	-0.78545	0.440387	0.688254	-0.122562	-1.12704	0.88192	-0.252724	0.802777	0.954502	-0.701614	-1.83482	0.431595	-1.2824	0.212765	0.682215	-0.756553	-1.88976	0.376656	-1.38281	0.1803	0.450433	-1.93533	-3.15934	-0.711329	-3.27496	0.00339246	0.0410624	0.122932
P55957;P55957-2	BID	-0.631746	-1.09741	-0.166079	-2.80996	0.0100702	0.163153	-0.610227	-1.023	-0.197458	-3.06209	0.00561423	0.181697	-0.311589	-0.777256	0.154078	-1.38593	0.179359	0.665122	-0.55253	-1.0182	-0.0868636	-2.45762	0.0221403	0.165936	-0.537143	-1.04012	-0.0341655	-2.21195	0.0374182	0.141712	0.899639
P56537;P56537-2	EIF6	-0.330381	-1.14637	0.485608	-0.838618	0.410509	0.678149	-0.564438	-1.28774	0.158859	-1.61634	0.119963	0.574788	-0.414752	-1.23074	0.401237	-1.05278	0.303622	0.723758	-0.312537	-1.12853	0.503453	-0.793324	0.43588	0.685951	-0.506418	-1.38779	0.374952	-1.1901	0.246417	0.440827	0.108634
P58546	MTPN	-0.352656	-1.33765	0.632335	-0.741571	0.466021	0.700015	-0.335606	-1.20871	0.537495	-0.796157	0.434265	0.813675	0.342097	-0.642894	1.32709	0.719367	0.479324	0.822261	0.402761	-0.582229	1.38775	0.846933	0.405955	0.677253	-0.329015	-1.39293	0.734896	-0.640537	0.528297	0.697861	0.810316
P60174;P60174-1	TPI1	-0.0527757	-0.259546	0.153994	-0.528665	0.602217	0.791359	-0.0719474	-0.255229	0.111334	-0.813072	0.424701	0.804084	-0.0377299	-0.2445	0.16904	-0.377948	0.709013	0.930987	-0.138967	-0.345737	0.0678024	-1.39207	0.177517	0.450433	-0.145418	-0.368755	0.0779188	-1.34863	0.190882	0.385247	0.196782
P60660;P60660-2	MYL6	0.0252869	-0.267048	0.317622	0.179163	0.859414	0.942273	-0.254718	-0.513845	0.00440927	-2.03601	0.0536948	0.477883	-0.137534	-0.429869	0.154801	-0.974458	0.340195	0.753092	-0.310174	-0.602508	-0.0178388	-2.19765	0.0385516	0.21731	-0.288509	-0.604266	0.0272492	-1.89251	0.0713652	0.215305	0.215305
P60709	ACTB	-0.140033	-0.388939	0.108874	-1.16527	0.25612	0.541121	-0.187879	-0.408511	0.0327532	-1.76377	0.0913518	0.555919	-0.197952	-0.446859	0.0509544	-1.64724	0.113411	0.61312	-0.272962	-0.521868	-0.0240551	-2.27143	0.0330226	0.206963	-0.350878	-0.619728	-0.0820284	-2.70321	0.0128346	0.0815916	0.203939
P60842	EIF4A1	-0.25056	-0.545907	0.0447869	-1.75717	0.0924963	0.323843	0.033537	-0.22826	0.295334	0.265334	0.793169	0.954502	-0.211149	-0.506496	0.0841981	-1.48078	0.15254	0.634427	-0.135112	-0.430459	0.160235	-0.947534	0.353438	0.635474	-0.208829	-0.52784	0.110182	-1.35587	0.188599	0.384765	0.337309
P60891	PRPS1	-0.080103	-0.319333	0.159127	-0.693534	0.495076	0.723807	-0.121808	-0.333863	0.090246	-1.18977	0.246545	0.695411	-0.162898	-0.402127	0.076332	-1.41037	0.172112	0.662129	-0.155337	-0.394566	0.083893	-1.34491	0.192062	0.465129	-0.247999	-0.506396	0.010399	-1.9879	0.0591306	0.194014	0.925166
P60900	PSMA6	-0.0773176	-0.292936	0.138301	-0.74272	0.465339	0.700015	-0.0549501	-0.246076	0.136176	-0.595502	0.557454	0.8729	-0.118322	-0.333941	0.0972969	-1.13661	0.267667	0.703243	-0.0801717	-0.29579	0.135447	-0.770137	0.449233	0.696495	-0.187453	-0.420348	0.0454419	-1.66712	0.109358	0.283138	0.157326
P61006	RAB8A	0.296415	-0.865535	1.45836	0.52838	0.602411	0.791359	-0.328164	-1.35812	0.701795	-0.65994	0.515995	0.838434	0.127339	-1.03461	1.28929	0.22699	0.822482	0.958465	-0.173773	-1.33572	0.988177	-0.309762	0.759594	0.88371	0.936329	-0.31872	2.19138	1.54526	0.13624	0.322268	0.45946
P61020	RAB5B	0.0461824	-0.211699	0.304064	0.370928	0.714162	0.850518	0.118865	-0.109723	0.347453	1.07705	0.292877	0.734256	-0.0384866	-0.296369	0.219395	-0.309117	0.760078	0.940715	0.20863	-0.0492522	0.466512	1.67567	0.107652	0.36499	-0.167773	-0.446317	0.110772	-1.24756	0.225028	0.421631	0.203097
P61026	RAB10	-0.402515	-1.01337	0.208336	-1.36484	0.185805	0.45774	-0.225792	-0.767253	0.31567	-0.863723	0.396858	0.79197	-0.168543	-0.779394	0.442308	-0.571491	0.573335	0.872253	-0.437103	-1.04795	0.173748	-1.48211	0.152187	0.424349	-0.117347	-0.777141	0.542447	-0.368381	0.716034	0.831674	0.974218
P61086;P61086-2	UBE2K	-0.390668	-0.919484	0.138148	-1.53016	0.139922	0.384017	0.0733892	-0.395356	0.542134	0.324287	0.748718	0.954502	-0.339269	-0.868084	0.189547	-1.32884	0.197226	0.681674	0.01402	-0.514796	0.542836	0.0549131	0.956693	0.976886	-0.642342	-1.21353	-0.0711561	-2.32928	0.0292046	0.123335	0.821236
P61088	UBE2N	-0.226233	-0.448387	-0.00407923	-2.10929	0.0462696	0.25538	-0.171891	-0.36881	0.0250272	-1.80801	0.0839982	0.543698	-0.166634	-0.388788	0.0555197	-1.55362	0.134236	0.62468	-0.224545	-0.446699	-0.00239087	-2.09355	0.0477822	0.239584	-0.267031	-0.506985	-0.0270778	-2.30499	0.0307558	0.124421	0.391485
P61160;P61160-2	ACTR2	2.59272	0.837624	4.34782	3.05977	0.00564491	0.137172	1.67565	0.119926	3.23138	2.23092	0.0359615	0.407184	0.792173	-0.962926	2.54727	0.934872	0.359784	0.768372	2.03057	0.275475	3.78567	2.39635	0.0252881	0.175774	0.213014	-1.68271	2.10874	0.232738	0.81807	0.890621	0.119226
P61163	ACTR1A	-0.1759	-0.661834	0.310034	-0.749761	0.46117	0.695664	-0.168717	-0.599451	0.262017	-0.811303	0.425695	0.804084	-0.106359	-0.592293	0.379575	-0.453347	0.654643	0.912933	-0.372671	-0.858605	0.113263	-1.58848	0.126138	0.389994	-0.169295	-0.694163	0.355573	-0.668079	0.510882	0.684114	0.0917859
P61201;P61201-2	COPS2	-0.283414	-0.823758	0.256929	-1.08639	0.288814	0.573563	-0.0875288	-0.566492	0.391435	-0.378514	0.708598	0.94657	-0.213509	-0.753852	0.326835	-0.818425	0.421702	0.802812	-0.271126	-0.811469	0.269218	-1.03928	0.309718	0.599078	-0.295825	-0.879463	0.287813	-1.04984	0.304941	0.489859	0.499209
P61204;P84077	ARF1;ARF3	-0.238247	-0.436205	-0.0402885	-2.4928	0.0205012	0.213054	-0.186735	-0.362206	-0.0112634	-2.20421	0.0380278	0.407184	-0.147563	-0.345521	0.0503951	-1.54397	0.136552	0.62676	-0.300147	-0.498105	-0.102188	-3.14046	0.00466848	0.0651757	-0.284721	-0.49854	-0.0709017	-2.75808	0.0113347	0.0767134	0.0794654
P61221	ABCE1	-0.266058	-1.23734	0.70522	-0.56737	0.576083	0.77537	0.392987	-0.467959	1.25393	0.945444	0.35448	0.776892	-0.774024	-1.7453	0.197255	-1.65061	0.112716	0.61312	-0.342449	-1.31373	0.62883	-0.730274	0.472762	0.71315	-0.371965	-1.42107	0.677136	-0.734376	0.470308	0.648952	0.937562
P61224	RAP1B	-0.19822	-0.477453	0.0810128	-1.47033	0.155325	0.408087	-0.102702	-0.350216	0.144811	-0.859439	0.399167	0.79197	0.000572518	-0.27866	0.279805	0.00424674	0.996649	0.998051	-0.217249	-0.496482	0.0619834	-1.61148	0.121021	0.384674	-0.286742	-0.588348	0.0148635	-1.96918	0.0613738	0.196839	0.790726
P61960	UFM1	-0.0347964	-0.636736	0.567143	-0.119733	0.905758	0.962325	0.316401	-0.217161	0.849964	1.22825	0.232052	0.684266	-0.0221994	-0.624139	0.57974	-0.0763874	0.939786	0.98606	0.105394	-0.496546	0.707333	0.362656	0.720248	0.868121	-0.24897	-0.899139	0.4012	-0.793147	0.43598	0.614642	0.682563
P61970	NUTF2	-0.125594	-0.440505	0.189317	-0.826065	0.417445	0.682091	0.0398193	-0.239319	0.318958	0.295466	0.770348	0.954502	-0.0895008	-0.404412	0.22541	-0.588671	0.561948	0.8632	0.040208	-0.274703	0.355119	0.264459	0.793835	0.895737	-0.166226	-0.506368	0.173917	-1.01221	0.322204	0.50199	0.297483
P61981	YWHAG	-0.106221	-0.453233	0.240791	-0.634015	0.532467	0.750726	-0.0330618	-0.340655	0.274532	-0.22263	0.825833	0.954502	0.196794	-0.150219	0.543806	1.17463	0.252432	0.690446	0.00905482	-0.337957	0.356067	0.0540466	0.957375	0.976886	-0.274049	-0.648865	0.100767	-1.51441	0.143851	0.330393	0.300671
P62158	CALM1;CALM2;CALM3	-0.204458	-0.483425	0.0745088	-1.51805	0.142935	0.386958	0.114051	-0.133226	0.361329	0.95532	0.349572	0.776892	-0.0143688	-0.293336	0.264598	-0.106685	0.915985	0.976299	-0.484312	-0.763279	-0.205345	-3.59589	0.0015659	0.0381291	-0.159074	-0.460393	0.142244	-1.09347	0.285761	0.468077	0.247737
P62191	PSMC1	0.327403	-0.140379	0.795185	1.44968	0.16095	0.418236	-0.182715	-0.597359	0.23193	-0.912706	0.371078	0.784928	-0.0913566	-0.559139	0.376425	-0.404511	0.689658	0.930987	-0.199419	-0.667201	0.268363	-0.882993	0.386581	0.660361	-0.269532	-0.774794	0.23573	-1.10491	0.280879	0.465084	0.806715
P62195;P62195-2	PSMC5	-0.310723	-0.56977	-0.051676	-2.48444	0.0208801	0.213054	-0.0774789	-0.3071	0.152142	-0.698886	0.491788	0.837687	-0.226978	-0.486025	0.0320688	-1.81484	0.0829091	0.599783	-0.35849	-0.617537	-0.0994431	-2.86637	0.00884793	0.0954505	-0.372174	-0.651977	-0.0923713	-2.75504	0.0114132	0.0767134	0.0184102
P62258	YWHAE	-0.219048	-0.407248	-0.0308474	-2.41075	0.0245133	0.213054	-0.116858	-0.28368	0.0499636	-1.45091	0.160611	0.592514	-0.196648	-0.384849	-0.00844804	-2.16423	0.0413218	0.51616	-0.287262	-0.475463	-0.0990618	-3.16149	0.00444216	0.0645473	-0.319085	-0.522364	-0.115805	-3.25121	0.00359005	0.0410624	0.219805
P62328	TMSB4X	-0.0404851	-0.572953	0.491982	-0.157484	0.876269	0.951072	-0.329221	-0.801203	0.142761	-1.44476	0.162315	0.595712	-0.225364	-0.757831	0.307104	-0.876647	0.389947	0.78209	-0.486843	-1.01931	0.0456247	-1.89378	0.0711889	0.310522	-0.561531	-1.13666	0.0135995	-2.02228	0.0551991	0.183653	0.0512508
P62333	PSMC6	-0.259555	-0.475315	-0.0437946	-2.49168	0.0205517	0.213054	-0.322074	-0.513325	-0.130823	-3.48807	0.00203342	0.135526	-0.252342	-0.468103	-0.036582	-2.42244	0.0239006	0.429673	-0.31873	-0.534491	-0.10297	-3.05975	0.00564516	0.0744325	-0.280904	-0.513952	-0.0478567	-2.49659	0.0203314	0.106223	0.433437
P62805	HIST1H4A;HIST1H4B;HIST1H4C;HIST1H4D;HIST1H4E;HIST1H4F;HIST1H4H;HIST1H4I;HIST1H4J;HIST1H4K;HIST1H4L;HIST2H4A;HIST2H4B;HIST4H4	-0.111026	-0.675445	0.453393	-0.407432	0.687543	0.839663	-0.0791223	-0.579426	0.421182	-0.327566	0.74627	0.954502	-0.190484	-0.754903	0.373935	-0.699021	0.491705	0.825694	-0.288394	-0.852814	0.276025	-1.05832	0.301143	0.595593	-0.212788	-0.82243	0.396854	-0.722945	0.477165	0.655142	0.0433049
P62820	RAB1A	-0.177771	-0.575023	0.219481	-0.926891	0.363824	0.631811	-0.111318	-0.463444	0.240808	-0.654788	0.519246	0.838434	-0.196933	-0.594185	0.200319	-1.0268	0.315433	0.733949	-0.0383304	-0.435583	0.358922	-0.199853	0.843391	0.926689	-0.505529	-0.93461	-0.0764475	-2.44028	0.0229921	0.113683	0.174269
P62826	RAN	-0.363131	-0.597463	-0.1288	-3.20972	0.00396238	0.137172	-0.184334	-0.392046	0.0233789	-1.83813	0.0792894	0.532586	-0.167422	-0.401753	0.06691	-1.47984	0.152789	0.634427	-0.131708	-0.36604	0.102623	-1.16417	0.256557	0.541878	-0.293437	-0.546544	-0.0403304	-2.40129	0.0250198	0.117974	0.0191189
P62877	RBX1	-0.537873	-1.07268	-0.00306636	-2.08313	0.0488072	0.265231	0.11482	-0.359235	0.588876	0.501676	0.620771	0.905716	-0.0637569	-0.598564	0.47105	-0.246924	0.807207	0.954777	-0.345532	-0.880339	0.189275	-1.33821	0.194201	0.468715	-0.17725	-0.754907	0.400407	-0.63555	0.531484	0.699476	0.604331
P62937	PPIA	-0.217782	-0.462016	0.0264509	-1.84693	0.0779563	0.306657	-0.090728	-0.307218	0.125762	-0.868036	0.394543	0.79197	-0.22229	-0.466524	0.021943	-1.88516	0.0723935	0.599783	-0.179257	-0.42349	0.0649765	-1.52021	0.142393	0.406095	-0.335878	-0.599681	-0.0720763	-2.63717	0.0148889	0.0876107	0.0818211
P62942	FKBP1A	-0.475485	-1.0563	0.105332	-1.69563	0.103758	0.333808	-0.572115	-1.08695	-0.0572757	-2.30168	0.0309726	0.407184	-0.190211	-0.771029	0.390606	-0.678313	0.504493	0.836726	-0.398413	-0.97923	0.182405	-1.42078	0.169097	0.446839	-0.452814	-1.08017	0.17454	-1.495	0.148815	0.33637	0.275103
P63000	RAC1	-0.23845	-0.854577	0.377677	-0.801606	0.431169	0.688254	-0.347483	-0.893621	0.198655	-1.31785	0.200821	0.659082	-0.366702	-0.982829	0.249424	-1.23276	0.230398	0.682215	-0.453039	-1.06917	0.163088	-1.523	0.141698	0.406095	-0.445444	-1.11094	0.220049	-1.38638	0.179221	0.373115	0.726192
P63104	YWHAZ	-0.1637	-0.412502	0.0851016	-1.36279	0.186439	0.45774	-0.164079	-0.384618	0.0564603	-1.54099	0.137272	0.581747	-0.191067	-0.439869	0.0577349	-1.59062	0.125656	0.620476	-0.230495	-0.479297	0.0183071	-1.91885	0.0677826	0.303529	-0.228141	-0.496878	0.0405957	-1.75837	0.0922872	0.252725	0.468077
P63208	SKP1	-0.232571	-0.540382	0.0752406	-1.56496	0.131555	0.369631	-0.0308804	-0.303726	0.241965	-0.234423	0.816778	0.954502	0.0138119	-0.294	0.321623	0.09294	0.926774	0.981939	-0.263027	-0.570839	0.0447846	-1.7699	0.0903014	0.334868	-0.222845	-0.55532	0.109629	-1.38829	0.178649	0.373115	0.283926
P63241	EIF5A	-0.247069	-0.543443	0.049306	-1.72667	0.0979388	0.327953	0.0665941	-0.196114	0.329302	0.525044	0.60469	0.893236	0.064806	-0.231569	0.361181	0.452906	0.654955	0.912933	0.035944	-0.260431	0.332319	0.2512	0.803941	0.901422	-0.193794	-0.513915	0.126327	-1.25389	0.22276	0.421631	0.880735
P67775	PPP2CA	0.339937	-0.00496172	0.684836	2.04146	0.0531083	0.279871	0.315996	0.0102755	0.621716	2.14087	0.0433639	0.425197	0.209335	-0.135563	0.554234	1.25714	0.221601	0.682215	0.126844	-0.218055	0.471743	0.761749	0.454124	0.698351	0.0703813	-0.302152	0.442915	0.391315	0.699247	0.821236	0.854365
P67936	TPM4	-0.187572	-0.565612	0.190468	-1.0277	0.31502	0.585206	-0.229849	-0.564945	0.105247	-1.42071	0.169117	0.608137	-0.102904	-0.480944	0.275136	-0.563804	0.578467	0.874108	-0.327366	-0.705406	0.0506739	-1.79362	0.0863329	0.330043	-0.40223	-0.81056	0.00609957	-2.04032	0.0532309	0.178775	0.0833075
P68032;P68133	ACTA1;ACTC1	-0.153028	-0.462661	0.156605	-1.02366	0.31688	0.585206	-0.206744	-0.481204	0.0677163	-1.56022	0.132669	0.574788	-0.249183	-0.558816	0.0604502	-1.66688	0.109406	0.61312	-0.405618	-0.715251	-0.0959853	-2.71334	0.0125444	0.120698	-0.54713	-0.881572	-0.212689	-3.38847	0.00258508	0.0360898	0.845718
P68036	UBE2L3	-0.0215363	-0.41942	0.376347	-0.112111	0.91173	0.962325	0.0270838	-0.325602	0.37977	0.159058	0.875043	0.974292	0.0128803	-0.385003	0.410764	0.0670509	0.947134	0.988797	-0.131155	-0.529039	0.266728	-0.682753	0.501736	0.729053	-0.040894	-0.470657	0.388869	-0.19709	0.845528	0.909389	0.458094
P68036;P68036-3	UBE2L3	0.105202	-0.581449	0.791853	0.317338	0.753915	0.878539	0.0539855	-0.554665	0.662637	0.183714	0.855884	0.963865	-0.112653	-0.799304	0.573997	-0.339815	0.737149	0.931808	-0.204171	-0.890822	0.48248	-0.615873	0.544162	0.765781	0.23416	-0.507508	0.975827	0.653937	0.519783	0.691423	0.0410624
P68104;P68104-2;Q5VTE0	EEF1A1	-0.682964	-1.33575	-0.0301822	-2.16702	0.0410837	0.237818	0.243415	-0.335214	0.822044	0.871325	0.392783	0.79197	-0.62171	-1.27449	0.0310714	-1.97267	0.0609505	0.568163	-1.18958	-1.84236	-0.536801	-3.77451	0.00101306	0.0327594	0.271909	-0.433176	0.976994	0.79876	0.432785	0.612056	0.141712
P68363	TUBA1B	0.198153	-0.254223	0.650529	0.907267	0.373885	0.642268	0.0373926	-0.363596	0.438381	0.193147	0.848578	0.963616	-0.379129	-0.831505	0.0732473	-1.73588	0.0962668	0.61312	-0.317094	-0.76947	0.135282	-1.45185	0.160352	0.435764	0.0618939	-0.426728	0.550516	0.262366	0.795427	0.880735	0.440827
P68366;P68366-2	TUBA4A	-0.651952	-1.70871	0.404803	-1.27784	0.21434	0.489134	-0.0980989	-1.03481	0.838614	-0.216916	0.83023	0.954502	-0.496439	-1.55319	0.560316	-0.973028	0.340889	0.753092	0.406857	-0.649898	1.46361	0.797446	0.433531	0.685951	-0.277825	-1.41925	0.863601	-0.504146	0.619062	0.773284	0.697861
P68400;Q8NEV1	CSNK2A1;CSNK2A3	0.482218	-0.294633	1.25907	1.2857	0.211629	0.487637	0.330218	-0.358386	1.01882	0.993264	0.331148	0.77019	0.632554	-0.144297	1.40941	1.68653	0.105518	0.61312	-0.0223539	-0.799205	0.754497	-0.0596003	0.953	0.976886	-0.482589	-1.32168	0.356506	-1.19124	0.245979	0.440827	0.385247
P68431;P84243;Q16695;Q71DI3	H3F3A;H3F3B;HIST1H3A;HIST1H3B;HIST1H3C;HIST1H3D;HIST1H3E;HIST1H3F;HIST1H3G;HIST1H3H;HIST1H3I;HIST1H3J;HIST2H3A;HIST2H3C;HIST2H3D;HIST3H3	0.529658	-0.0822302	1.14155	1.7929	0.0864498	0.322015	0.430484	-0.111897	0.972866	1.64394	0.114096	0.574788	0.260634	-0.351255	0.872522	0.882251	0.386974	0.78209	0.89707	0.285182	1.50896	3.0366	0.00595972	0.0744442	0.73729	0.0763747	1.39821	2.31061	0.0303904	0.124421	0.215305
P68871	HBB	0.0556555	-0.168854	0.280165	0.513459	0.612638	0.797839	0.0459949	-0.153012	0.245002	0.478714	0.636763	0.909956	0.0170979	-0.207412	0.241608	0.15774	0.87607	0.974667	-0.0472151	-0.271725	0.177295	-0.435591	0.667286	0.837932	-0.123717	-0.366216	0.118781	-1.05671	0.301864	0.488472	0.0815916
P69891	HBG1	-0.0839283	-0.298782	0.130926	-0.809094	0.426938	0.688254	0.0509827	-0.139465	0.24143	0.554474	0.584727	0.885799	-0.069009	-0.283863	0.145845	-0.665267	0.512645	0.838928	-0.19446	-0.409314	0.020394	-1.87465	0.0738877	0.311457	-0.354156	-0.586224	-0.122087	-3.1609	0.00444829	0.0433049	0.384765
P69892	HBG2	-0.275575	-0.526142	-0.0250094	-2.27799	0.0325676	0.227335	-0.0473706	-0.269474	0.174732	-0.441762	0.66288	0.915792	-0.131275	-0.381841	0.119291	-1.08516	0.289346	0.715548	-0.26766	-0.518226	-0.0170935	-2.21256	0.0373708	0.212945	-0.384954	-0.655596	-0.114312	-2.9461	0.00735921	0.0575798	0.194014
P69905	HBA1;HBA2	0.0449991	-0.191912	0.28191	0.393416	0.697717	0.844009	0.0469573	-0.163042	0.256956	0.463148	0.647709	0.909956	0.00427478	-0.232636	0.241186	0.0373734	0.970517	0.990977	-0.0748321	-0.311743	0.162079	-0.65424	0.519592	0.744681	-0.150634	-0.406527	0.105259	-1.21926	0.235379	0.430368	0.283138
P78371	CCT2	-0.0612095	-0.260587	0.138168	-0.635882	0.531271	0.750526	0.128469	-0.0482598	0.305199	1.50565	0.146073	0.581747	0.120956	-0.0784219	0.320333	1.25656	0.221808	0.682215	-0.042374	-0.241751	0.157003	-0.440207	0.663989	0.83664	-0.00705641	-0.222409	0.208296	-0.0678685	0.94649	0.968248	0.322268
P78417	GSTO1	-0.00442657	-0.196753	0.1879	-0.0476719	0.962399	0.986123	-0.102897	-0.273376	0.0675817	-1.25016	0.224092	0.684266	-0.0802177	-0.272544	0.112108	-0.863904	0.396761	0.786611	-0.0668873	-0.259213	0.125439	-0.720343	0.478735	0.717598	-0.0989998	-0.306736	0.108736	-0.987089	0.3341	0.517129	0.421631
P80108	GPLD1	0.523815	-0.0294845	1.07711	1.96088	0.0623924	0.287759	0.479344	-0.0111037	0.969792	2.02436	0.0549684	0.483179	0.314049	-0.23925	0.867349	1.17563	0.252038	0.690446	0.563679	0.0103792	1.11698	2.11011	0.0461919	0.236609	1.25444	0.656808	1.85207	4.3476	0.000247237	0.0077322	0.831674
P80748	IGLV3-21	0.248087	-0.0426471	0.538821	1.76743	0.0907242	0.323843	0.0957307	-0.161978	0.353439	0.769407	0.449657	0.825172	0.0187828	-0.271951	0.309517	0.133813	0.894741	0.974667	-0.192848	-0.483582	0.0978861	-1.37389	0.183015	0.455617	0.172844	-0.141185	0.486873	1.14003	0.266269	0.458094	0.123335
P81605	DCD	1.49062	0.623603	2.35764	3.56101	0.00170426	0.108833	1.00967	0.241145	1.7782	2.72116	0.0123244	0.274412	0.874024	0.00700738	1.74104	2.088	0.0483261	0.53385	0.595221	-0.271796	1.46224	1.42195	0.168762	0.446839	0.560217	-0.376268	1.4967	1.23905	0.228102	0.422939	0.124421
Q00013	MPP1	-0.181563	-0.404483	0.0413568	-1.68699	0.105429	0.336615	0.0568624	-0.140735	0.25446	0.596043	0.557098	0.8729	-0.012251	-0.235171	0.210669	-0.11383	0.910382	0.974667	0.0182905	-0.204629	0.24121	0.169946	0.866572	0.937689	-0.0684807	-0.309262	0.1723	-0.589087	0.561674	0.721859	0.890621
Q00169	PITPNA	-0.255282	-0.563607	0.0530426	-1.71493	0.100107	0.327953	-0.25295	-0.526251	0.0203504	-1.91703	0.0680254	0.511515	-0.128238	-0.436563	0.180087	-0.861474	0.398069	0.786611	-0.401603	-0.709928	-0.0932783	-2.69788	0.0129901	0.120839	-0.505365	-0.838394	-0.172336	-3.14309	0.00463959	0.0433049	0.684114
Q00577	PURA	0.11417	-0.500843	0.729183	0.384504	0.704217	0.844009	0.180156	-0.364995	0.725306	0.684486	0.500662	0.838434	-0.187394	-0.802407	0.427619	-0.631111	0.53433	0.857771	-0.476177	-1.09119	0.138836	-1.60368	0.122737	0.388395	0.235598	-0.428692	0.899888	0.734594	0.470177	0.648952	0.489859
Q00610;Q00610-2	CLTC	-0.200148	-0.472067	0.0717721	-1.52456	0.14131	0.384017	-0.0378096	-0.278841	0.203221	-0.32491	0.748252	0.954502	-0.128549	-0.400469	0.14337	-0.979181	0.337907	0.753092	-0.284734	-0.556653	-0.012814	-2.16886	0.0409275	0.221819	-0.231779	-0.525486	0.0619277	-1.63453	0.116068	0.288839	0.0767134
Q00796	SORD	-0.0452806	-0.335893	0.245332	-0.322724	0.749885	0.878101	-0.0393453	-0.296946	0.218255	-0.316359	0.754647	0.954502	-0.0235075	-0.31412	0.267105	-0.167543	0.86844	0.974667	-0.0709986	-0.361611	0.219614	-0.506022	0.617765	0.81278	-0.0515726	-0.36547	0.262325	-0.340302	0.736787	0.846117	0.0767134
Q01432;Q01432-4;Q01432-5;Q01432-6	AMPD3	-0.171285	-1.08196	0.739387	-0.389574	0.700516	0.844009	-0.259525	-1.06675	0.547699	-0.665915	0.512238	0.838434	-0.000830647	-0.911502	0.909841	-0.00188925	0.998509	0.998509	-0.37042	-1.28109	0.540251	-0.842494	0.408382	0.677781	-0.225774	-1.20941	0.757863	-0.475416	0.639076	0.784521	0.648952
Q01469	FABP5	-0.0182183	-0.359794	0.323358	-0.110473	0.913014	0.962325	-0.0417484	-0.344523	0.261026	-0.285597	0.777801	0.954502	0.122234	-0.219342	0.46381	0.741208	0.466237	0.820044	0.415426	0.0738504	0.757002	2.51907	0.0193515	0.148751	0.0169641	-0.35198	0.385908	0.0952366	0.92497	0.953081	0.196839
Q01518	CAP1	-0.0919558	-0.406851	0.222939	-0.604849	0.551334	0.760763	-0.0874742	-0.366599	0.19165	-0.649106	0.522844	0.838434	0.0425906	-0.272304	0.357486	0.280144	0.781927	0.948326	-0.397342	-0.712237	-0.0824468	-2.61356	0.0156954	0.135746	-0.272219	-0.612344	0.0679066	-1.65773	0.111258	0.283926	0.614642
Q02985;Q92496	CFHR3;CFHR4	1.01841	0.253752	1.78306	2.7586	0.0113212	0.179126	0.0917229	-0.586072	0.769518	0.280293	0.781814	0.954502	0.48615	-0.278506	1.25081	1.31686	0.201149	0.68199	-0.128631	-0.893287	0.636025	-0.348429	0.730759	0.871145	0.236262	-0.589661	1.06218	0.592499	0.559427	0.720818	0.50199
Q03591	CFHR1	0.316937	-0.298767	0.932642	1.06619	0.29765	0.577587	-0.155558	-0.701322	0.390206	-0.590366	0.560831	0.8729	0.257561	-0.358144	0.873266	0.866446	0.395396	0.786611	0.277432	-0.338273	0.893136	0.933291	0.360582	0.641739	0.366531	-0.298507	1.03157	1.14156	0.265647	0.458094	0.330393
Q04756	HGFAC	0.0994203	-0.545127	0.743968	0.319488	0.752306	0.878101	0.622916	0.0515854	1.19425	2.25827	0.0339524	0.407184	0.812345	0.167798	1.45689	2.61047	0.0158038	0.401974	1.46677	0.822227	2.11132	4.71349	0.000100256	0.00648928	1.18057	0.48438	1.87676	3.51235	0.0019175	0.0278624	0.468077
Q04760	GLO1	-0.00480915	-0.247074	0.237456	-0.0411161	0.967566	0.987817	0.0777181	-0.137027	0.292463	0.749606	0.461262	0.825172	-0.0917734	-0.334038	0.150491	-0.784621	0.440863	0.815309	0.039791	-0.202474	0.282056	0.340195	0.736866	0.87296	-0.204217	-0.465893	0.0574587	-1.61645	0.119939	0.292454	0.468077
Q06033;Q06033-2	ITIH3	0.44183	-0.14343	1.02709	1.56365	0.131863	0.369631	-0.181974	-0.700751	0.336804	-0.726543	0.475001	0.829808	0.215435	-0.369825	0.800695	0.762432	0.453725	0.819986	0.365177	-0.220083	0.950437	1.29237	0.209349	0.488711	0.0153477	-0.616806	0.647501	0.0502869	0.960338	0.974218	0.468077
Q06124;Q06124-2	PTPN11	-0.186474	-0.654198	0.28125	-0.825778	0.417604	0.682091	0.107498	-0.307095	0.52209	0.537045	0.596511	0.893236	-0.0281085	-0.495832	0.439615	-0.124475	0.902045	0.974667	-0.0665626	-0.534286	0.401161	-0.294764	0.770878	0.888131	-0.551358	-1.05656	-0.0461591	-2.2605	0.033793	0.131479	0.465084
Q06323	PSME1	-0.00549075	-0.238625	0.227644	-0.0487819	0.961524	0.986123	0.0665577	-0.140094	0.273209	0.667103	0.511493	0.838434	-0.143253	-0.376387	0.0898817	-1.27271	0.21612	0.682215	-0.0642263	-0.297361	0.168908	-0.570611	0.573921	0.785817	-0.147361	-0.399175	0.104453	-1.21209	0.238058	0.432391	0.0767134
Q06830	PRDX1	-0.0134106	-0.212952	0.186131	-0.139203	0.890529	0.957913	-0.0275986	-0.204473	0.149276	-0.323189	0.749538	0.954502	-0.11541	-0.314951	0.0841315	-1.19796	0.243404	0.68884	-0.0858021	-0.285343	0.113739	-0.890633	0.382555	0.659022	-0.139441	-0.35497	0.0760884	-1.34004	0.193615	0.387222	0.0410624
Q07960	ARHGAP1	-0.53595	-1.18531	0.113409	-1.70952	0.10112	0.328754	-0.454068	-1.02966	0.121527	-1.63395	0.116193	0.574788	-0.29994	-0.949299	0.349418	-0.956718	0.348882	0.758421	-0.276174	-0.925532	0.373185	-0.88091	0.387684	0.660361	-1.37354	-2.07492	-0.67215	-4.05617	0.000507339	0.012069	0.183653
Q08380	LGALS3BP	-0.24331	-1.02723	0.540606	-0.642871	0.526808	0.748678	-0.176622	-0.871489	0.518246	-0.526472	0.603714	0.893236	0.132088	-0.651829	0.916004	0.349001	0.730335	0.931808	-0.870501	-1.65442	-0.0865842	-2.30003	0.0310816	0.201183	0.571749	-0.274978	1.41848	1.39861	0.17557	0.370008	0.106223
Q08495	DMTN	0.0814073	-0.24971	0.412525	0.509231	0.615551	0.797839	0.140463	-0.153042	0.433967	0.991242	0.332113	0.77019	-0.00659479	-0.337713	0.324523	-0.0412527	0.967458	0.990977	0.236276	-0.0948413	0.567394	1.47799	0.153279	0.424649	0.231223	-0.126425	0.588871	1.33909	0.19392	0.387222	0.655142
Q08495-2	DMTN	-0.113163	-0.330505	0.10418	-1.07843	0.292273	0.573563	-0.139388	-0.332041	0.0532659	-1.49858	0.147888	0.581747	-0.174337	-0.39168	0.0430052	-1.66142	0.110507	0.61312	-0.202488	-0.41983	0.0148546	-1.92969	0.0663543	0.299014	-0.28763	-0.522386	-0.0528732	-2.53776	0.0185707	0.100009	0.655142
Q08722;Q08722-2;Q08722-3;Q08722-4	CD47	0.335675	-0.271161	0.942511	1.14573	0.263953	0.551128	0.0902952	-0.447608	0.628198	0.347692	0.731305	0.951668	0.307371	-0.299465	0.914208	1.04912	0.305266	0.724498	0.259463	-0.347373	0.866299	0.8856	0.385205	0.660361	0.0488858	-0.606572	0.704344	0.15448	0.878609	0.92677	0.655142
Q12860;Q12860-2;Q12860-3	CNTN1	-0.121865	-0.490592	0.246861	-0.684556	0.500618	0.727429	-0.198524	-0.525366	0.128317	-1.25809	0.221266	0.684266	-0.199204	-0.56793	0.169523	-1.11899	0.274954	0.709301	-0.167317	-0.536043	0.20141	-0.93987	0.35727	0.637731	-0.144806	-0.543076	0.253465	-0.75308	0.459213	0.641097	0.655142
Q12912;Q12912-2	LRMP	0.80815	-0.8677	2.484	0.998828	0.328504	0.596671	-0.191909	-1.67739	1.29357	-0.267586	0.791457	0.954502	-0.816315	-2.49217	0.859535	-1.00892	0.323746	0.736888	2.16942	0.49357	3.84527	2.68128	0.0134852	0.120985	-0.26452	-2.07464	1.54561	-0.302679	0.764916	0.868613	0.655142
Q13057;Q13057-2	COASY	-0.163692	-0.496385	0.169	-1.01911	0.318991	0.585364	0.0487659	-0.246134	0.343666	0.342511	0.735147	0.951668	-0.221287	-0.553979	0.111405	-1.37767	0.18186	0.66648	-0.0864342	-0.419126	0.246258	-0.538117	0.595782	0.800372	-0.0793231	-0.438672	0.280026	-0.457212	0.651905	0.790726	0.655142
Q13098;Q13098-5;Q13098-7	GPS1	-0.124286	-0.360338	0.111767	-1.09055	0.287017	0.573563	0.0458117	-0.163426	0.25505	0.453491	0.65454	0.912139	0.0405602	-0.195492	0.276612	0.355898	0.725234	0.930987	0.169425	-0.0666273	0.405477	1.48663	0.150998	0.423271	0.0261097	-0.228856	0.281075	0.212106	0.833935	0.899639	0.655142
Q13126;Q13126-2;Q13126-3;Q13126-4	MTAP	0.212338	-0.152054	0.576729	1.20696	0.23999	0.525764	0.531744	0.208745	0.854743	3.40985	0.00245555	0.135526	0.0219733	-0.342419	0.386365	0.1249	0.901713	0.974667	0.389219	0.0248268	0.75361	2.21237	0.037385	0.212945	-0.0729267	-0.466515	0.320662	-0.383776	0.704748	0.823942	0.655142
Q13200	PSMD2	-0.0952987	-0.272446	0.0818488	-1.11426	0.276935	0.560164	-0.0140778	-0.171102	0.142947	-0.185696	0.854348	0.963865	-0.206179	-0.383327	-0.0290316	-2.4107	0.0245159	0.429673	-0.141941	-0.319089	0.0352063	-1.65961	0.110873	0.3718	-0.199229	-0.39057	-0.00788755	-2.15664	0.0419759	0.150185	0.655142
Q13228;Q13228-4	SELENBP1	-0.0706835	-0.273916	0.132548	-0.720377	0.478714	0.711575	0.151805	-0.0283407	0.331951	1.7454	0.0945643	0.561082	0.0723098	-0.130922	0.275542	0.736951	0.468771	0.820044	-0.0827453	-0.285977	0.120487	-0.843305	0.407938	0.677781	-0.0950432	-0.314559	0.124472	-0.896786	0.379332	0.560882	0.655142
Q13404	UBE2V1	-0.102546	-0.319268	0.114176	-0.980056	0.337484	0.603741	-0.0423471	-0.23445	0.149756	-0.456586	0.652348	0.912139	-0.0796784	-0.2964	0.137043	-0.761504	0.454268	0.819986	-0.0699783	-0.2867	0.146743	-0.668797	0.510432	0.737176	-0.177041	-0.411128	0.057045	-1.56651	0.131193	0.312407	0.655142
Q13526	PIN1	0.0437095	-0.312294	0.399713	0.254305	0.801571	0.907366	0.272559	-0.0430047	0.588123	1.78899	0.0870956	0.55439	0.0582811	-0.297723	0.414285	0.339084	0.737692	0.931808	0.137121	-0.218883	0.493124	0.797777	0.433343	0.685951	-0.0248605	-0.409389	0.359668	-0.133911	0.894664	0.932934	0.655142
Q13616	CUL1	0.436504	-0.22988	1.10289	1.35674	0.188326	0.459104	0.0956306	-0.495056	0.686317	0.335331	0.740483	0.951668	0.0627828	-0.603601	0.729167	0.195142	0.847034	0.968039	0.0482408	-0.618143	0.714625	0.149942	0.882147	0.944494	-0.490198	-1.20998	0.229579	-1.41061	0.172042	0.370008	0.655142
Q13617;Q13617-2	CUL2	0.0807865	-0.356106	0.517679	0.382999	0.705317	0.844009	-0.0837409	-0.471005	0.303523	-0.447883	0.658522	0.913973	-0.0350977	-0.47199	0.401795	-0.166394	0.869334	0.974667	0.0522781	-0.384615	0.489171	0.247844	0.806504	0.901422	-0.277569	-0.749467	0.19433	-1.2183	0.235735	0.430368	0.655142
Q13630	TSTA3	-0.119569	-0.351885	0.112747	-1.06604	0.297717	0.577587	0.0388381	-0.167088	0.244764	0.390643	0.699737	0.938253	0.0545369	-0.177779	0.286853	0.486233	0.631506	0.904693	0.0366888	-0.195627	0.269005	0.327106	0.746613	0.8751	-0.264534	-0.515465	-0.0136044	-2.18355	0.039699	0.144213	0.113683
Q13867	BLMH	-0.270237	-0.700089	0.159615	-1.30215	0.206046	0.479426	-0.195933	-0.576956	0.18509	-1.0651	0.298134	0.736065	-0.326925	-0.756777	0.102927	-1.5753	0.129151	0.620476	-0.116872	-0.546724	0.312979	-0.563154	0.578902	0.787969	-0.56826	-1.03255	-0.103967	-2.53506	0.0186815	0.100009	0.117974
Q14203;Q14203-2;Q14203-3;Q14203-4;Q14203-5;Q14203-6	DCTN1	-0.0779254	-0.621485	0.465635	-0.296938	0.769239	0.889354	0.0812823	-0.400532	0.563097	0.349422	0.730023	0.951668	-0.129798	-0.673358	0.413762	-0.4946	0.62568	0.903619	0.0727351	-0.470825	0.616295	0.27716	0.784189	0.893611	-0.372316	-0.959428	0.214796	-1.31348	0.202263	0.400031	0.699476
Q14204	DYNC1H1	-0.0208329	-0.677594	0.635928	-0.0657015	0.948196	0.977046	-0.490717	-1.07287	0.0914399	-1.74592	0.0944726	0.561082	-0.572777	-1.22954	0.0839844	-1.80639	0.0842583	0.599783	-1.32514	-1.98191	-0.668383	-4.17916	0.000374666	0.0177841	-0.803833	-1.51322	-0.0944499	-2.34703	0.0281174	0.122819	0.0876107
Q14254	FLOT2	-0.338763	-0.665551	-0.0119752	-2.14716	0.0428057	0.244866	0.00193469	-0.287732	0.291601	0.0138339	0.989084	0.993462	-0.170319	-0.497107	0.156469	-1.07952	0.291798	0.717018	0.0245076	-0.30228	0.351296	0.155335	0.877943	0.941491	-0.569042	-0.922014	-0.216071	-3.33917	0.0029097	0.0390888	0.33637
Q14289;Q14289-2	PTK2B	0.160972	-0.280596	0.60254	0.755069	0.458043	0.695365	-0.0606059	-0.452014	0.330802	-0.320715	0.751388	0.954502	-0.16154	-0.603108	0.280028	-0.757734	0.456477	0.820044	-0.16391	-0.605478	0.277658	-0.768848	0.449983	0.696495	-0.165482	-0.64243	0.311466	-0.718645	0.47976	0.656902	0.373115
Q14624	ITIH4	0.543487	0.187648	0.899326	3.16351	0.00442095	0.137172	0.195354	-0.120064	0.510771	1.28283	0.212614	0.680814	0.338203	-0.0176359	0.694042	1.9686	0.0614446	0.568163	0.647725	0.291886	1.00356	3.77025	0.00102366	0.0327594	0.547037	0.162687	0.931387	2.94797	0.00732721	0.0575798	0.252725
Q14847	LASP1	-0.0527087	-0.337443	0.232025	-0.383422	0.705007	0.844009	-0.0631307	-0.31552	0.189259	-0.518087	0.609457	0.896557	-0.176831	-0.461565	0.107903	-1.28633	0.211412	0.682215	-0.182769	-0.467503	0.101965	-1.32953	0.197003	0.470402	-0.223349	-0.530897	0.0841989	-1.5042	0.146445	0.334196	0.373115
Q14974	KPNB1	0.0798271	-0.225186	0.38484	0.542083	0.593092	0.783454	-0.00559081	-0.275956	0.264774	-0.0428309	0.966214	0.993462	-0.0526654	-0.357678	0.252348	-0.357635	0.723951	0.930987	-0.223427	-0.52844	0.0815861	-1.51723	0.143141	0.406095	-0.0295033	-0.358955	0.299948	-0.185487	0.85451	0.916282	0.421631
Q15008	PSMD6	0.395018	-0.221497	1.01153	1.32711	0.197788	0.470988	0.614474	0.0679913	1.16096	2.32895	0.0292252	0.407184	0.117904	-0.498611	0.734419	0.396112	0.695755	0.930987	0.371754	-0.244761	0.988269	1.24895	0.224527	0.499088	-0.164094	-0.830007	0.501819	-0.510398	0.614746	0.769242	0.821236
Q15102	PAFAH1B3	-0.0263862	-0.237035	0.184262	-0.259449	0.797649	0.907366	-0.0207534	-0.207473	0.165967	-0.230214	0.820007	0.954502	-0.0705913	-0.28124	0.140057	-0.694107	0.494723	0.828437	-0.00995319	-0.220602	0.200695	-0.0978673	0.922905	0.973493	-0.136213	-0.36374	0.0913129	-1.24	0.227758	0.422939	0.178775
Q15181	PPA1	-0.00249998	-0.452273	0.447273	-0.0115127	0.990916	0.996514	0.270922	-0.127759	0.669603	1.40751	0.172946	0.618783	0.132	-0.317773	0.581773	0.607877	0.549359	0.857771	0.155392	-0.294381	0.605165	0.715599	0.481603	0.717791	0.166528	-0.319282	0.652338	0.709995	0.485005	0.659688	0.0360898
Q15257;Q15257-2	PTPA	-0.0288897	-0.389812	0.332033	-0.165792	0.869802	0.947597	0.208317	-0.111606	0.528241	1.34869	0.190861	0.644586	-0.090884	-0.451806	0.270038	-0.521564	0.607073	0.887137	0.0417174	-0.319205	0.40264	0.239407	0.812958	0.902784	-0.154104	-0.543945	0.235736	-0.81877	0.421509	0.603852	0.0360898
Q15365	PCBP1	-0.435783	-0.805852	-0.0657145	-2.43906	0.0230535	0.213054	-0.0409835	-0.369014	0.287048	-0.258778	0.79816	0.954502	-0.28747	-0.657539	0.0825984	-1.60896	0.121574	0.620476	-0.543968	-0.914037	-0.173899	-3.04456	0.00584974	0.0744442	-0.405257	-0.804977	-0.00553706	-2.09995	0.0471619	0.164326	0.909389
Q15366;Q15366-2;Q15366-3;Q15366-6	PCBP2	-0.29535	-0.703526	0.112827	-1.49873	0.147851	0.394488	0.440429	0.0786199	0.802239	2.52133	0.0192554	0.349174	0.353468	-0.0547088	0.761644	1.79364	0.086329	0.599783	0.105325	-0.302852	0.513501	0.534461	0.598267	0.802196	0.0676171	-0.373264	0.508498	0.317665	0.75367	0.861337	0.691423
Q15404	RSU1	0.109174	-1.94962	2.16797	0.109835	0.913514	0.962325	1.44747	-0.377454	3.2724	1.64285	0.114323	0.574788	0.540208	-1.51858	2.599	0.543478	0.592148	0.874708	1.16908	-0.889713	3.22787	1.17616	0.251832	0.53684	1.39927	-0.824478	3.62302	1.30332	0.205652	0.404709	0.612056
Q15435	PPP1R7	0.0249806	-0.417758	0.467719	0.116866	0.908003	0.962325	0.0897069	-0.302739	0.482152	0.473457	0.640451	0.909956	-0.0191183	-0.461857	0.42362	-0.0894409	0.929523	0.983389	-0.101977	-0.544716	0.340761	-0.477079	0.637909	0.820784	-0.184227	-0.662439	0.293985	-0.797935	0.433253	0.612056	0.880735
Q15582	TGFBI	0.611919	-0.0199847	1.24382	2.00575	0.0570593	0.282822	0.337232	-0.222891	0.897355	1.24704	0.225216	0.684266	-0.0852502	-0.717154	0.546654	-0.279433	0.782466	0.948326	0.571366	-0.0605377	1.20327	1.87282	0.0741499	0.311457	0.716814	0.0342794	1.39935	2.17528	0.0403864	0.145965	0.773284
Q15631	TSN	-0.147609	-0.403557	0.10834	-1.19452	0.244723	0.526412	-0.0373256	-0.2642	0.189549	-0.340765	0.736443	0.951668	-0.153382	-0.409331	0.102567	-1.24124	0.22731	0.682215	-0.0816338	-0.337583	0.174315	-0.660618	0.515568	0.741584	-0.328044	-0.604501	-0.0515879	-2.45776	0.0221335	0.111766	0.440827
Q15691	MAPRE1	-0.0639241	-0.357904	0.230056	-0.450381	0.656747	0.824348	-0.0253073	-0.285893	0.235278	-0.201154	0.842386	0.961184	-0.0526251	-0.346605	0.241355	-0.370774	0.714276	0.930987	-0.1891	-0.48308	0.10488	-1.33231	0.196101	0.470114	-0.218652	-0.536187	0.0988823	-1.42625	0.16753	0.369291	0.440827
Q15819	UBE2V2	-0.255338	-0.710191	0.199516	-1.16272	0.257131	0.541648	0.0229664	-0.380218	0.426151	0.117984	0.907128	0.986362	0.0591868	-0.395667	0.51404	0.269517	0.789989	0.94852	0.177524	-0.27733	0.632377	0.808385	0.427338	0.685951	0.145598	-0.3457	0.636896	0.613824	0.545491	0.710349	0.124421
Q15843	NEDD8	0.786424	-0.685929	2.25878	1.10631	0.280285	0.563736	0.652517	-0.652584	1.95762	1.03558	0.311408	0.750596	0.157626	-1.31473	1.62998	0.221742	0.826515	0.958465	-0.705587	-2.17794	0.766766	-0.992596	0.331467	0.617813	0.83243	-0.757893	2.42275	1.08417	0.289777	0.471866	0.124421
Q15907;Q15907-2	RAB11B	0.0484599	-0.407482	0.504402	0.220144	0.827745	0.91657	-0.0380088	-0.442158	0.36614	-0.194794	0.847303	0.963616	-0.0307966	-0.486738	0.425145	-0.139903	0.889982	0.974667	-0.400011	-0.855953	0.0559308	-1.81717	0.0825407	0.328984	-0.0145775	-0.507051	0.477896	-0.0613103	0.951654	0.970741	0.124421
Q15942	ZYX	-0.055918	-1.02139	0.909555	-0.119963	0.905578	0.962325	-0.123296	-0.979096	0.732504	-0.298408	0.768132	0.954502	-0.763743	-1.72922	0.20173	-1.63848	0.115238	0.616912	-0.257076	-1.22255	0.708397	-0.551512	0.586721	0.791184	-0.332219	-1.37505	0.710611	-0.659849	0.516052	0.68807	0.124421
Q16401;Q16401-2	PSMD5	-0.103618	-0.395483	0.188247	-0.735339	0.469733	0.702625	0.258123	-0.000587487	0.516834	2.06655	0.0504796	0.46278	-0.0398457	-0.331711	0.252019	-0.28277	0.77994	0.948326	0.266365	-0.0254997	0.55823	1.89029	0.0716742	0.310522	-0.155357	-0.470607	0.159893	-1.02072	0.31824	0.499774	0.124421
Q16531	DDB1	-0.500824	-0.787722	-0.213925	-3.61568	0.00149236	0.108833	0.00778003	-0.246528	0.262088	0.0633657	0.950035	0.993462	-0.194373	-0.481272	0.0925249	-1.40327	0.174191	0.662129	-0.06274	-0.349638	0.224158	-0.45295	0.654924	0.831205	-0.124409	-0.434294	0.185477	-0.83154	0.414411	0.596082	0.124421
Q16610;Q16610-4	ECM1	0.198279	-0.431026	0.827583	0.652602	0.520628	0.74653	0.175594	-0.382225	0.733413	0.652004	0.521007	0.838434	0.00944863	-0.619856	0.638753	0.0310986	0.975465	0.993607	0.0991138	-0.530191	0.728418	0.326217	0.747276	0.8751	0.65003	-0.029697	1.32976	1.98076	0.0599771	0.194994	0.124421
Q16658	FSCN1	-0.0127141	-0.786005	0.760577	-0.0340546	0.973134	0.989816	0.215824	-0.469625	0.901274	0.652166	0.520904	0.838434	0.127764	-0.645527	0.901055	0.342215	0.735366	0.931808	-0.226308	-0.9996	0.546983	-0.606166	0.550475	0.768506	0.330311	-0.504939	1.16556	0.819107	0.421321	0.603852	0.124421
Q16774	GUK1	-0.266851	-0.558356	0.0246535	-1.89608	0.0708698	0.297806	-0.172688	-0.431079	0.0857038	-1.38426	0.179863	0.629489	-0.478232	-0.769736	-0.186727	-3.39802	0.0025264	0.299799	-0.112421	-0.403925	0.179084	-0.798792	0.432766	0.685951	-0.45538	-0.770241	-0.140519	-2.99563	0.00655832	0.0542968	0.124421
Q16775-2	HAGH	-0.0991007	-0.361125	0.162924	-0.783373	0.44158	0.688254	-0.0841289	-0.316389	0.148131	-0.750248	0.460883	0.825172	-0.0567928	-0.318817	0.205232	-0.448937	0.657773	0.912933	-0.0693241	-0.331349	0.1927	-0.547994	0.589094	0.792883	-0.250674	-0.533693	0.0323451	-1.83454	0.079838	0.233929	0.124421
Q16851-2	UGP2	-0.0967849	-0.29059	0.0970198	-1.03437	0.311957	0.585206	-0.137111	-0.3089	0.0346786	-1.65314	0.112196	0.574788	-0.247257	-0.441062	-0.0534522	-2.64252	0.0147116	0.401974	-0.154129	-0.347934	0.0396754	-1.64723	0.113413	0.375582	-0.295822	-0.505155	-0.0864891	-2.92703	0.00769182	0.059528	0.124421
Q16881;Q16881-2;Q16881-3;Q16881-4;Q16881-5;Q16881-6	TXNRD1	0.105199	-0.431316	0.641714	0.406129	0.688486	0.839663	0.261472	-0.214098	0.737042	1.13879	0.266775	0.712099	-0.209372	-0.745887	0.327143	-0.808295	0.427388	0.805028	-0.696012	-1.23253	-0.159497	-2.687	0.0133125	0.120985	-0.0398992	-0.619402	0.539603	-0.142608	0.88787	0.931009	0.124421
Q2TAA2	IAH1	0.0158878	-0.764558	0.796334	0.0421653	0.966739	0.987817	0.279693	-0.412099	0.971484	0.837413	0.411171	0.802066	-0.121139	-0.901585	0.659307	-0.321495	0.750804	0.936204	-0.302554	-1.083	0.477891	-0.802961	0.430402	0.685951	0.00493844	-0.838039	0.847916	0.0121341	0.990426	0.994616	0.124421
Q3LXA3	TKFC	0.185013	-0.0662021	0.436227	1.52542	0.141095	0.384017	0.0228152	-0.199863	0.245493	0.212217	0.833849	0.954502	0.182917	-0.0682978	0.434132	1.50814	0.145438	0.634427	-0.00803516	-0.25925	0.24318	-0.0662495	0.947765	0.976886	-0.15556	-0.426902	0.115783	-1.18744	0.247445	0.441478	0.124421
Q53H96;Q53H96-2	PYCR3	-0.224361	-0.812091	0.363368	-0.790687	0.437386	0.688254	-0.0567853	-0.577752	0.464181	-0.225767	0.823422	0.954502	-0.0867575	-0.674487	0.500972	-0.305748	0.762609	0.940985	-0.148146	-0.735875	0.439584	-0.52209	0.606712	0.806623	0.188781	-0.446039	0.823601	0.615944	0.544116	0.710349	0.124421
Q5H9T9	FSCB	-0.474988	-1.05219	0.102209	-1.70448	0.102069	0.330334	-0.764598	-1.27623	-0.252967	-3.09535	0.0051922	0.17604	-0.734233	-1.31143	-0.157036	-2.63477	0.0149688	0.401974	-0.890747	-1.46794	-0.31355	-3.19642	0.00408938	0.0632965	-1.35653	-1.97998	-0.733088	-4.50678	0.000166903	0.0063936	0.124421
Q5JS54;Q5JS54-2;Q5JS54-3	PSMG4	-0.134155	-0.682577	0.414268	-0.506669	0.617319	0.797839	0.231368	-0.254757	0.717493	0.985799	0.334719	0.77019	0.144411	-0.404012	0.692834	0.545405	0.590844	0.874596	0.447786	-0.100637	0.996209	1.69118	0.104616	0.35811	-0.0840293	-0.676394	0.508335	-0.293816	0.771593	0.872022	0.488472
Q5K130	CLLU1OS	-0.163056	-0.923532	0.59742	-0.444105	0.661211	0.824348	-0.402518	-1.07661	0.271572	-1.2368	0.22892	0.684266	-0.494612	-1.25509	0.265864	-1.34714	0.191353	0.669511	-1.30292	-2.0634	-0.542445	-3.54868	0.00175599	0.0403312	-0.704553	-1.52596	0.116855	-1.77659	0.0891658	0.248197	0.0433049
Q5QJ74	TBCEL	-1.11533	-2.35923	0.128572	-1.85717	0.0764323	0.304341	-0.405302	-1.5079	0.697299	-0.761367	0.454348	0.825172	1.01476	-0.229137	2.25866	1.68971	0.1049	0.61312	-0.118266	-1.36217	1.12563	-0.196929	0.845652	0.927742	0.290253	-1.05331	1.63382	0.447457	0.658825	0.795967	0.0575798
Q5T4S7;Q5T4S7-2;Q5T4S7-3;Q5T4S7-4	UBR4	-0.464707	-1.08596	0.156545	-1.54933	0.13526	0.377666	0.260104	-0.290578	0.810785	0.978318	0.338324	0.77019	0.494415	-0.126837	1.11567	1.64838	0.113176	0.61312	0.331258	-0.289995	0.95251	1.10441	0.28109	0.570189	-0.546845	-1.21787	0.124184	-1.68794	0.105244	0.276508	0.430368
Q5TDH0	DDI2	-0.338083	-0.627027	-0.0491395	-2.42351	0.0238452	0.213054	-0.0931146	-0.349236	0.163007	-0.753019	0.459249	0.825172	-0.133577	-0.42252	0.155367	-0.957525	0.348483	0.758421	-0.204544	-0.493488	0.0843997	-1.46625	0.156424	0.42952	-0.582571	-0.894666	-0.270476	-3.8663	0.000809078	0.014562	0.430368
Q5VVQ6	YOD1	0.00445198	-0.294478	0.303382	0.0308473	0.975663	0.990973	0.0643015	-0.200671	0.329274	0.502636	0.620107	0.905716	0.158334	-0.140596	0.457264	1.09708	0.284214	0.715055	0.0147679	-0.284162	0.313698	0.102326	0.919405	0.972684	-0.132469	-0.45535	0.190412	-0.84978	0.404403	0.584047	0.968248
Q5VW32	BROX	-0.310435	-0.664275	0.0434055	-1.81718	0.0825403	0.315961	-0.222661	-0.536307	0.0909852	-1.47041	0.155304	0.587965	-0.222611	-0.576451	0.13123	-1.30308	0.20573	0.682215	-0.237264	-0.591105	0.116576	-1.38886	0.178477	0.450433	-0.440464	-0.822655	-0.0582728	-2.38706	0.0258003	0.119226	0.517129
Q5XPI4	RNF123	-0.123439	-0.382484	0.135606	-0.986983	0.334151	0.602318	0.0296495	-0.19997	0.259269	0.26745	0.79156	0.954502	-0.0953858	-0.354431	0.16366	-0.762679	0.453581	0.819986	-0.198134	-0.457179	0.0609115	-1.58422	0.127105	0.39008	-0.295566	-0.575367	-0.0157654	-2.18796	0.0393368	0.144213	0.0077322
Q6B0K9	HBM	-0.351455	-0.766088	0.0631768	-1.75566	0.0927588	0.323843	0.143941	-0.223591	0.511473	0.811191	0.425758	0.804084	-0.228585	-0.643218	0.186047	-1.14188	0.265518	0.70018	-1.19639	-1.61102	-0.781757	-5.97645	4.7e-06	0.00069775	-0.303157	-0.751011	0.144697	-1.40205	0.174551	0.370008	0.458094
Q6EEV6	SUMO4	0.210947	-0.257354	0.679248	0.933001	0.360728	0.629507	-0.00309543	-0.4182	0.412009	-0.0154454	0.987813	0.993462	-0.0281136	-0.496414	0.440187	-0.124344	0.902148	0.974667	-0.172531	-0.640832	0.29577	-0.76309	0.45334	0.698351	0.461283	-0.0445397	0.967105	1.88887	0.0718728	0.215477	0.422939
Q6ICL3	TANGO2	-0.16151	-0.476526	0.153505	-1.06195	0.299531	0.579069	-0.131744	-0.410975	0.147488	-0.977235	0.338848	0.77019	-0.0112396	-0.326255	0.303776	-0.0739013	0.941742	0.98606	-0.259912	-0.574928	0.0551032	-1.70895	0.101227	0.351577	-0.250733	-0.590989	0.0895225	-1.5263	0.140877	0.328169	0.721859
Q6PCE3	PGM2L1	-0.154448	-0.609537	0.300641	-0.702942	0.489305	0.721294	-0.00330405	-0.406697	0.400089	-0.0169649	0.986614	0.993462	-0.0136298	-0.468719	0.441459	-0.0620336	0.951084	0.989491	0.0250999	-0.429989	0.480189	0.114238	0.910063	0.96573	-0.391586	-0.883138	0.0999665	-1.65003	0.112836	0.28489	0.0433049
Q6UWP2	DHRS11	-0.370072	-0.901542	0.161398	-1.44225	0.163013	0.419009	-0.266216	-0.737314	0.204882	-1.17046	0.254069	0.704288	-0.275464	-0.806934	0.256006	-1.07354	0.294411	0.717018	-0.794116	-1.32559	-0.262646	-3.09484	0.00519845	0.0711788	-1.0861	-1.66015	-0.512046	-3.91878	0.000711298	0.0136877	0.648952
Q6UWP8	SBSN	0.450185	-0.415699	1.31607	1.07687	0.292953	0.573563	-0.414326	-1.18185	0.353199	-1.11811	0.275323	0.715585	-0.118015	-0.983899	0.747869	-0.282301	0.780294	0.948326	-0.0693599	-0.935244	0.796524	-0.165914	0.869707	0.939653	0.196769	-0.738493	1.13203	0.43577	0.667158	0.802393	0.288839
Q6XQN6;Q6XQN6-2	NAPRT	-0.108664	-0.304148	0.0868208	-1.15135	0.261683	0.548807	-0.0796052	-0.252884	0.0936734	-0.951547	0.351442	0.776892	-0.103676	-0.29916	0.091809	-1.09849	0.28361	0.715055	-0.109015	-0.3045	0.0864691	-1.15507	0.260186	0.544288	-0.350872	-0.562019	-0.139724	-3.44188	0.00227323	0.0323708	0.846117
Q7L5N1	COPS6	-0.213054	-0.644923	0.218816	-1.02181	0.317737	0.585206	-0.0533074	-0.436119	0.329504	-0.288427	0.775661	0.954502	-0.00367288	-0.435542	0.428197	-0.0176152	0.986101	0.995632	-0.0455721	-0.477442	0.386297	-0.218565	0.82896	0.91414	-0.600829	-1.0673	-0.134357	-2.66783	0.0138992	0.0838666	0.784521
Q7L9L4;Q7L9L4-2;Q9H8S9	MOB1A;MOB1B	-0.141467	-0.552701	0.269767	-0.712524	0.483467	0.717143	-0.040052	-0.404572	0.324468	-0.227581	0.822028	0.954502	0.0879893	-0.323245	0.499223	0.443174	0.661874	0.913283	-0.0998661	-0.5111	0.311368	-0.502994	0.619859	0.81278	0.0320779	-0.412106	0.476262	0.149581	0.882428	0.929422	0.953081
Q7Z4W1	DCXR	0.157772	-0.181988	0.497533	0.961815	0.346371	0.61195	0.167447	-0.133718	0.468613	1.15161	0.261576	0.710849	0.113607	-0.226153	0.453368	0.692575	0.495666	0.828437	0.193415	-0.146346	0.533176	1.1791	0.250682	0.535994	0.205576	-0.161407	0.57256	1.16027	0.258107	0.448225	0.283926
Q86UX7	FERMT3	-0.175933	-0.577983	0.226118	-0.906357	0.374356	0.642268	-0.223471	-0.579851	0.132908	-1.2988	0.207172	0.670483	0.180129	-0.221922	0.58218	0.927976	0.363273	0.77209	-0.112154	-0.514204	0.289897	-0.577785	0.569149	0.785817	-0.296494	-0.730759	0.13777	-1.41415	0.171012	0.370008	0.720818
Q86UX7;Q86UX7-2	FERMT3	-0.546465	-1.23324	0.140306	-1.6481	0.113233	0.354026	-0.327171	-0.935928	0.281587	-1.11318	0.27739	0.715585	0.0759535	-0.610818	0.762725	0.229071	0.820884	0.958465	-0.0124367	-0.699208	0.674335	-0.0375082	0.970411	0.981584	-0.734676	-1.47647	0.00712167	-2.05137	0.0520557	0.175657	0.720818
Q86VP6	CAND1	-0.0982034	-0.354875	0.158468	-0.792469	0.436368	0.688254	-0.00970086	-0.237216	0.217814	-0.0883147	0.930408	0.988732	-0.0792407	-0.335913	0.177431	-0.639446	0.528993	0.852134	-0.0344836	-0.291156	0.222188	-0.278271	0.783346	0.893611	-0.21996	-0.497197	0.0572774	-1.64333	0.114223	0.286362	0.458094
Q86X55;Q86X55-1	CARM1	-0.0852377	-0.36279	0.192314	-0.636094	0.531136	0.750526	-0.0440327	-0.290056	0.201991	-0.370708	0.714324	0.948165	-0.05188	-0.329432	0.225672	-0.387159	0.702278	0.930987	-0.00740483	-0.284957	0.270147	-0.0552591	0.95642	0.976886	-0.161809	-0.4616	0.137981	-1.11794	0.275392	0.46028	0.0278624
Q86YZ3	HRNR	0.530051	-1.2927	2.3528	0.602316	0.552989	0.760763	0.83552	-0.780173	2.45121	1.0711	0.295483	0.735609	1.42114	-0.401607	3.24389	1.61489	0.120277	0.620476	0.502291	-1.32046	2.32504	0.570772	0.573814	0.785817	-0.167108	-2.1359	1.80169	-0.175805	0.862021	0.919849	0.292454
Q8IUI8-2	CRLF3	0.423628	-0.0679421	0.915198	1.78498	0.0877607	0.322136	0.622213	0.186483	1.05794	2.95771	0.00716349	0.212517	0.271001	-0.220569	0.762571	1.14188	0.265518	0.70018	0.473387	-0.0181832	0.964957	1.99464	0.0583407	0.278783	0.44488	-0.0860767	0.975836	1.73547	0.0963413	0.261813	0.974218
Q8IVL0;Q8IVL0-2;Q8IVL0-3	NAV3	-1.2389	-3.31415	0.836345	-1.23652	0.229023	0.514375	-1.82786	-3.66737	0.0116502	-2.05814	0.0513478	0.46278	-0.980925	-3.05618	1.09432	-0.979037	0.337976	0.753092	-0.82353	-2.89878	1.25172	-0.821945	0.419737	0.682441	-0.543726	-2.78525	1.6978	-0.502424	0.620254	0.773416	0.131479
Q8IYT4;Q8IYT4-2	KATNAL2	-0.0180161	-0.28471	0.248678	-0.139921	0.889968	0.957913	-0.0251596	-0.261559	0.211239	-0.220441	0.827517	0.954502	-0.0989675	-0.365661	0.167726	-0.768623	0.450114	0.819986	-0.0260638	-0.292758	0.24063	-0.202422	0.841407	0.925938	-0.253578	-0.54164	0.0344844	-1.8233	0.0815779	0.238047	0.432391
Q8IZ83	ALDH16A1	-0.194136	-0.408766	0.0204937	-1.87348	0.0740552	0.299587	0.00108595	-0.189163	0.191335	0.0118228	0.990671	0.993462	-0.123795	-0.338424	0.0908349	-1.19467	0.244665	0.68884	-0.100586	-0.315216	0.114044	-0.970692	0.342026	0.625322	-0.159227	-0.391054	0.0725991	-1.42262	0.16857	0.369298	0.387222
Q8NDC0	MAPK1IP1L	0.713841	0.0245687	1.40311	2.14508	0.0429891	0.244866	0.832508	0.221533	1.44348	2.82227	0.00979051	0.268109	0.85488	0.165608	1.54415	2.5689	0.0173342	0.401974	0.353917	-0.335355	1.04319	1.06352	0.298834	0.593811	0.392759	-0.35174	1.13726	1.09269	0.286098	0.468077	0.012069
Q8TAC1	RFESD	-0.617255	-1.06353	-0.170977	-2.86479	0.00888011	0.163153	-0.32209	-0.717673	0.0734937	-1.68645	0.105534	0.569926	-0.314895	-0.761173	0.131383	-1.46148	0.157716	0.634427	-0.350892	-0.79717	0.0953857	-1.62855	0.117336	0.379744	-0.583728	-1.06576	-0.101692	-2.50822	0.019819	0.104527	0.370008
Q8WUM4;Q8WUM4-2	PDCD6IP	-0.195169	-0.459619	0.069281	-1.52862	0.140301	0.384017	0.0132307	-0.221179	0.247641	0.116907	0.907971	0.986362	-0.0822856	-0.346736	0.182164	-0.644487	0.525779	0.848878	0.02285	-0.2416	0.2873	0.178969	0.859565	0.936866	-0.219815	-0.505454	0.065824	-1.59395	0.124906	0.301469	0.387222
Q8WVJ2	NUDCD2	-0.496791	-1.01545	0.0218691	-1.98392	0.0596011	0.287708	-0.486149	-0.945892	-0.0264066	-2.19022	0.039152	0.407184	-0.317978	-0.836637	0.200682	-1.26984	0.217125	0.682215	-0.186595	-0.705255	0.332065	-0.745162	0.463891	0.70726	-0.0295469	-0.589764	0.53067	-0.109242	0.91398	0.94449	0.100009
Q8WW22;Q8WW22-2;Q8WW22-3	DNAJA4	-0.200745	-0.704352	0.302862	-0.825632	0.417685	0.682091	-0.0317816	-0.478181	0.414618	-0.147464	0.88408	0.97895	-0.0581319	-0.561739	0.445475	-0.239087	0.813203	0.958197	-0.435412	-0.939019	0.0681954	-1.79078	0.0867997	0.330043	-0.334539	-0.878496	0.209419	-1.27384	0.215728	0.416255	0.92677
Q8WZA0;Q8WZA0-2	LZIC	0.470723	-0.295114	1.23656	1.2731	0.215985	0.491315	0.415097	-0.263745	1.09394	1.26653	0.218285	0.684266	0.0468256	-0.719011	0.812662	0.126643	0.900348	0.974667	0.385923	-0.379914	1.15176	1.04375	0.30769	0.596935	0.514927	-0.312271	1.34213	1.28935	0.210381	0.410387	0.641097
Q92530	PSMF1	0.840748	0.0688285	1.61267	2.25594	0.0341195	0.230302	0.720001	0.0357673	1.40424	2.17953	0.0400321	0.407184	0.869175	0.0972548	1.64109	2.33221	0.0290224	0.451134	0.965463	0.193544	1.73738	2.59058	0.0165196	0.138376	0.109876	-0.723893	0.943645	0.272955	0.787379	0.878705	0.868613
Q92905	COPS5	0.591068	0.0657546	1.11638	2.33052	0.0291277	0.218849	0.551211	0.0855705	1.01685	2.45189	0.0224185	0.371209	0.614698	0.0893844	1.14001	2.42369	0.0238357	0.429673	0.575665	0.0503514	1.10098	2.26979	0.0331374	0.206963	0.249885	-0.317518	0.817288	0.912185	0.371346	0.554295	0.790726
Q93008;Q93008-1	USP9X	-0.21365	-0.556563	0.129263	-1.29048	0.209993	0.485438	-0.107108	-0.411068	0.196852	-0.729861	0.47301	0.829514	-0.0592155	-0.402128	0.283697	-0.357673	0.723923	0.930987	-0.209926	-0.552839	0.132987	-1.26799	0.217771	0.490673	-0.156962	-0.52735	0.213426	-0.877749	0.389361	0.569615	0.899639
Q93045;Q93045-2	STMN2	-0.423143	-0.870365	0.0240781	-1.95974	0.0625335	0.287759	0.0924295	-0.30399	0.488849	0.482936	0.633809	0.909956	-0.407984	-0.855205	0.0392378	-1.88953	0.0717808	0.599783	-0.86029	-1.30751	-0.413069	-3.98434	0.000605446	0.0239487	-0.18301	-0.666065	0.300044	-0.784717	0.440807	0.619043	0.823942
Q969T9	WBP2	0.111045	-0.30848	0.530569	0.548243	0.588926	0.782305	0.105477	-0.266392	0.477346	0.587491	0.562726	0.8729	0.0623542	-0.357171	0.481879	0.307852	0.761028	0.940715	-0.129638	-0.549163	0.289887	-0.640042	0.528612	0.748687	-0.159058	-0.612197	0.29408	-0.727041	0.474702	0.653748	0.150185
Q96AT9;Q96AT9-2;Q96AT9-4	RPE	0.022045	-0.299562	0.343653	0.141977	0.888362	0.957913	-0.0165063	-0.301581	0.268568	-0.119929	0.905604	0.986362	0.0178695	-0.303738	0.339477	0.115085	0.909399	0.974667	-0.0511717	-0.372779	0.270436	-0.329562	0.744781	0.8751	-0.11851	-0.465885	0.228866	-0.706623	0.487058	0.659688	0.560882
Q96DG6	CMBL	0.187537	-0.315858	0.690932	0.771634	0.448364	0.689492	0.26	-0.186212	0.706212	1.20688	0.240018	0.692769	0.0899405	-0.413454	0.593335	0.370067	0.714795	0.930987	0.226342	-0.277053	0.729737	0.9313	0.361588	0.641739	-0.323844	-0.867573	0.219884	-1.23364	0.230075	0.424387	0.312407
Q96F85	CNRIP1	-0.274475	-0.606297	0.0573472	-1.71329	0.100412	0.327953	-0.179234	-0.473363	0.114894	-1.26217	0.219821	0.684266	-0.104471	-0.436293	0.227351	-0.652114	0.520937	0.848152	-0.230706	-0.562528	0.101116	-1.44009	0.16362	0.441277	-0.62122	-0.979629	-0.262812	-3.59005	0.00158826	0.0245835	0.932934
Q96FW1	OTUB1	-0.160867	-0.48719	0.165456	-1.02106	0.318082	0.585206	0.0111413	-0.278113	0.300396	0.0797794	0.937118	0.993462	-0.124038	-0.450362	0.202285	-0.787303	0.439323	0.815309	0.0762881	-0.250035	0.402611	0.48422	0.632912	0.819333	-0.276179	-0.628648	0.0762904	-1.62294	0.118537	0.290029	0.370008
Q96G03	PGM2	-0.251675	-0.460529	-0.0428217	-2.49593	0.0203609	0.213054	-0.121965	-0.307094	0.0631634	-1.36457	0.185887	0.639379	-0.210733	-0.419587	-0.00188	-2.0899	0.0481389	0.53385	-0.0704055	-0.279259	0.138448	-0.69823	0.492191	0.719638	-0.233555	-0.459142	-0.00796732	-2.14441	0.043049	0.153255	0.430368
Q96GD0	PDXP	-0.107007	-0.609574	0.395561	-0.441012	0.663415	0.824348	0.395945	-0.0495331	0.841423	1.84095	0.0788599	0.532586	0.220094	-0.282473	0.722661	0.907085	0.373979	0.773523	0.349759	-0.152808	0.852326	1.44148	0.16323	0.441277	0.122388	-0.420446	0.665223	0.466989	0.645	0.790431	0.144213
Q96GG9	DCUN1D1	0.062096	-0.239274	0.363466	0.426774	0.673602	0.829174	0.305863	0.0387274	0.572999	2.37153	0.0266774	0.407184	0.0409369	-0.260433	0.342307	0.281351	0.781014	0.948326	0.163387	-0.137983	0.464758	1.12293	0.273312	0.560803	-0.268032	-0.593549	0.0574845	-1.70548	0.10188	0.27373	0.100009
Q96IU4	ABHD14B	-0.138105	-0.338576	0.062365	-1.4269	0.167345	0.425534	-0.0815532	-0.259251	0.0961447	-0.950589	0.351918	0.776892	-0.191353	-0.391824	0.00911692	-1.97706	0.0604206	0.568163	-0.173857	-0.374327	0.0266132	-1.79629	0.0858954	0.330043	-0.369654	-0.586187	-0.153122	-3.53595	0.00181098	0.0268629	0.400031
Q96IY4	CPB2	0.470954	-0.0981977	1.04011	1.71389	0.1003	0.327953	0.178951	-0.325548	0.68345	0.734696	0.470116	0.829514	0.490785	-0.0783669	1.05994	1.78606	0.0875803	0.599783	0.347027	-0.222124	0.916179	1.2629	0.219562	0.493149	0.753344	0.138589	1.3681	2.5382	0.0185527	0.100009	0.122819
Q96JM2;Q96JM2-3	ZNF462	0.114828	-2.05292	2.28257	0.109716	0.913607	0.962325	-0.249671	-2.17117	1.67183	-0.26913	0.790283	0.954502	-1.53477	-3.70252	0.632977	-1.46645	0.156369	0.634427	-0.0405241	-2.20827	2.12722	-0.0387203	0.969455	0.981584	-0.0107632	-2.3522	2.33067	-0.00952121	0.992487	0.995283	0.0390888
Q96KP4	CNDP2	0.186284	-0.604537	0.977105	0.487899	0.630344	0.80431	0.0626734	-0.638315	0.763661	0.185185	0.854744	0.963865	-0.224419	-1.01524	0.566402	-0.587782	0.562535	0.8632	-0.115057	-0.905878	0.675764	-0.301348	0.765918	0.886406	0.154283	-0.699902	1.00847	0.37411	0.711826	0.829493	0.656902
Q96NA2	RILP	-0.784519	-1.40665	-0.162388	-2.61189	0.0157539	0.207718	-0.413895	-0.965356	0.137565	-1.55457	0.13401	0.574788	-0.101108	-0.72324	0.521023	-0.336619	0.739525	0.931808	-0.282238	-0.904369	0.339894	-0.93965	0.35738	0.637731	-0.288465	-0.960444	0.383514	-0.889142	0.383339	0.562847	0.0575798
Q96P70	IPO9	0.0136011	-0.443607	0.47081	0.0616161	0.951413	0.97891	0.22832	-0.176952	0.633592	1.16689	0.255478	0.704288	0.270096	-0.187112	0.727305	1.22359	0.233771	0.682215	0.225492	-0.231717	0.6827	1.02153	0.317868	0.603456	0.249134	-0.244708	0.742975	1.04491	0.307167	0.489859	0.334196
Q96PD5	PGLYRP2	0.1454	-0.255479	0.546279	0.751251	0.460291	0.695664	0.21981	-0.135531	0.575151	1.28125	0.213159	0.680814	0.239333	-0.161546	0.640212	1.23658	0.229001	0.682215	0.378465	-0.0224144	0.779344	1.95545	0.0630675	0.291585	0.578486	0.145487	1.01148	2.7672	0.0111021	0.0767134	0.916282
Q96RK4;Q96RK4-2	BBS4	0.191307	-0.451765	0.834379	0.616175	0.543966	0.760763	0.202309	-0.367713	0.772331	0.735118	0.469865	0.829514	0.351977	-0.291095	0.995049	1.13367	0.268872	0.703811	0.300241	-0.342831	0.943313	0.967039	0.343809	0.625322	0.376406	-0.318191	1.071	1.12243	0.273522	0.459776	0.769242
Q99436	PSMB7	-0.0952427	-0.436469	0.245983	-0.578127	0.568923	0.7701	-0.0511771	-0.353642	0.251287	-0.350457	0.729257	0.951668	-0.133182	-0.474408	0.208044	-0.808421	0.427317	0.805028	-0.387625	-0.72885	-0.0463986	-2.3529	0.0277662	0.186505	-0.0465842	-0.41515	0.321982	-0.261792	0.795864	0.880735	0.422939
Q99460;Q99460-2	PSMD1	-0.182512	-0.489499	0.124475	-1.23142	0.230888	0.515336	0.0754228	-0.196692	0.347537	0.574095	0.571601	0.877112	0.0492418	-0.257745	0.356229	0.332237	0.742787	0.93254	-0.0259008	-0.332888	0.281086	-0.174754	0.862836	0.936866	-0.0740962	-0.40568	0.257487	-0.462846	0.647922	0.790726	0.659688
Q99497	PARK7	-0.192247	-0.438187	0.0536921	-1.61907	0.119372	0.360009	-0.129317	-0.347319	0.0886854	-1.22865	0.231906	0.684266	-0.160657	-0.406597	0.0852825	-1.35302	0.189494	0.669511	-0.093206	-0.339145	0.152734	-0.784963	0.440666	0.68957	-0.305301	-0.570946	-0.0396555	-2.38045	0.0261702	0.119226	0.603852
Q99627	COPS8	0.259469	-0.434263	0.953202	0.774689	0.446592	0.688254	-0.432686	-1.04761	0.182242	-1.45741	0.158825	0.592061	-0.183565	-0.877297	0.510167	-0.548065	0.589047	0.874596	-0.362147	-1.05588	0.331585	-1.08125	0.291044	0.583727	0.00793155	-0.741385	0.757248	0.0219243	0.982702	0.991395	0.164326
Q99733;Q99733-2	NAP1L4	-0.0114641	-0.373096	0.350168	-0.0656607	0.948228	0.977046	-0.174497	-0.495049	0.146056	-1.12751	0.271411	0.715585	-0.116044	-0.477676	0.245588	-0.664646	0.513035	0.838928	-0.178049	-0.53968	0.183583	-1.01978	0.318679	0.603456	-0.448638	-0.839245	-0.0580308	-2.37897	0.0262537	0.119226	0.861337
Q99832	CCT7	-0.108261	-0.310186	0.0936636	-1.1105	0.278517	0.561769	0.190342	0.0113545	0.369329	2.20265	0.0381516	0.407184	0.0405504	-0.161375	0.242475	0.415947	0.681391	0.930757	0.0469998	-0.154925	0.248925	0.482103	0.634391	0.819758	-0.0638392	-0.281943	0.154265	-0.606259	0.550414	0.715136	0.404709
Q9BQA1	WDR77	0.0412242	-0.405109	0.487557	0.191305	0.850003	0.935397	0.461898	0.0662661	0.857529	2.41818	0.0241221	0.381704	0.180317	-0.266016	0.626649	0.836779	0.41152	0.796203	0.147572	-0.298761	0.593905	0.684824	0.500452	0.728675	-0.217623	-0.699718	0.264471	-0.934989	0.359725	0.544946	0.612056
Q9BRA2	TXNDC17	0.00798747	-0.404931	0.420906	0.0400662	0.968394	0.987817	0.0942641	-0.271749	0.460277	0.533437	0.598964	0.893236	0.0728117	-0.340107	0.48573	0.365234	0.718349	0.930987	-0.232947	-0.645865	0.179971	-1.16849	0.254845	0.541641	-0.00938666	-0.455389	0.436616	-0.043592	0.965614	0.977976	0.145965
Q9BRF8	CPPED1	-0.449951	-0.932707	0.0328051	-1.93051	0.0662482	0.287759	-0.1418	-0.569718	0.286117	-0.686359	0.499503	0.838434	-0.298472	-0.781228	0.184284	-1.28059	0.213388	0.682215	-0.772611	-1.25537	-0.289855	-3.31487	0.00308397	0.0522806	-0.792174	-1.31361	-0.270738	-3.14668	0.00460038	0.0433049	0.111766
Q9BS40	LXN	-0.233796	-0.50693	0.0393386	-1.77294	0.0897843	0.323843	-0.220674	-0.462782	0.0214334	-1.88789	0.0720104	0.517893	-0.179839	-0.452973	0.0932957	-1.36377	0.186136	0.66648	-0.134773	-0.407908	0.138361	-1.02203	0.317638	0.603456	-0.403747	-0.698765	-0.108728	-2.83461	0.00951759	0.0691482	0.369291
Q9BSL1	UBAC1	-0.265306	-0.561678	0.0310655	-1.85415	0.0768791	0.304341	-0.0823312	-0.345037	0.180374	-0.649126	0.522831	0.838434	-0.051476	-0.347848	0.244896	-0.359751	0.722389	0.930987	-0.264753	-0.561124	0.031619	-1.85028	0.0774553	0.314365	-0.219932	-0.54005	0.100186	-1.42302	0.168454	0.369298	0.710349
Q9BT73	PSMG3	-0.122537	-0.533284	0.28821	-0.617912	0.54284	0.760763	0.166074	-0.198015	0.530163	0.944774	0.354814	0.776892	-0.0295078	-0.440255	0.38124	-0.148798	0.883039	0.974667	0.223796	-0.186951	0.634544	1.12853	0.270993	0.557649	-0.00105302	-0.444711	0.442605	-0.00491609	0.996121	0.997522	0.471866
Q9BT78	COPS4	-0.164797	-0.505653	0.176059	-1.00141	0.327283	0.596671	-0.0817876	-0.383924	0.220349	-0.560683	0.580557	0.882105	0.0843432	-0.256513	0.4252	0.512522	0.613283	0.89296	-0.0447672	-0.385624	0.296089	-0.272033	0.788078	0.893611	-0.21484	-0.583007	0.153327	-1.20866	0.239349	0.433437	0.970741
Q9BV20	MRI1	-0.252218	-1.38496	0.880529	-0.461186	0.649094	0.819424	0.227503	-0.776569	1.23158	0.469306	0.643369	0.909956	-0.193907	-1.32665	0.93884	-0.354564	0.72622	0.930987	0.106008	-1.02674	1.23875	0.193838	0.848043	0.928933	1.10997	-0.113537	2.33347	1.87905	0.0732592	0.217378	0.68807
Q9BWD1	ACAT2	-0.042376	-0.683134	0.598382	-0.136981	0.892265	0.958209	-0.224897	-0.792868	0.343075	-0.820144	0.420742	0.804084	-0.263568	-0.904326	0.37719	-0.851986	0.403203	0.788683	-0.220844	-0.861602	0.419914	-0.71388	0.482645	0.717791	-0.221684	-0.913781	0.470414	-0.663438	0.513794	0.686344	0.499774
Q9BY32;Q9BY32-3	ITPA	-0.266839	-1.08431	0.550636	-0.676096	0.505874	0.732077	-0.349871	-1.07448	0.374743	-1.00008	0.327911	0.77019	-0.33921	-1.15668	0.478265	-0.859465	0.399153	0.786611	-0.0322422	-0.849717	0.785233	-0.0816928	0.935614	0.97677	-1.38217	-2.26514	-0.499197	-3.24226	0.00366741	0.0410624	0.596082
Q9C0C9	UBE2O	0.0356295	-0.205609	0.276868	0.305912	0.762485	0.885627	0.350082	0.136247	0.563917	3.39097	0.0025696	0.135526	0.122995	-0.118243	0.364234	1.05603	0.302167	0.723758	-0.247062	-0.488301	-0.00582376	-2.12126	0.0451484	0.23294	0.0204227	-0.240145	0.28099	0.16234	0.872488	0.924421	0.194994
Q9GZP4	PITHD1	0.0172251	-0.191089	0.225539	0.171268	0.865544	0.945733	0.0492069	-0.135444	0.233858	0.551961	0.586418	0.886475	0.0615259	-0.146788	0.26984	0.611749	0.546839	0.857771	-0.157493	-0.365808	0.0508206	-1.56595	0.131324	0.398156	-0.128203	-0.353208	0.0968018	-1.18016	0.25027	0.441478	0.603852
Q9GZT8	NIF3L1	-0.00293288	-0.453011	0.447145	-0.0134971	0.98935	0.996347	-0.100204	-0.499156	0.298747	-0.520235	0.607984	0.896241	-0.314045	-0.764123	0.136033	-1.44523	0.162183	0.635041	-0.218412	-0.66849	0.231666	-1.00513	0.325526	0.612902	-0.338183	-0.824323	0.147957	-1.44087	0.163401	0.361308	0.0542968
Q9GZT8;Q9GZT8-2	NIF3L1	-0.0942439	-0.620844	0.432356	-0.370686	0.71434	0.850518	-0.210568	-0.677349	0.256213	-0.934356	0.360045	0.779185	0.0124034	-0.514197	0.539004	0.0487859	0.961521	0.990672	-0.457559	-0.984159	0.0690413	-1.7997	0.0853398	0.330043	-0.168922	-0.737715	0.399872	-0.615127	0.544646	0.710349	0.233929
Q9H0R4	HDHD2	0.0619668	-0.494078	0.618012	0.230825	0.819538	0.913162	0.461727	-0.0311536	0.954608	1.94034	0.0649779	0.503259	0.441882	-0.114163	0.997927	1.646	0.113668	0.61312	0.975612	0.419567	1.53166	3.63413	0.00142686	0.0381291	0.244503	-0.356094	0.8451	0.843209	0.407991	0.588035	0.059528
Q9H0U4	RAB1B	-0.0985713	-0.41312	0.215977	-0.649078	0.522862	0.74653	-0.268183	-0.547	0.0106342	-1.99226	0.0586189	0.497805	-0.268843	-0.583391	0.0457052	-1.77029	0.0902345	0.600439	-0.346918	-0.661466	-0.0323696	-2.2844	0.0321286	0.204246	-0.208244	-0.547995	0.131507	-1.26954	0.21723	0.418022	0.931009
Q9H173	SIL1	1.16952	-0.0471497	2.3862	1.99099	0.0587675	0.286592	0.787699	-0.290767	1.86617	1.51282	0.144252	0.581747	0.357322	-0.859352	1.574	0.608302	0.549082	0.857771	0.0610015	-1.15567	1.27768	0.103849	0.91821	0.972684	0.46771	-0.846448	1.78187	0.737162	0.468645	0.648952	0.994616
Q9H299	SH3BGRL3	0.062177	-0.468624	0.592978	0.242623	0.810497	0.908777	0.239872	-0.230632	0.710377	1.05597	0.302196	0.739393	0.133897	-0.396904	0.664698	0.522484	0.606443	0.887137	-0.555223	-1.08602	-0.0244219	-2.16655	0.0411237	0.221819	0.180694	-0.392636	0.754025	0.652789	0.52051	0.691423	0.441478
Q9H3K6	BOLA2;BOLA2B	0.239605	-0.472028	0.951238	0.697386	0.492708	0.721994	0.361993	-0.268802	0.992789	1.18863	0.246986	0.695411	0.261258	-0.450374	0.972891	0.76041	0.454908	0.819986	0.256333	-0.4553	0.967966	0.746075	0.46335	0.70726	0.41761	-0.351041	1.18626	1.12532	0.27232	0.45946	0.710349
Q9H479	FN3K	0.0515108	-0.37939	0.482412	0.247602	0.806689	0.907366	-0.0494906	-0.431444	0.332462	-0.268378	0.790855	0.954502	-0.0284731	-0.459374	0.402428	-0.136864	0.892356	0.974667	0.033967	-0.396934	0.464868	0.163272	0.871762	0.940447	-0.0552161	-0.520643	0.41021	-0.245724	0.808124	0.887881	0.0063936
Q9H4B7	TUBB1	0.0391734	-0.705101	0.783447	0.109017	0.914156	0.962325	0.325718	-0.334011	0.985446	1.02261	0.317367	0.758273	-0.216719	-0.960993	0.527555	-0.603113	0.552468	0.860737	0.0999423	-0.644332	0.844216	0.278131	0.783453	0.893611	0.0838361	-0.720072	0.887744	0.216002	0.830933	0.899125	0.872022
Q9H4G4	GLIPR2	-0.520988	-1.2001	0.158125	-1.58898	0.126024	0.363418	0.124026	-0.477944	0.725995	0.426748	0.673621	0.92198	0.0613354	-0.617778	0.740448	0.187069	0.853284	0.971267	0.349273	-0.32984	1.02839	1.06526	0.298061	0.593811	-0.0928144	-0.82634	0.640712	-0.26208	0.795646	0.880735	0.248197
Q9H7C9	AAMDC	-1.05467	-1.91763	-0.191719	-2.53142	0.0188322	0.213054	-0.0529196	-0.817847	0.712008	-0.143295	0.887334	0.980785	-0.368624	-1.23158	0.49433	-0.884768	0.385643	0.78209	-0.000432377	-0.863387	0.862522	-0.00103779	0.999181	0.999181	-0.462	-1.3941	0.470097	-1.02663	0.31551	0.4981	0.795967
Q9HA64	FN3KRP	-0.227	-0.62697	0.172969	-1.17553	0.252078	0.535761	-0.215018	-0.569553	0.139517	-1.25617	0.221945	0.684266	-0.138562	-0.538532	0.261407	-0.71755	0.480422	0.822261	-0.163474	-0.563443	0.236496	-0.846555	0.406161	0.677253	-0.199174	-0.63119	0.232842	-0.954919	0.349771	0.53327	0.276508
Q9HC38;Q9HC38-2	GLOD4	-0.0701545	-0.27857	0.138261	-0.697202	0.492821	0.721994	0.0459548	-0.138786	0.230696	0.515231	0.611419	0.897588	-0.0846017	-0.293017	0.123814	-0.840779	0.409322	0.794107	-0.0348359	-0.243252	0.17358	-0.346202	0.732409	0.871145	-0.304121	-0.529236	-0.0790066	-2.79819	0.0103449	0.0736555	0.014562
Q9NP79	VTA1	0.0836265	-0.228693	0.395945	0.554599	0.584643	0.780007	0.330071	0.0532302	0.606913	2.46951	0.0215731	0.365716	0.257379	-0.05494	0.569698	1.7069	0.101612	0.61312	-0.0234076	-0.335727	0.288911	-0.155236	0.87802	0.941491	-0.147632	-0.484975	0.189711	-0.906445	0.37431	0.556385	0.584047
Q9NPQ8;Q9NPQ8-2;Q9NPQ8-3;Q9NPQ8-4	RIC8A	0.313108	-0.229558	0.855773	1.19507	0.244508	0.526412	0.21403	-0.266991	0.695052	0.921604	0.366517	0.781329	0.0853361	-0.457329	0.628002	0.325712	0.747653	0.935552	0.184272	-0.358394	0.726937	0.703331	0.489067	0.717971	0.0364945	-0.549651	0.62264	0.12896	0.898536	0.935318	0.119226
Q9NR45	NANS	-0.256366	-0.656468	0.143736	-1.32716	0.197772	0.470988	-0.193628	-0.54828	0.161025	-1.13083	0.270041	0.714757	-0.265587	-0.665689	0.134515	-1.37489	0.182708	0.66648	-0.475677	-0.875779	-0.0755744	-2.46249	0.0219063	0.165928	-0.281276	-0.713436	0.150884	-1.3481	0.191049	0.385247	0.144213
Q9NRC6	SPTBN5	-0.68199	-1.43446	0.0704848	-1.87724	0.0735173	0.299111	-0.630542	-1.29754	0.0364555	-1.95805	0.0627434	0.503259	-0.272825	-1.0253	0.47965	-0.750975	0.460454	0.820044	-0.551172	-1.30365	0.201302	-1.51715	0.14316	0.406095	-0.116039	-0.928804	0.696726	-0.295714	0.770162	0.871789	0.370008
Q9NRV9	HEBP1	-0.222982	-0.513681	0.0677168	-1.58877	0.126073	0.363418	-0.0387226	-0.2964	0.218955	-0.311259	0.758471	0.954502	-0.00661136	-0.29731	0.284088	-0.0471065	0.962844	0.990672	-0.0935116	-0.384211	0.197187	-0.666279	0.51201	0.737958	-0.238899	-0.55289	0.0750916	-1.57591	0.12901	0.308238	0.215477
Q9NRX4	PHPT1	-0.44998	-1.35866	0.4587	-1.02569	0.315945	0.585206	-0.20884	-1.0143	0.596619	-0.537037	0.596516	0.893236	-0.285521	-1.1942	0.623159	-0.650821	0.521757	0.848152	-0.0500856	-0.958765	0.858594	-0.114166	0.91012	0.96573	-0.522145	-1.50363	0.459341	-1.1019	0.28216	0.46612	0.328169
Q9NT62;Q9NT62-2	ATG3	-0.00933169	-0.538797	0.520134	-0.0365053	0.971202	0.989264	0.392938	-0.0763826	0.86226	1.73416	0.0965787	0.567703	0.567958	0.0384928	1.09742	2.22184	0.0366524	0.506638	-0.0889785	-0.618444	0.440487	-0.348081	0.731016	0.871145	0.253706	-0.318183	0.825594	0.918867	0.367915	0.550986	0.28489
Q9NTK5	OLA1	-0.111057	-0.393294	0.171181	-0.81501	0.423613	0.688254	-0.0318096	-0.281986	0.218367	-0.263357	0.794673	0.954502	-0.144736	-0.426974	0.137501	-1.06218	0.299429	0.720248	-0.0580733	-0.340311	0.224164	-0.426183	0.674026	0.841941	-0.109588	-0.41444	0.195263	-0.744578	0.464237	0.646843	0.0136877
Q9NWV4	CZIB	0.099311	-0.389778	0.5884	0.420574	0.678057	0.832374	0.173397	-0.260135	0.606928	0.828426	0.416135	0.804084	0.124812	-0.364277	0.613901	0.528569	0.602282	0.884175	0.42057	-0.0685194	0.909659	1.78108	0.0884115	0.330043	0.205778	-0.322498	0.734055	0.806811	0.428225	0.609349	0.802393
Q9NY33;Q9NY33-4	DPP3	-1.0303	-2.21905	0.158439	-1.79519	0.0860745	0.322015	-0.0618578	-1.11557	0.991851	-0.121593	0.904302	0.986362	-0.159291	-1.34803	1.02945	-0.277547	0.783895	0.948326	-0.730755	-1.9195	0.457989	-1.27326	0.21593	0.489229	-1.18633	-2.47032	0.0976584	-1.91372	0.0684679	0.209224	0.0323708
Q9NZD4	AHSP	-0.216103	-0.550892	0.118686	-1.33697	0.194599	0.466513	-0.0111976	-0.307956	0.285561	-0.0781544	0.938396	0.993462	-0.293652	-0.628441	0.0411372	-1.81675	0.0826075	0.599783	-0.607212	-0.942001	-0.272423	-3.75667	0.00105824	0.0327594	-0.0997633	-0.461377	0.26185	-0.571425	0.573378	0.729009	0.0838666
Q9NZP8	C1RL	0.381032	0.0388378	0.723227	2.30634	0.0306678	0.227335	-0.0560975	-0.35942	0.247225	-0.383064	0.705269	0.943894	0.258116	-0.0840784	0.60031	1.56234	0.132171	0.620476	0.0640973	-0.278097	0.406292	0.387972	0.701685	0.859129	0.296296	-0.0733157	0.665909	1.6604	0.110713	0.283926	0.929422
Q9UBQ7	GRHPR	-0.32622	-1.04116	0.38872	-0.945093	0.354655	0.621957	-0.825794	-1.45952	-0.192068	-2.699	0.0129571	0.274412	-0.554638	-1.26958	0.160302	-1.60684	0.122039	0.620476	-0.318253	-1.03319	0.396686	-0.922014	0.366307	0.642647	-0.124919	-0.897142	0.647305	-0.335057	0.740687	0.849226	0.929422
Q9UDX3	SEC14L4	0.95204	-0.552084	2.45616	1.31101	0.203084	0.478795	1.22605	-0.107209	2.55932	1.9047	0.0696867	0.511515	1.41931	-0.0848187	2.92343	1.95446	0.0631911	0.576821	1.03738	-0.466746	2.5415	1.42852	0.166883	0.446695	0.110556	-1.51408	1.7352	0.140948	0.889166	0.931009	0.448225
Q9UIA9	XPO7	-0.224539	-0.494512	0.0454326	-1.72269	0.0986694	0.327953	-0.223026	-0.462331	0.0162788	-1.93036	0.0662676	0.507339	-0.310786	-0.580758	-0.0408142	-2.38439	0.0259494	0.429673	-0.391512	-0.661484	-0.12154	-3.00372	0.00643571	0.0759773	-0.309963	-0.601566	-0.0183598	-2.20167	0.0382301	0.143262	0.370008
Q9UII4	HERC5	0.897032	0.113842	1.68022	2.37233	0.0266318	0.213054	0.667428	-0.0267956	1.36165	1.99131	0.0587298	0.497805	0.643686	-0.139504	1.42688	1.70232	0.10248	0.61312	0.684581	-0.0986086	1.46777	1.81047	0.0836046	0.328984	0.237858	-0.608084	1.0838	0.582385	0.566101	0.723633	0.175657
Q9UJU6	DBNL	-0.298926	-0.710787	0.112936	-1.5033	0.146675	0.394488	0.0328973	-0.332179	0.397974	0.186643	0.853614	0.963865	-0.206264	-0.618125	0.205598	-1.0373	0.310619	0.728938	-0.483414	-0.895275	-0.0715523	-2.43109	0.0234558	0.168692	-0.493261	-0.938122	-0.0483994	-2.2966	0.0313085	0.125234	0.286362
Q9UKV8;Q9UKV8-2	AGO2	-0.121583	-0.346537	0.103371	-1.11947	0.274752	0.560164	0.00129096	-0.19811	0.200691	0.0134098	0.989419	0.993462	-0.121651	-0.346605	0.103303	-1.1201	0.274491	0.709301	-0.090805	-0.315759	0.134149	-0.836083	0.411904	0.680297	-0.231428	-0.474406	0.0115507	-1.97279	0.0609353	0.196782	0.46028
Q9UL25	RAB21	-0.481639	-1.24745	0.284176	-1.30266	0.205872	0.479426	-0.168049	-0.846871	0.510774	-0.512758	0.61312	0.898234	-0.680852	-1.44667	0.0849631	-1.84146	0.0787825	0.599783	-0.135818	-0.901633	0.629997	-0.367339	0.7168	0.866488	-0.893446	-1.72062	-0.0662717	-2.2372	0.0354908	0.135505	0.919849
Q9UL46	PSME2	-0.0599819	-0.266733	0.146769	-0.600906	0.553911	0.760763	-0.0819915	-0.265257	0.101274	-0.926664	0.363939	0.781329	-0.083951	-0.290702	0.1228	-0.841031	0.409184	0.794107	-0.155821	-0.362572	0.0509298	-1.56104	0.132478	0.399679	-0.335896	-0.559213	-0.112579	-3.11543	0.00495251	0.0452075
Q9UNM6;Q9UNM6-2	PSMD13	-0.184443	-1.10353	0.734647	-0.415659	0.681598	0.835281	-0.473369	-1.28805	0.341317	-1.20349	0.241302	0.692769	-0.333505	-1.25259	0.585585	-0.751585	0.460094	0.820044	-0.251738	-1.17083	0.667351	-0.567316	0.576119	0.785817	-0.444284	-1.43701	0.548447	-0.926964	0.363787	0.547846
Q9UNS2	COPS3	-0.159899	-0.404728	0.0849293	-1.35275	0.189579	0.459104	-0.20326	-0.420277	0.0137579	-1.93995	0.0650278	0.503259	-0.104444	-0.349273	0.140384	-0.8836	0.38626	0.78209	-0.187559	-0.432388	0.0572692	-1.58676	0.126529	0.389994	-0.138237	-0.402682	0.126208	-1.08274	0.290398	0.471866
Q9UNZ2;Q9UNZ2-5	NSFL1C	-0.15915	-0.430885	0.112584	-1.2131	0.237679	0.525552	-0.0391378	-0.280005	0.201729	-0.336553	0.739574	0.951668	-0.0643909	-0.336125	0.207344	-0.49081	0.628316	0.904693	-0.0487132	-0.320448	0.223021	-0.371309	0.713882	0.865902	-0.182816	-0.476322	0.110691	-1.29012	0.210118	0.410387
Q9UPN7	PPP6R1	0.353867	-0.775655	1.48339	0.648902	0.522973	0.74653	-0.217822	-1.21904	0.783392	-0.450619	0.656579	0.913054	0.0710839	-1.05844	1.20061	0.13035	0.897449	0.974667	0.260041	-0.869481	1.38956	0.476848	0.638071	0.820784	-0.393251	-1.61327	0.826772	-0.667629	0.511164	0.684114
Q9UQ80	PA2G4	-0.11479	-0.341663	0.112083	-1.04798	0.305778	0.585206	-0.139672	-0.340774	0.0614296	-1.43856	0.164048	0.596951	-0.149914	-0.376787	0.0769593	-1.36865	0.184626	0.66648	-0.383029	-0.609902	-0.156156	-3.49689	0.00199054	0.0405636	-0.337505	-0.582556	-0.092454	-2.85271	0.00913029	0.0677163
Q9Y230	RUVBL2	-0.186009	-0.576221	0.204203	-0.987341	0.33398	0.602318	0.172701	-0.173185	0.518587	1.03418	0.312046	0.750596	-0.141057	-0.531269	0.249155	-0.748737	0.461775	0.820044	-0.364533	-0.754745	0.0256786	-1.93495	0.065671	0.29782	-0.548271	-0.969748	-0.126794	-2.69435	0.0130938	0.0818211
Q9Y285;Q9Y285-2	FARSA	0.395155	-1.20476	1.99507	0.511571	0.613938	0.797839	0.214702	-1.20347	1.63287	0.313575	0.756734	0.954502	0.597166	-1.00275	2.19708	0.773095	0.447516	0.819986	0.874424	-0.725488	2.47434	1.13203	0.269546	0.556366	0.0928443	-1.63526	1.82095	0.111281	0.912381	0.944208
Q9Y2V2	CARHSP1	-0.190272	-0.636107	0.255563	-0.883965	0.386067	0.651526	0.0439304	-0.35126	0.439121	0.230246	0.819982	0.954502	-0.263332	-0.709167	0.182502	-1.22339	0.233847	0.682215	-0.151576	-0.597411	0.294259	-0.70419	0.488543	0.717971	-0.313065	-0.794622	0.168491	-1.34655	0.191541	0.385247
Q9Y2Z0;Q9Y2Z0-2	SUGT1	-0.326403	-0.765707	0.1129	-1.53895	0.137769	0.38168	-0.00245673	-0.391858	0.386944	-0.0130676	0.989689	0.993462	-0.15429	-0.593593	0.285014	-0.727456	0.474452	0.820044	-0.37301	-0.812313	0.0662936	-1.75869	0.0922315	0.337074	-0.298498	-0.773	0.176003	-1.30298	0.205765	0.404709
Q9Y315	DERA	0.2196	-0.230296	0.669496	1.01101	0.322767	0.590771	0.127144	-0.271646	0.525934	0.660368	0.515725	0.838434	0.043575	-0.406321	0.493471	0.200613	0.842804	0.967635	0.179025	-0.270871	0.628921	0.824204	0.418479	0.682441	-0.0575622	-0.543505	0.428381	-0.24535	0.808411	0.887881
Q9Y3I1;Q9Y3I1-2;Q9Y3I1-3	FBXO7	0.0627568	-0.197002	0.322515	0.500408	0.621649	0.799606	0.0404858	-0.189766	0.270737	0.364195	0.719114	0.948165	-0.0674549	-0.327213	0.192304	-0.53787	0.59595	0.876687	-0.09738	-0.357139	0.162378	-0.776486	0.445552	0.694371	-0.141279	-0.42185	0.139293	-1.04296	0.30805	0.489859
Q9Y490	TLN1	-0.477806	-0.897202	-0.0584094	-2.35972	0.0273629	0.216471	-0.326887	-0.698642	0.044868	-1.82127	0.081896	0.534953	-0.0903735	-0.50977	0.329023	-0.446324	0.659631	0.913283	-0.326936	-0.746333	0.0924599	-1.61463	0.120335	0.384209	-0.44255	-0.895549	0.0104501	-2.02347	0.0550666	0.183653
Q9Y4E8	USP15	-0.122822	-0.409998	0.164353	-0.885855	0.38507	0.651526	0.0489049	-0.205649	0.303459	0.39793	0.694434	0.936434	-0.0767417	-0.363917	0.210434	-0.5535	0.585382	0.874596	-0.0615764	-0.348752	0.225599	-0.44412	0.6612	0.834706	-0.145891	-0.456076	0.164294	-0.974183	0.340328	0.521898
Q9Y5Z4	HEBP2	0.0412057	-0.350674	0.433086	0.21779	0.829557	0.91715	0.0406928	-0.306672	0.388057	0.242642	0.810482	0.954502	-0.140971	-0.532851	0.250909	-0.745094	0.463931	0.820044	-0.223543	-0.615423	0.168336	-1.18152	0.249738	0.535583	-0.207956	-0.631234	0.215323	-1.0176	0.31969	0.499969
